# Supplementary material for: Comparative genomic analysis of a new tellurite-resistant Psychrobacter strain isolated from the Antarctic Peninsula
Source: PeerJ journal article supplement (doi:10.7717/peerj.4402), 2018-02-19
Supplement: Figure_S1.pdf [file Figure_S1.pdf]

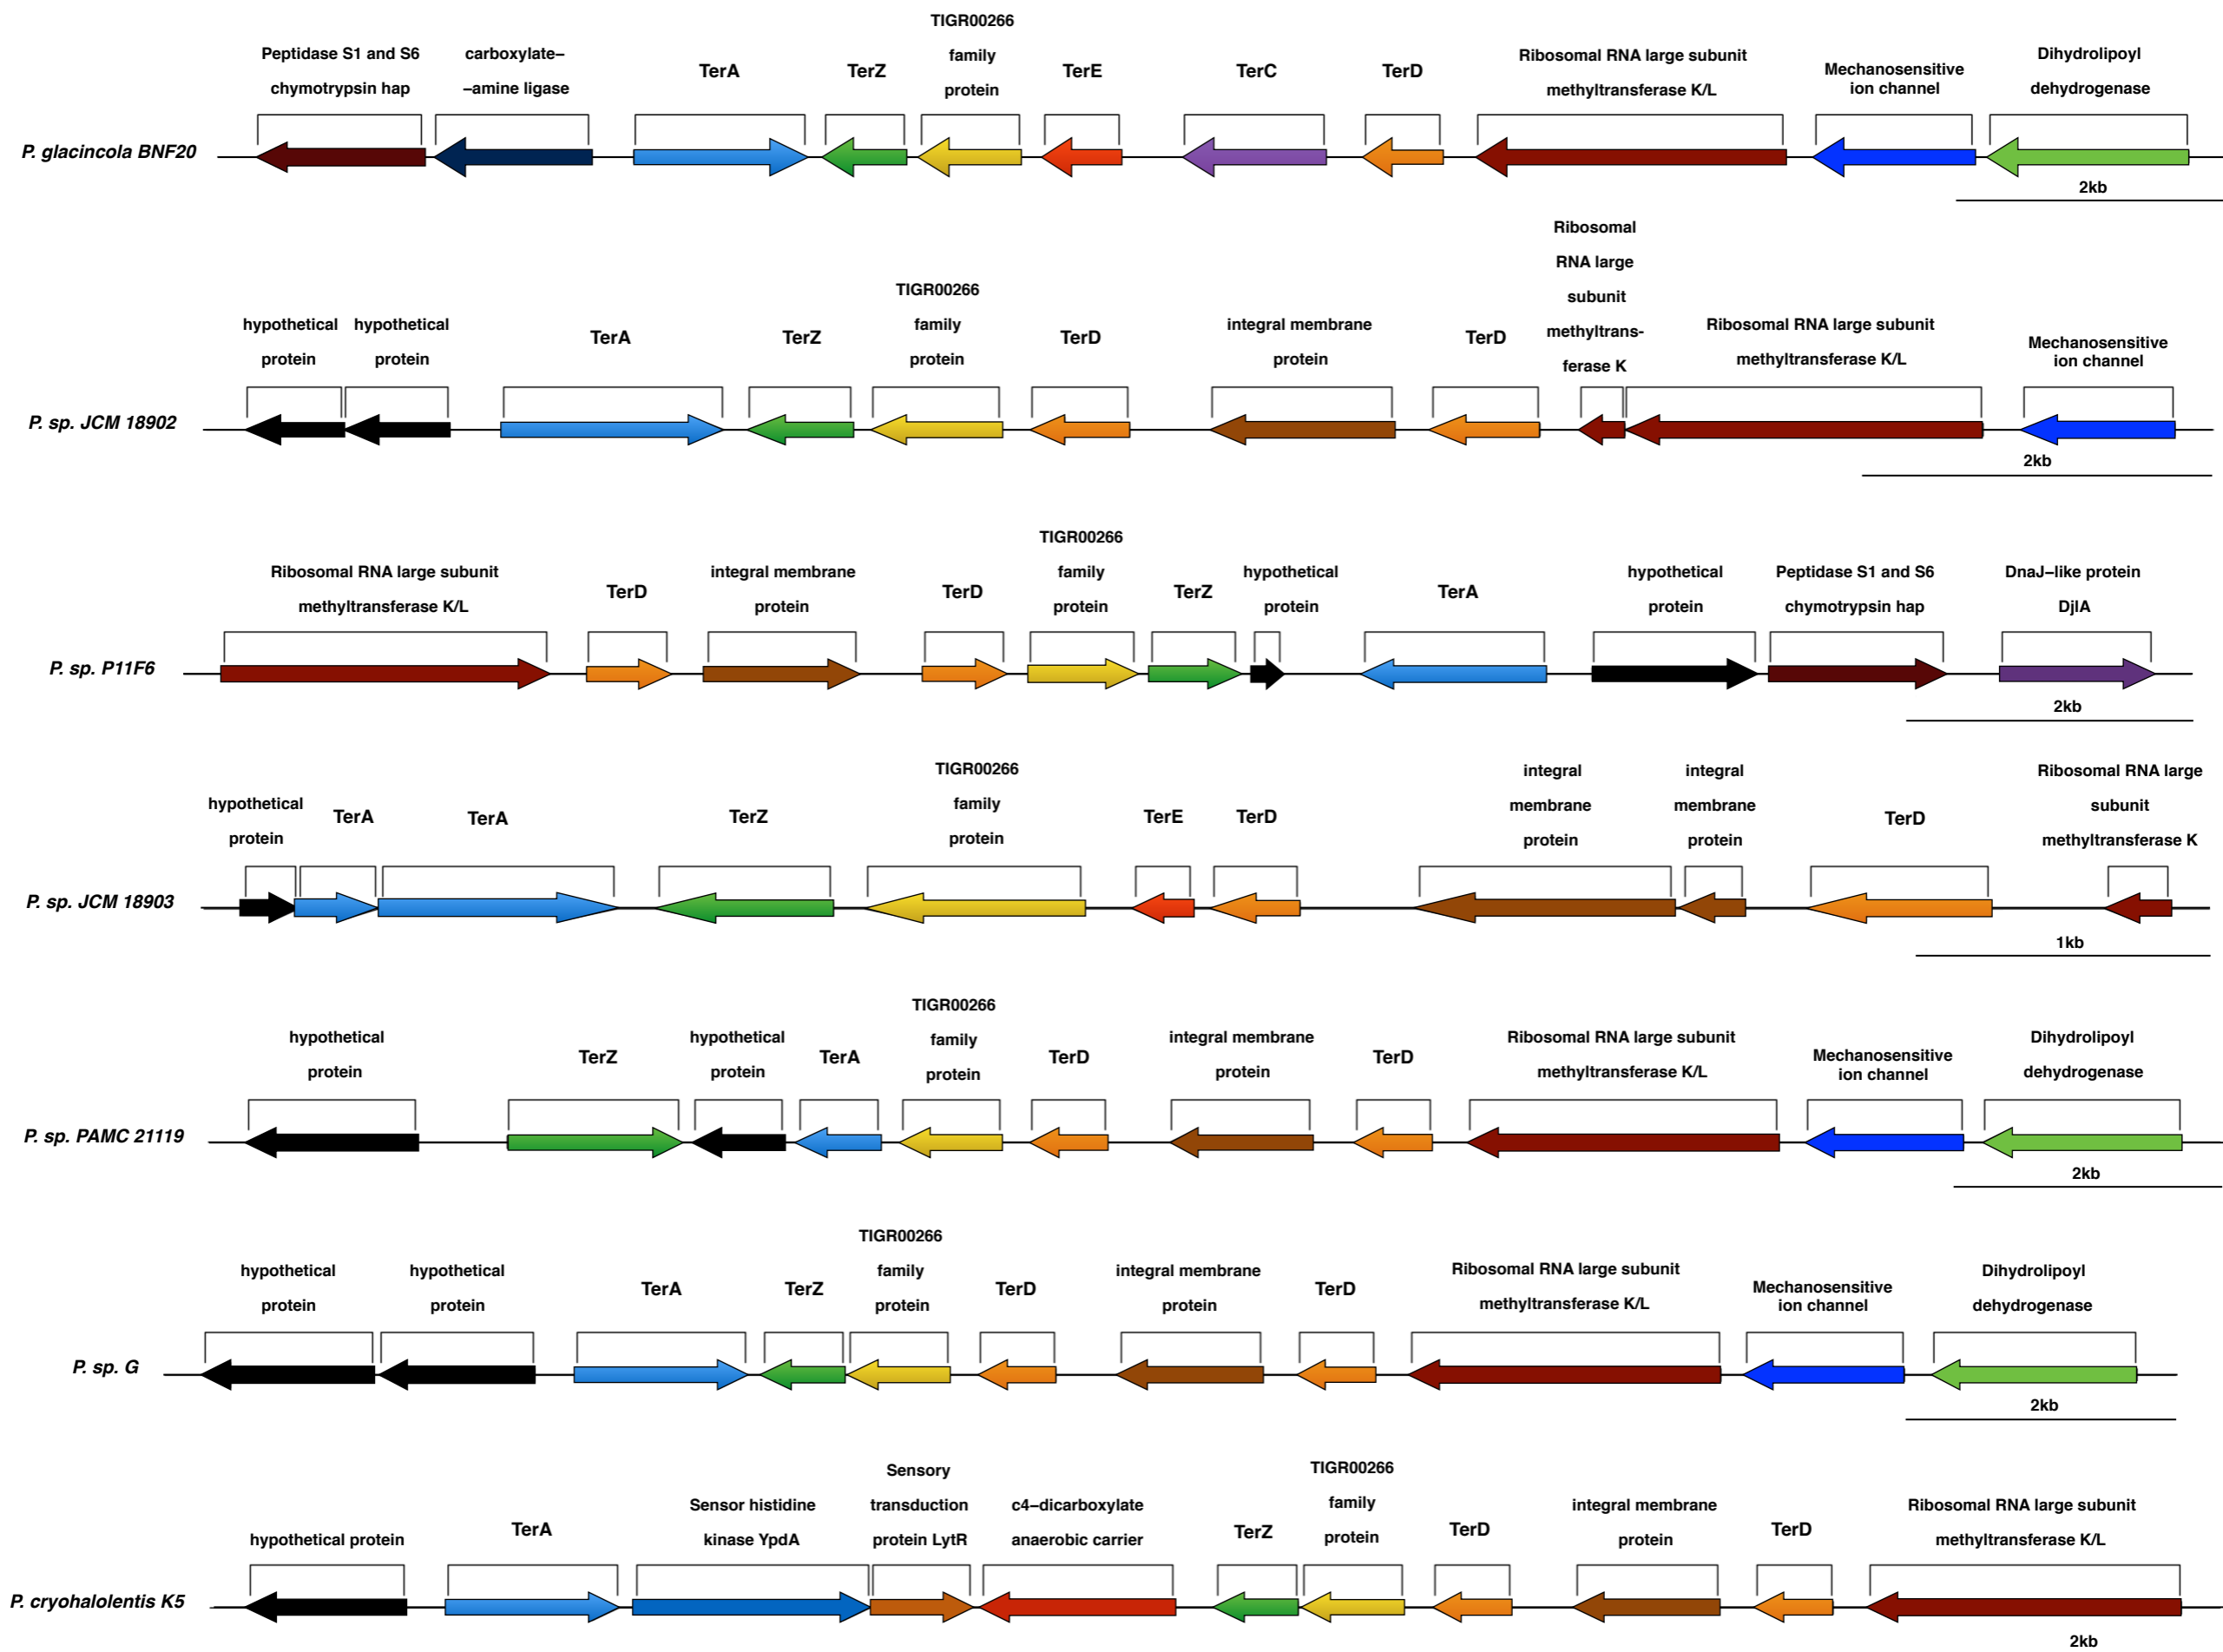

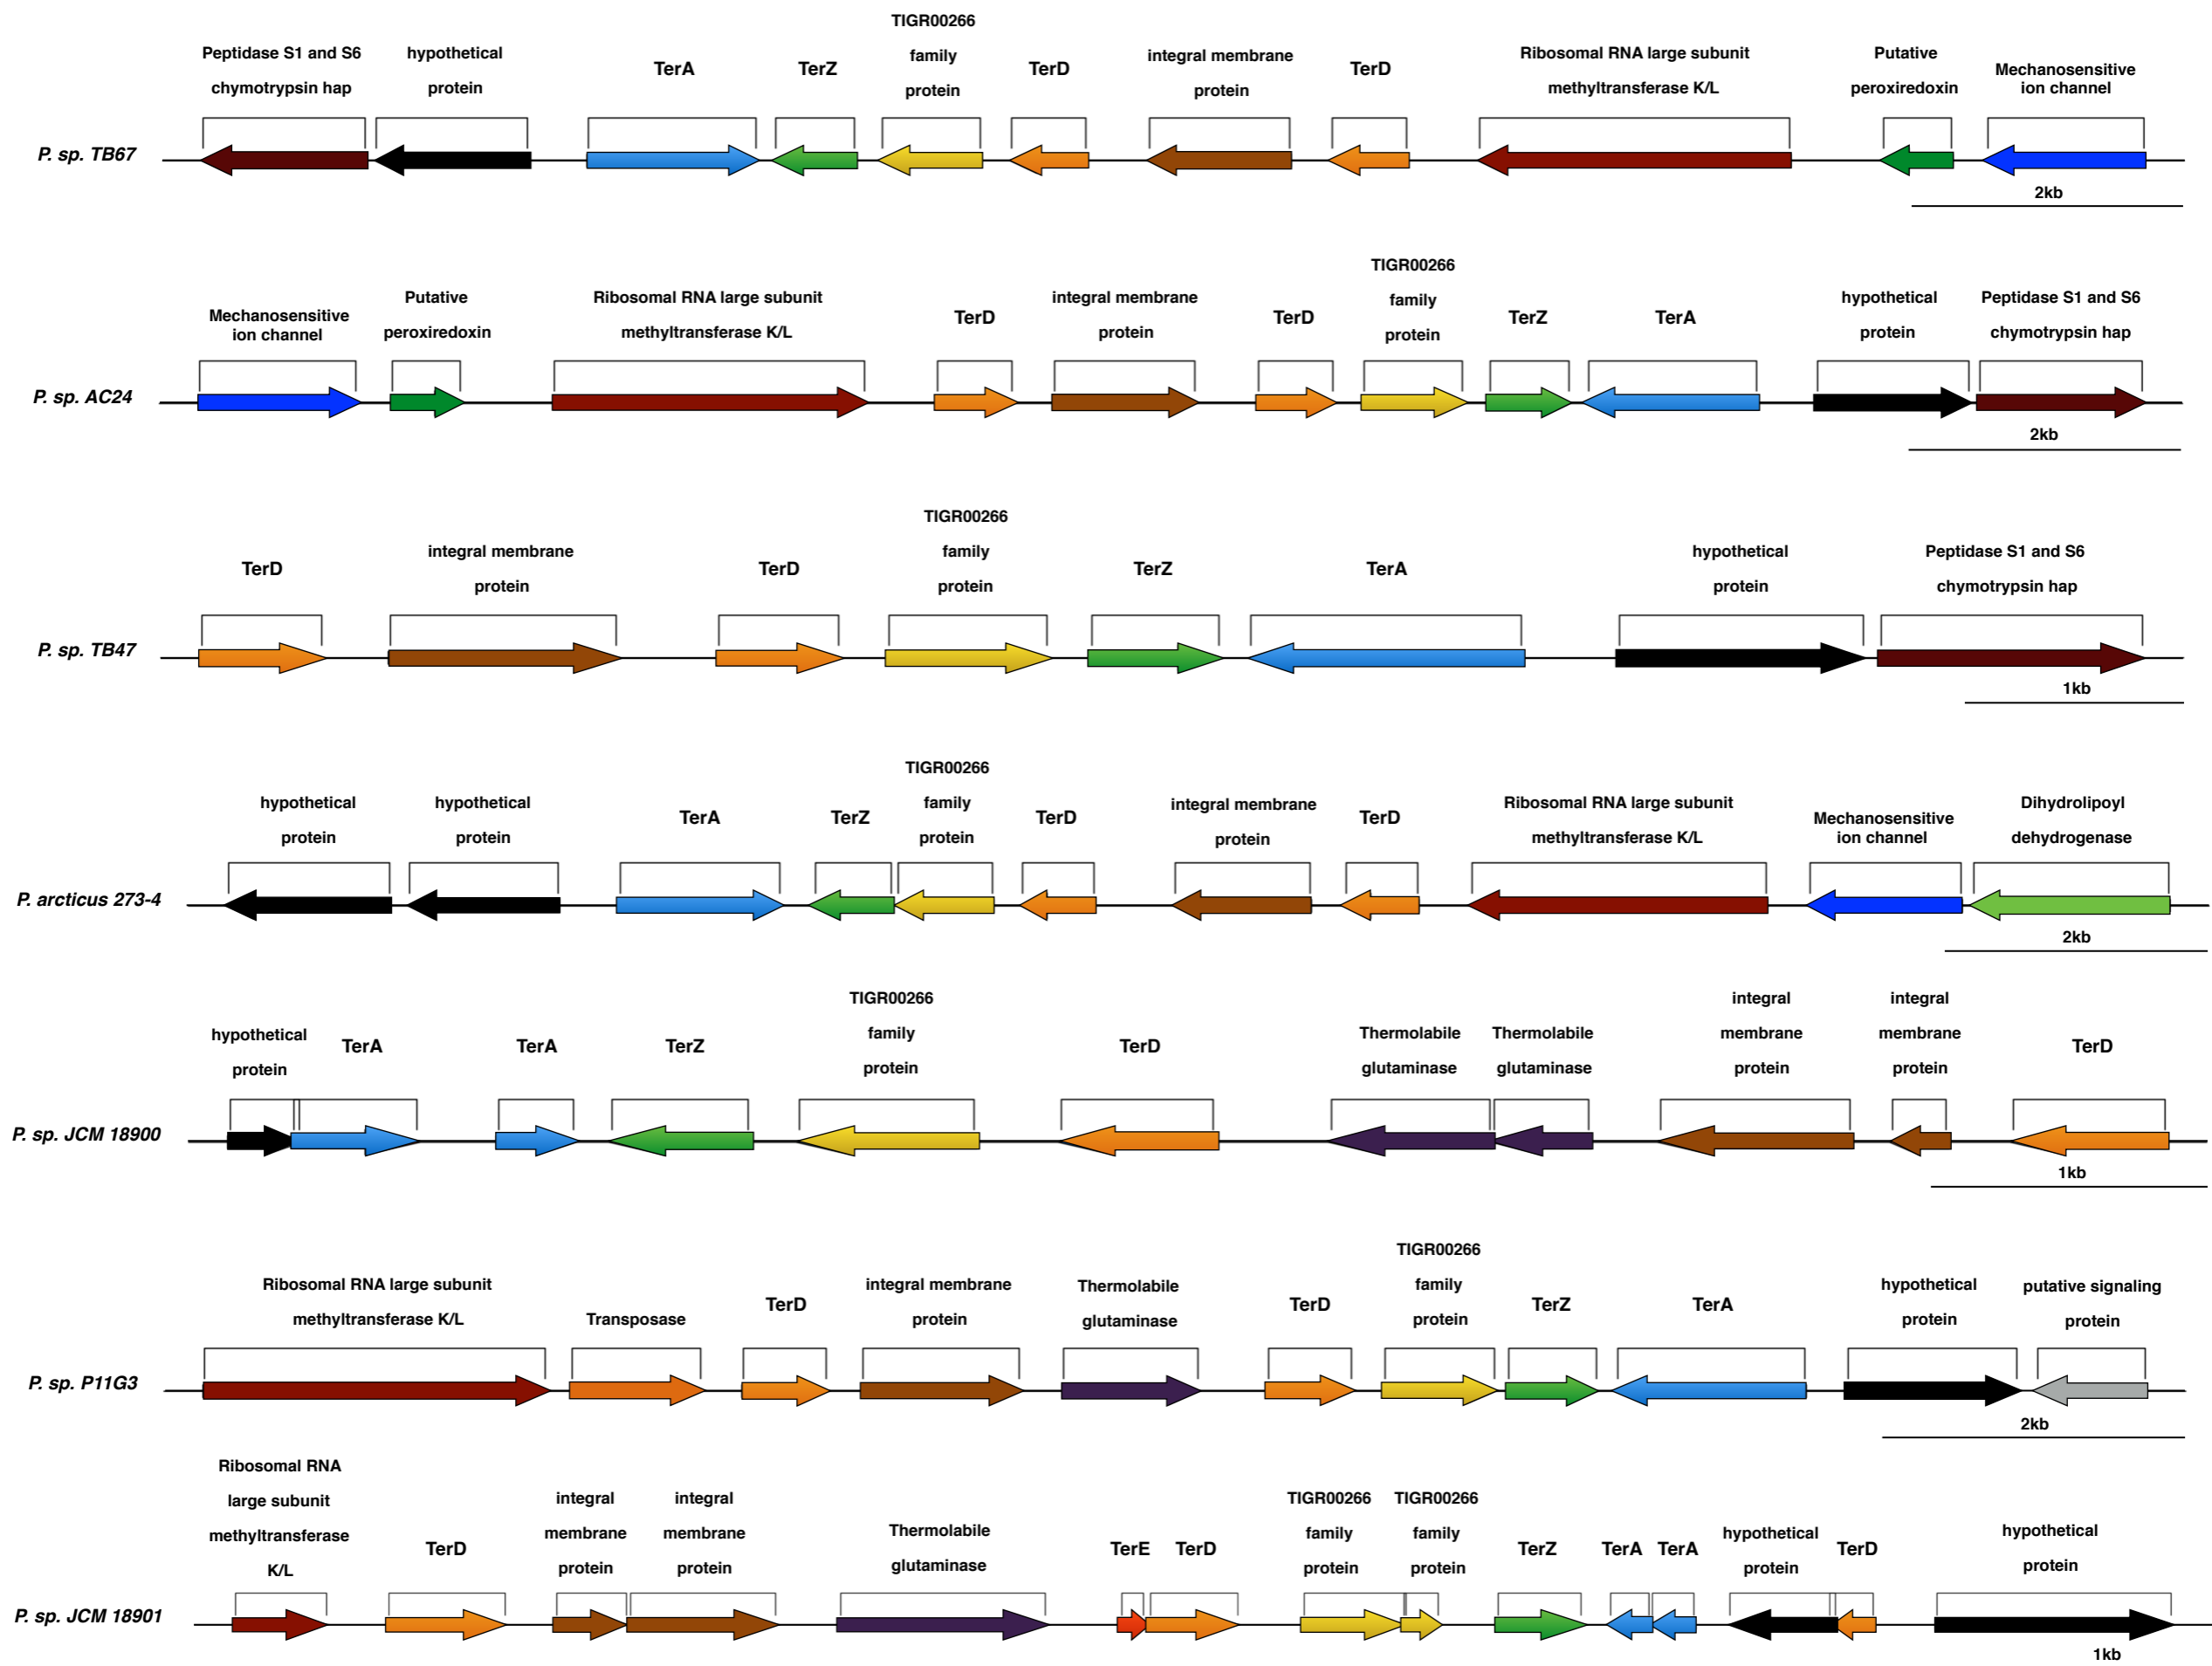

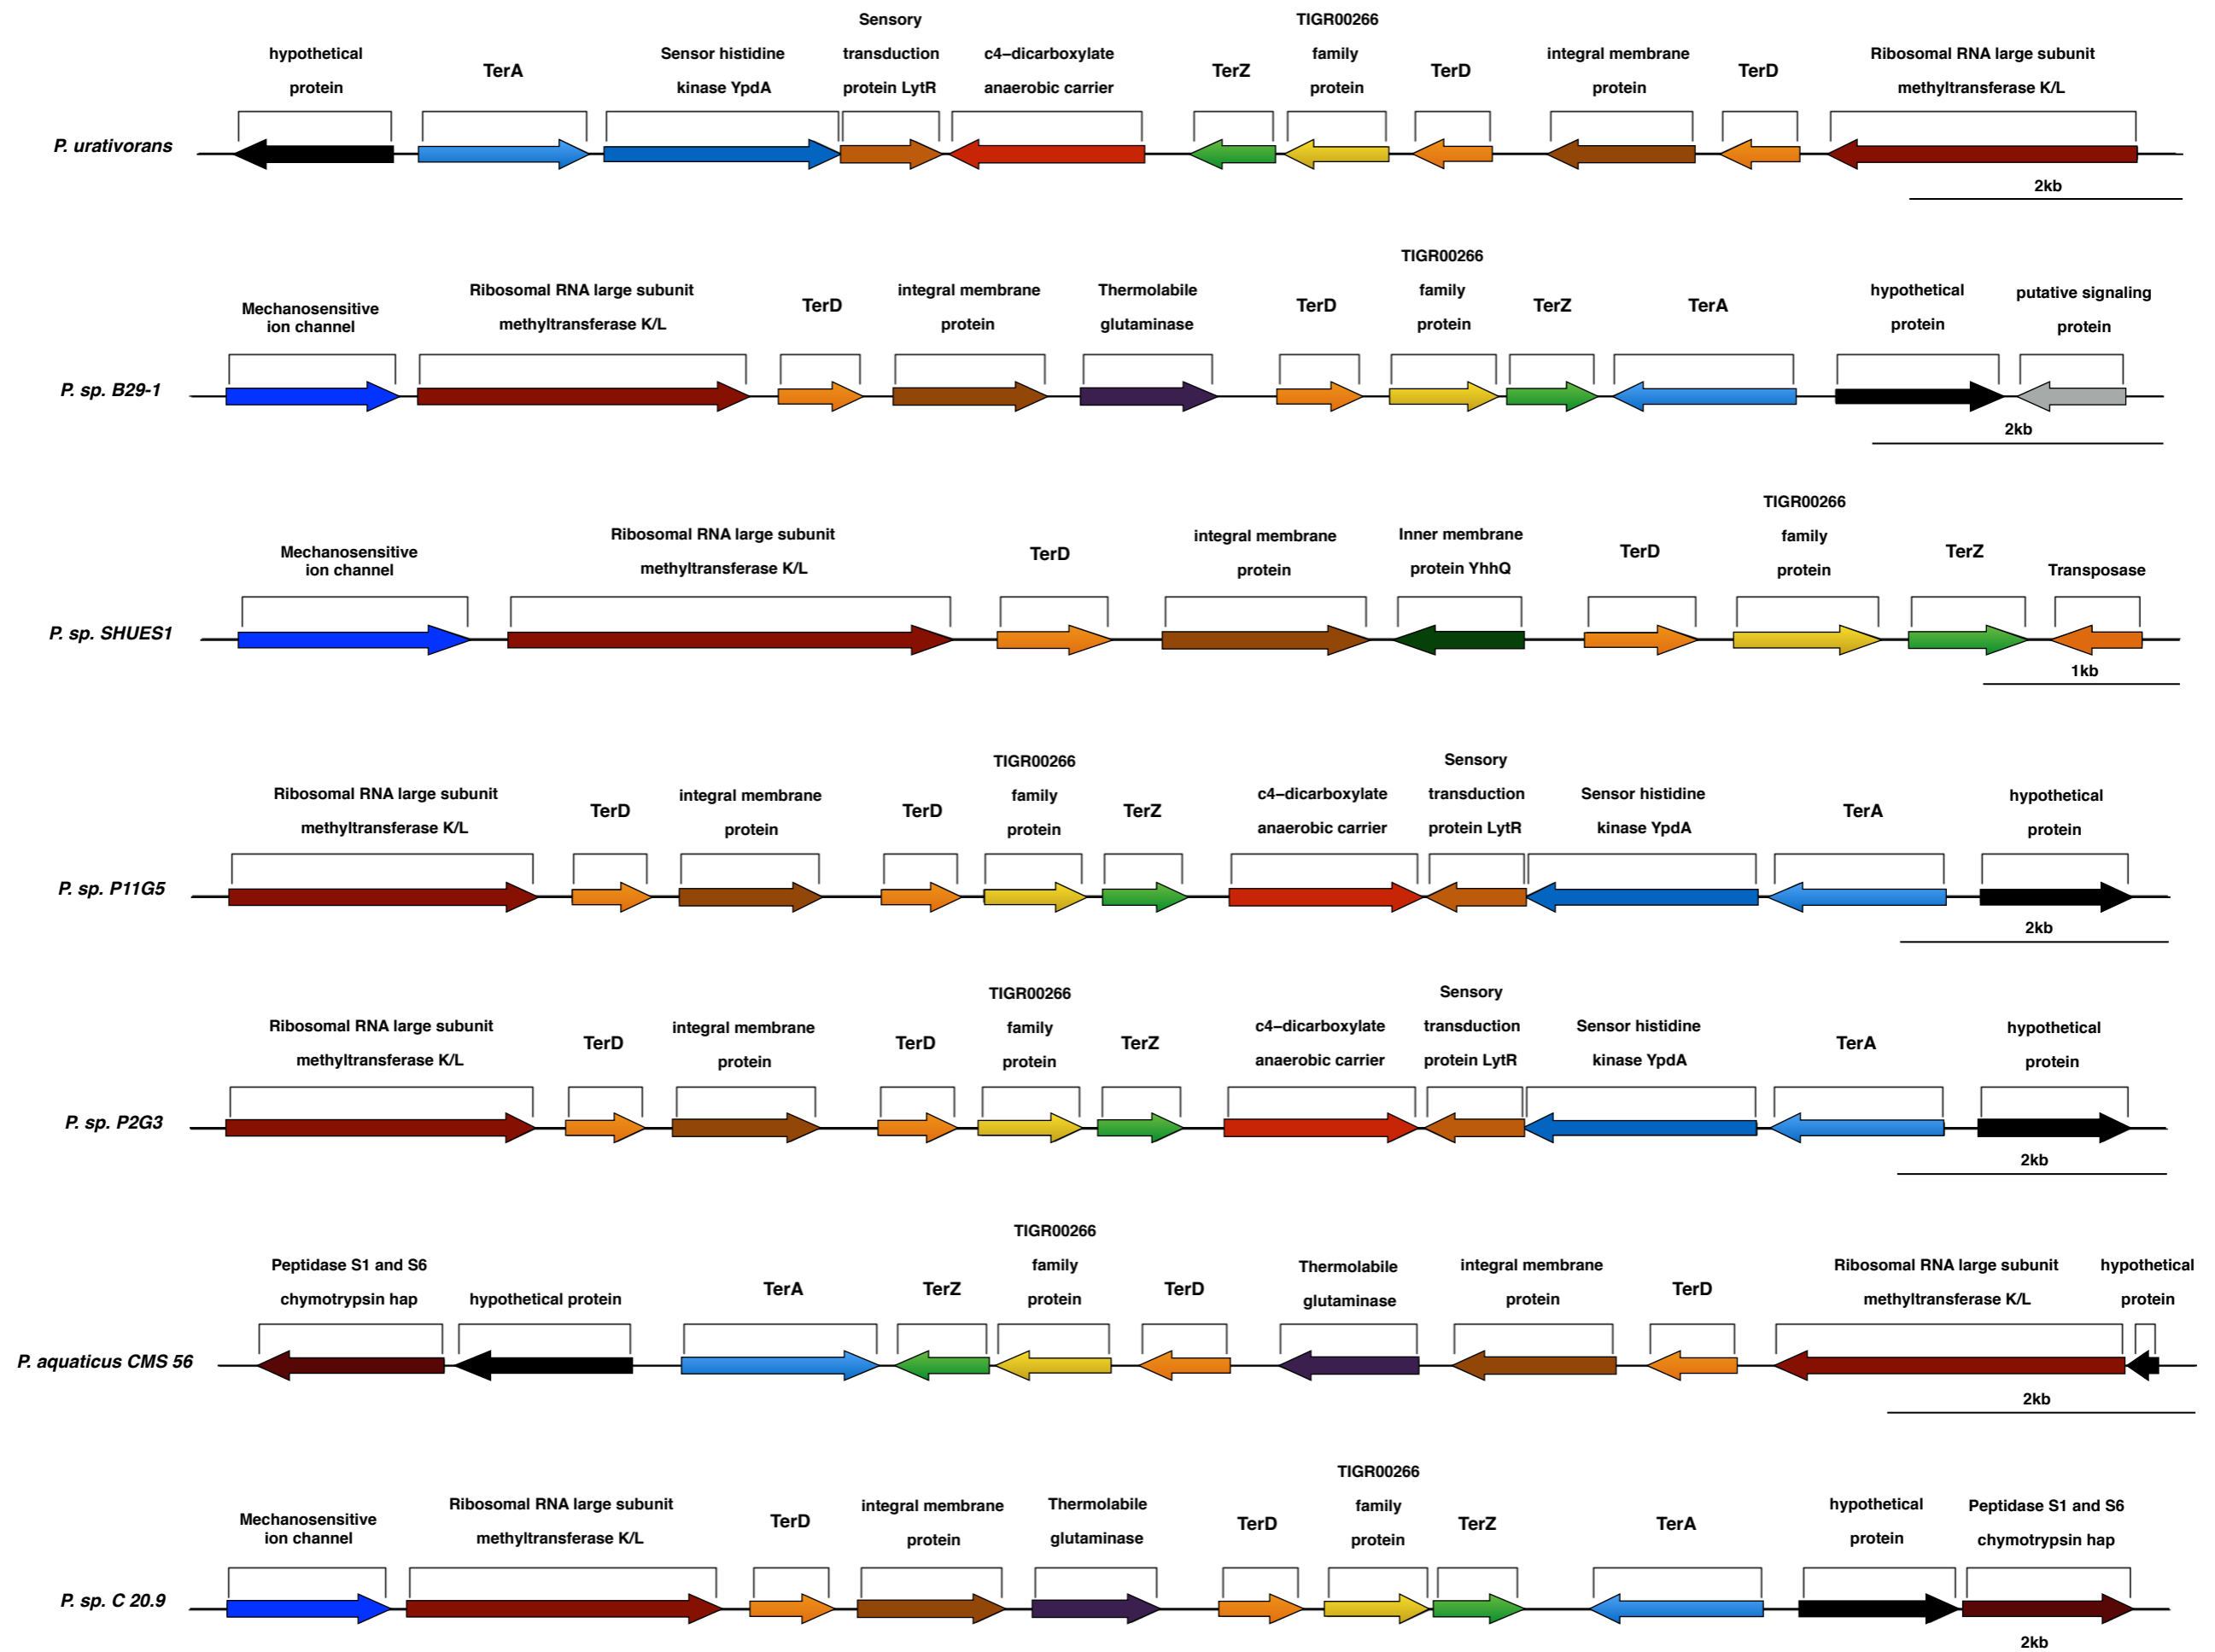

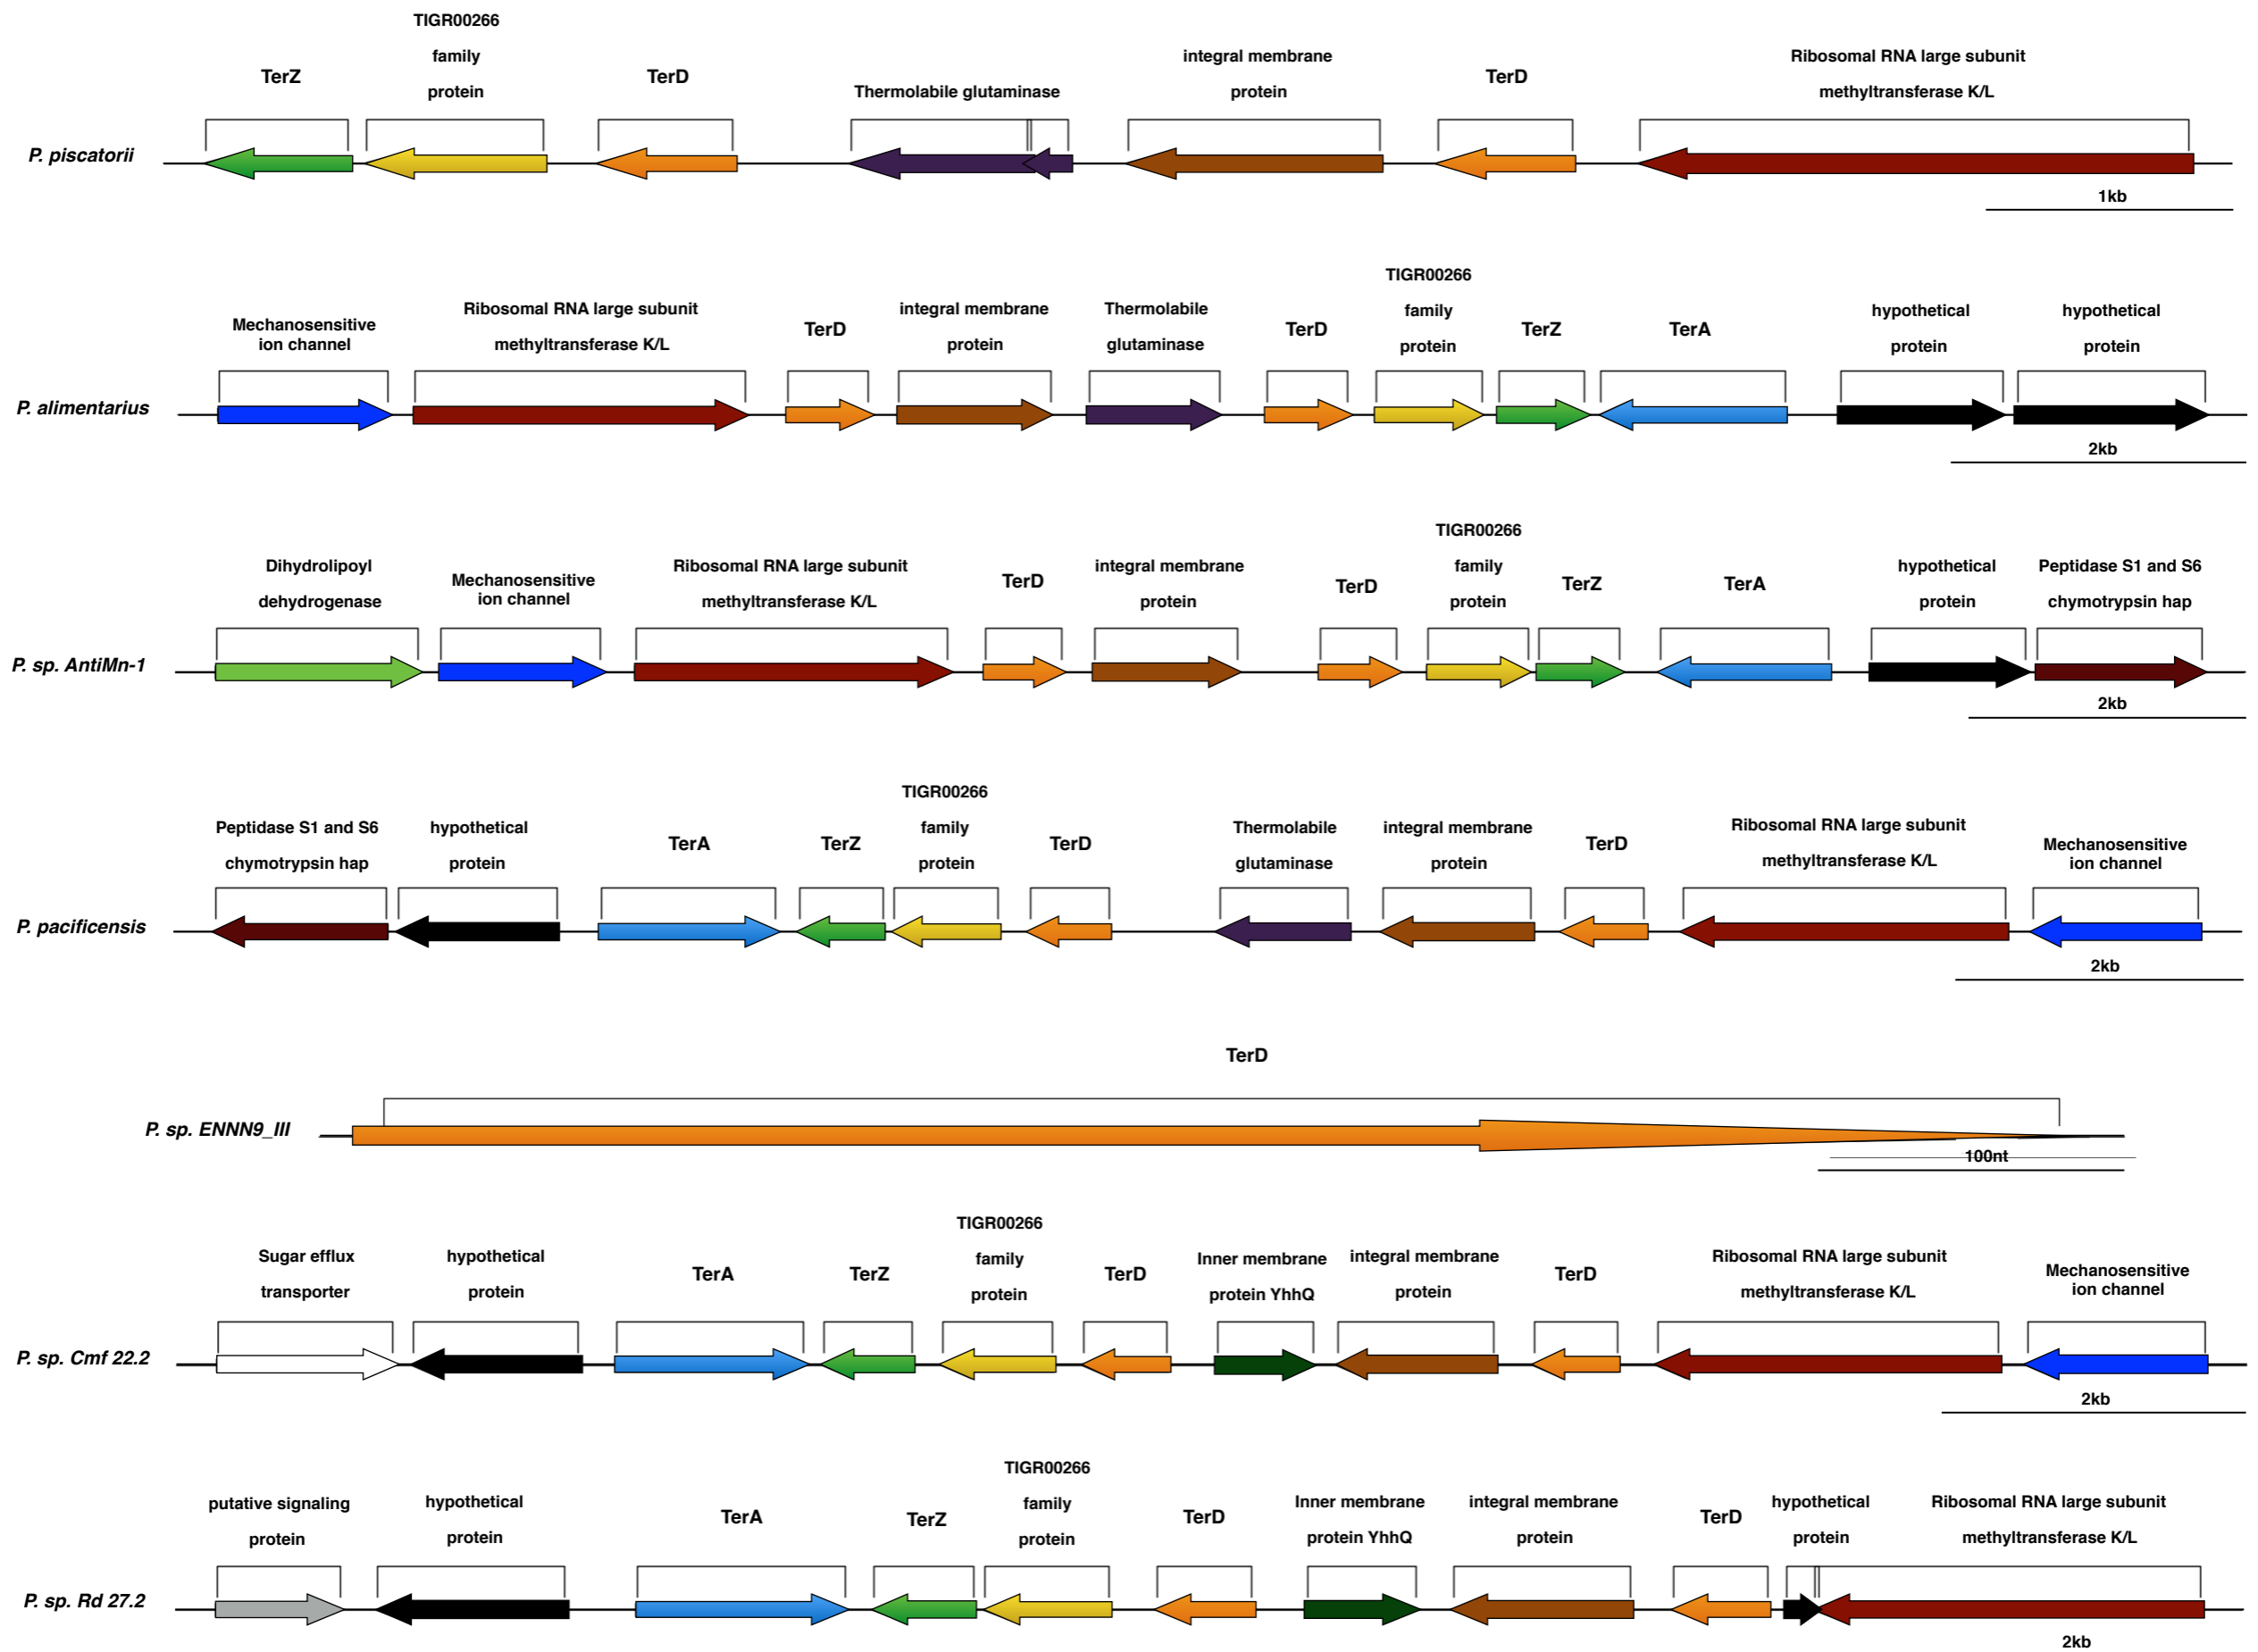

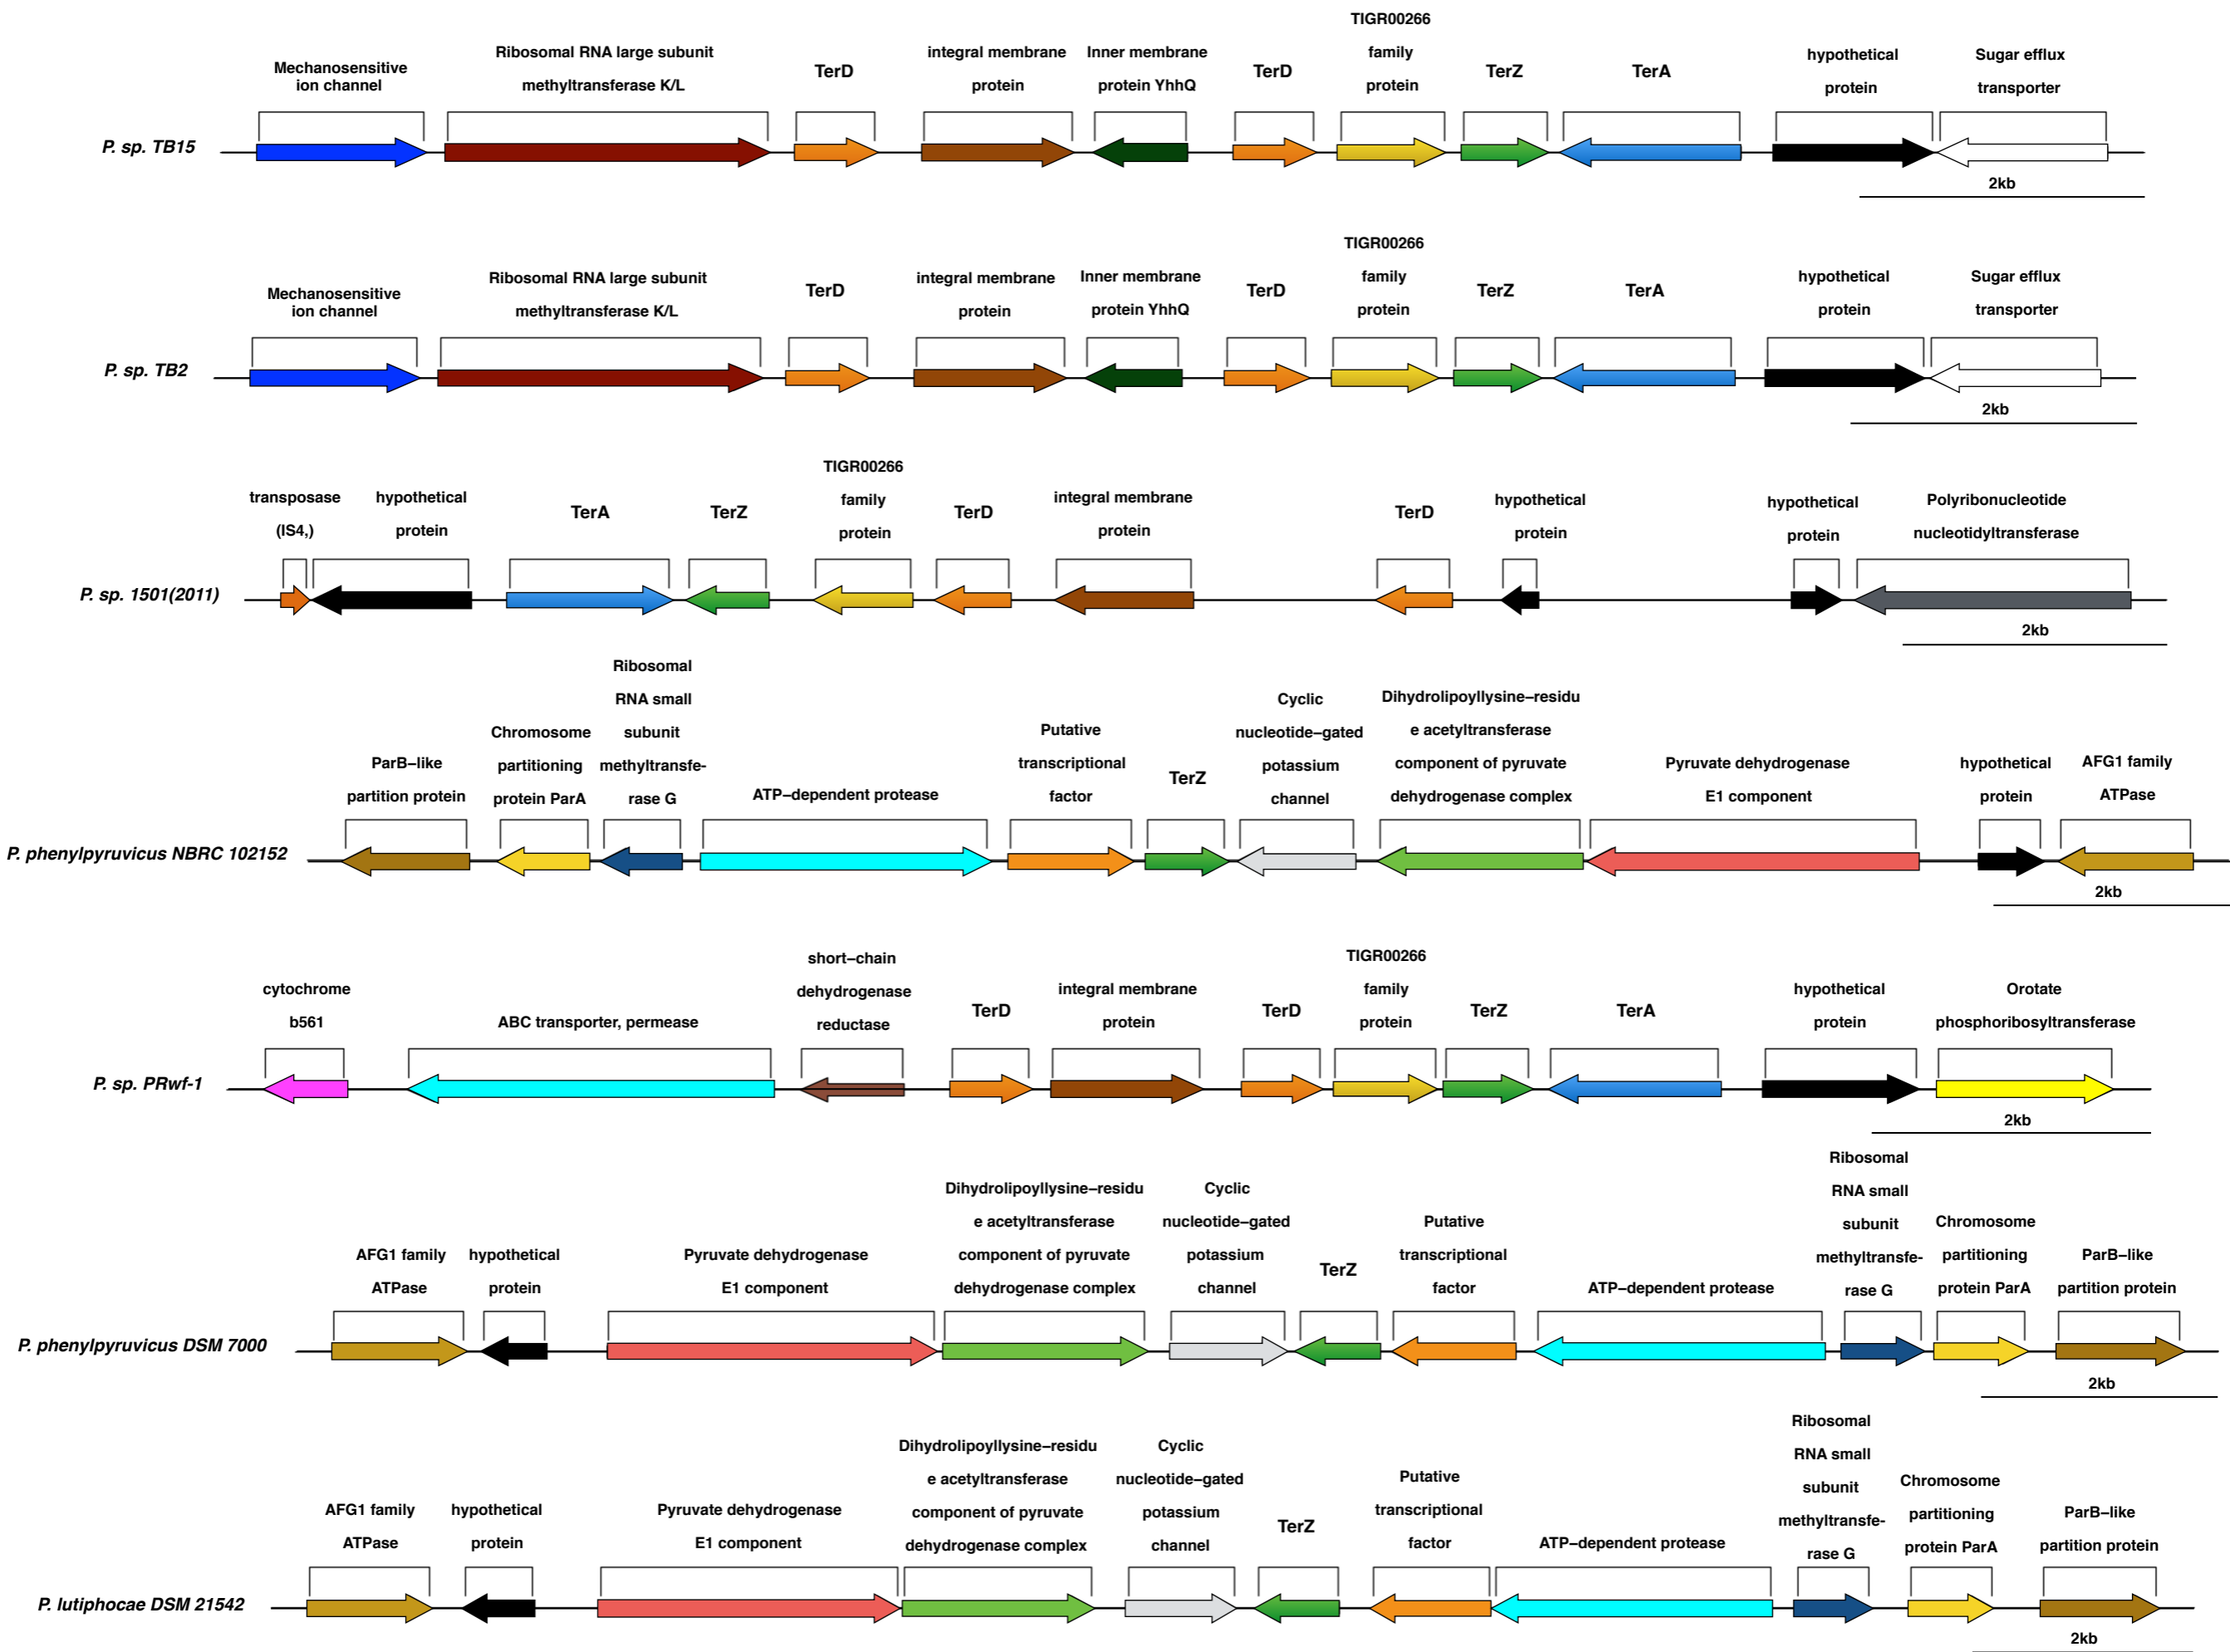

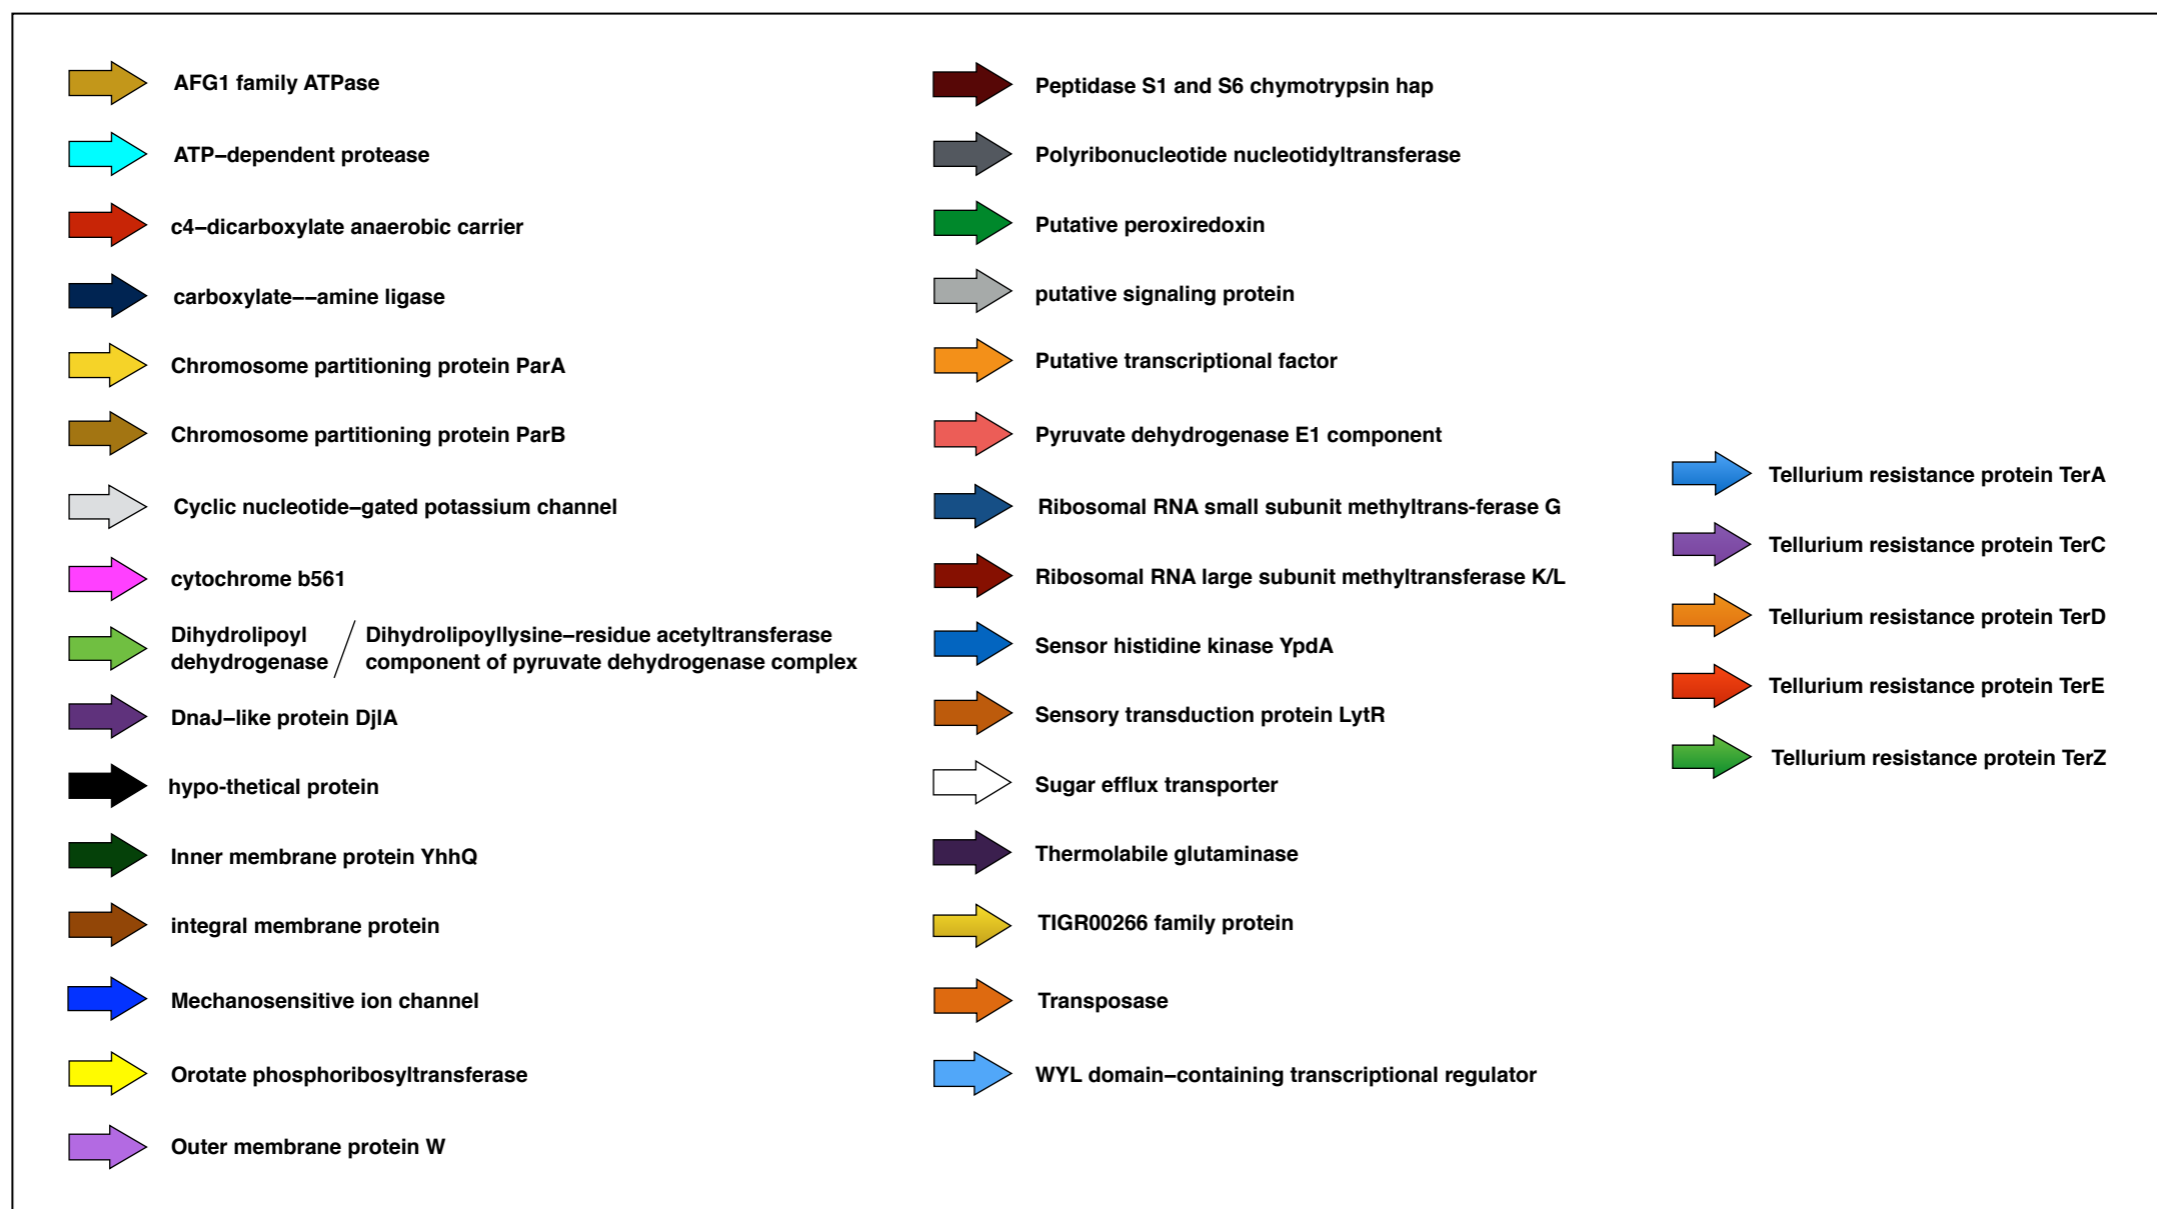

**Figure S1.** Genetic context of *ter* genes in the indicated *Psychrobacter* species.
