# Supplementary material for: Comparative genomic analysis of a new tellurite-resistant Psychrobacter strain isolated from the Antarctic Peninsula
Source: PeerJ. 2018 Feb 19;6:e4402. doi: 10.7717/peerj.4402 (PMC5822837; doi:10.7717/peerj.4402)
Supplement: Table S2 [file peerj-06-4402-s002.xlsx]

## Sheet: values
	Table S2. Average nucleotide identity (ANI) and per cent of alignment fraction among the indicated Psychrobacter species.
	Psychrobacter genome	Identity percentage against P. glacincola BNF20 genome	Alignment fraction against P. glacincola BNF20 genome
	Psychrobacter glacincola BNF20	1	1
	Psychrobacter sp. JCM 18902	0.960626	0.835732
	Psychrobacter sp. P11F6	0.96022	0.853656
	Psychrobacter sp. JCM 18903	0.95929	0.843948
	Psychrobacter sp. PAMC 21119	0.863241	0.384152
	Psychrobacter sp. G	0.861676	0.310465
	Psychrobacter cryohalolentis K5	0.860558	0.297922
	Psychrobacter sp. TB67	0.859271	0.358714
	Psychrobacter sp. AC24	0.859184	0.357924
	Psychrobacter sp. TB47	0.859176	0.354193
	Psychrobacter arcticus 273-4	0.855843	0.245111
	Psychrobacter sp. JCM 18900	0.853794	0.257918
	Psychrobacter sp. P11G3	0.853788	0.272003
	Psychrobacter sp. JCM 18901	0.85358	0.262292
	Psychrobacter urativorans	0.853425	0.1209
	Psychrobacter sp. B29-1	0.852903	0.265172
	Psychrobacter sp. SHUES1	0.852736	0.282354
	Psychrobacter sp. P11G5	0.852559	0.218602
	Psychrobacter sp. P2G3	0.852473	0.217661
	Psychrobacter aquaticus CMS56	0.851667	0.314694
	Psychrobacter sp. C 20-9	0.850647	0.233695
	Psychrobacter piscatorii	0.849675	0.237755
	Psychrobacter alimentarius	0.849137	0.246025
	Psychrobacter sp. AntiMn-1	0.848162	0.229912
	Psychrobacter pacificensis	0.847085	0.230277
	Psychrobacter sp. ENNN9 III	0.844684	0.163892
	Psychrobacter sp. Cmf 22-2	0.844063	0.174113
	Psychrobacter sp. Rd 27-2	0.843638	0.210824
	Psychrobacter sp. TB15	0.840496	0.0717047
	Psychrobacter sp. TB2	0.840305	0.072125
	Psychrobacter sp. 1501 2011	0.839771	0.018929
	Psychrobacter phenylpyruvicus NBRC 102152	0.835978	0.0176198
	Psychrobacter sp. PRwf-1	0.832746	0.0247045
	Psychrobacter phenylpyruvicus DSM 7000	0.830607	0.0172353
	Psychrobacter lutiphocae DSM 21542	0.829121	0.018668
	* The first four highlight rows indicate those Psychrobacter genomes who had an alignment fraction over 80% with P. glacincola BNF20 genome.

## Sheet: ANI_%Identity
	Psychrobacter_sp_PRwf-1	Psychrobacter_sp_AntiMn-1	Psychrobacter_sp_B29-1	Psychrobacter_sp_C_20-9	Psychrobacter_alimentarius	Psychrobacter_sp_P2G3	Psychrobacter_sp_JCM_18900	Psychrobacter_sp_Rd_27-2	Psychrobacter_sp_P11G5	Psychrobacter_cryohalolentis_K5	Psychrobacter_pacificensis	Psychrobacter_sp_JCM_18901	Psychrobacter_sp_PAMC_21119	Psychrobacter_phenylpyruvicus_NBRC_102152	Psychrobacter_sp_TB67	Psychrobacter_sp_1501_2011	Psychrobacter_urativorans	Psychrobacter_piscatorii	Psychrobacter_sp_JCM_18903	Psychrobacter_sp_TB2	Psychrobacter_aquaticus_CMS56	Psychrobacter_sp_TB47	Psychrobacter_glacincola_BNF20	Psychrobacter_sp_G	Psychrobacter_sp_Cmf_22-2	Psychrobacter_sp_JCM_18902	Psychrobacter_lutiphocae_DSM_21542	Psychrobacter_sp_P11F6	Psychrobacter_arcticus_273-4	Psychrobacter_sp_AC24	Psychrobacter_sp_ENNN9_III	Psychrobacter_phenylpyruvicus_DSM_7000	Psychrobacter_sp_TB15	Psychrobacter_sp_P11G3	Psychrobacter_sp_SHUES1
Psychrobacter_sp_PRwf-1	1	0.853592	0.851845	0.84471	0.869094	0.850122	0.841506	0.841546	0.889725	0.846904	0.845605	0.854124	0.85719	0.855344	0.841011	0.863548	0.830417	0.871447	0.836441	0.867892	0.837226	0.84408	0.832746	0.860435	0.840586	0.856136	0.846785	0.85453	0.847233	0.839583	0.837281	0.854817	0.867822	0.844615	0.848333
Psychrobacter_sp_AntiMn-1	0.853592	1	0.86816	0.955497	0.853364	0.85126	0.860673	0.857284	0.855096	0.847331	0.977158	0.864291	0.854332	0.845624	0.854879	0.876737	0.843312	0.957205	0.849371	0.89544	0.851614	0.86515	0.848162	0.8475	0.847912	0.849322	0.833293	0.850438	0.847622	0.868895	0.849922	0.839026	0.888143	0.864236	0.858316
Psychrobacter_sp_B29-1	0.851845	0.86816	1	0.870732	0.854768	0.850911	0.937516	0.847742	0.858415	0.851808	0.868814	0.941385	0.861291	0.838258	0.860556	0.841385	0.84613	0.871966	0.854494	0.865387	0.853633	0.863147	0.852903	0.852644	0.846828	0.85321	0.831543	0.85413	0.85148	0.86437	0.845927	0.834471	0.865396	0.938877	0.848686
Psychrobacter_sp_C_20-9	0.84471	0.955497	0.870732	1	0.855559	0.852628	0.864446	0.85159	0.857044	0.851164	0.95566	0.867728	0.853664	0.839902	0.860212	0.867958	0.84264	0.96103	0.853982	0.874301	0.85216	0.862731	0.850647	0.849655	0.856211	0.851627	0.834002	0.851987	0.848889	0.864387	0.852562	0.843599	0.881959	0.867434	0.864459
Psychrobacter_alimentarius	0.869094	0.853364	0.854768	0.855559	1	0.852826	0.854872	0.844456	0.85834	0.850115	0.853308	0.854083	0.85142	0.842205	0.850992	0.856094	0.84386	0.858888	0.851169	0.843684	0.852555	0.851505	0.849137	0.851656	0.851673	0.851148	0.833163	0.853747	0.847957	0.850439	0.852429	0.836617	0.849693	0.857435	0.855127
Psychrobacter_sp_P2G3	0.850122	0.85126	0.850911	0.852628	0.852826	1	0.852121	0.845074	0.973302	0.858615	0.849278	0.850109	0.856797	0.838358	0.863592	0.845731	0.84515	0.851915	0.856105	0.850329	0.851463	0.866435	0.852473	0.859817	0.862444	0.853535	0.834507	0.855636	0.851616	0.867606	0.863261	0.834418	0.84913	0.854742	0.855505
Psychrobacter_sp_JCM_18900	0.841506	0.860673	0.937516	0.864446	0.854872	0.852121	1	0.847827	0.852995	0.853902	0.862004	0.938453	0.863718	0.840028	0.855936	0.85504	0.846109	0.865341	0.856801	0.847964	0.852114	0.858625	0.853794	0.853732	0.851264	0.857546	0.834702	0.857463	0.850451	0.859622	0.851334	0.835167	0.851032	0.94179	0.852004
Psychrobacter_sp_Rd_27-2	0.841546	0.857284	0.847742	0.85159	0.844456	0.845074	0.847827	1	0.846978	0.84205	0.856835	0.846682	0.846804	0.839836	0.85175	0.855598	0.840809	0.853389	0.843791	0.867919	0.843341	0.850087	0.843638	0.842166	0.866533	0.842887	0.83168	0.844088	0.843793	0.851636	0.865093	0.834848	0.868479	0.849646	0.850882
Psychrobacter_sp_P11G5	0.889725	0.855096	0.858415	0.857044	0.85834	0.973302	0.852995	0.846978	1	0.858822	0.858759	0.851091	0.856697	0.841837	0.867429	0.856856	0.845227	0.862638	0.856084	0.864021	0.85081	0.867849	0.852559	0.861741	0.863178	0.856342	0.837582	0.857053	0.85422	0.871356	0.863726	0.8381	0.866345	0.86043	0.863249
Psychrobacter_cryohalolentis_K5	0.846904	0.847331	0.851808	0.851164	0.850115	0.858615	0.853902	0.84205	0.858822	1	0.850214	0.850489	0.86067	0.839022	0.855943	0.851371	0.85372	0.852109	0.862238	0.851009	0.850248	0.856556	0.860558	0.96888	0.847218	0.860758	0.833249	0.860908	0.893144	0.859557	0.848156	0.835348	0.84896	0.854903	0.855582
Psychrobacter_pacificensis	0.845605	0.977158	0.868814	0.95566	0.853308	0.849278	0.862004	0.856835	0.858759	0.850214	1	0.86319	0.848671	0.838399	0.865404	0.864842	0.84395	0.956684	0.852441	0.879688	0.84983	0.865377	0.847085	0.847581	0.854845	0.850457	0.828246	0.851388	0.846915	0.865468	0.854377	0.845659	0.884274	0.864912	0.863343
Psychrobacter_sp_JCM_18901	0.854124	0.864291	0.941385	0.867728	0.854083	0.850109	0.938453	0.846682	0.851091	0.850489	0.86319	1	0.861042	0.838917	0.858917	0.837689	0.845058	0.867217	0.85635	0.846788	0.852908	0.858689	0.85358	0.851555	0.846876	0.854628	0.831249	0.854864	0.851315	0.858466	0.846054	0.835859	0.848029	0.938356	0.848715
Psychrobacter_sp_PAMC_21119	0.85719	0.854332	0.861291	0.853664	0.85142	0.856797	0.863718	0.846804	0.856697	0.86067	0.848671	0.861042	1	0.851235	0.879022	0.846775	0.849392	0.853206	0.863909	0.846424	0.853308	0.878516	0.863241	0.861507	0.84632	0.862897	0.840788	0.864678	0.855213	0.878422	0.847685	0.836702	0.845703	0.861188	0.850742
Psychrobacter_phenylpyruvicus_NBRC_102152	0.855344	0.845624	0.838258	0.839902	0.842205	0.838358	0.840028	0.839836	0.841837	0.839022	0.838399	0.838917	0.851235	1	0.832272	0.861882	0.830062	0.843441	0.834719	0.836307	0.846788	0.834972	0.835978	0.840596	0.844226	0.835445	0.852428	0.839595	0.841688	0.858043	0.849134	0.999437	0.833741	0.836482	0.845951
Psychrobacter_sp_TB67	0.841011	0.854879	0.860556	0.860212	0.850992	0.863592	0.855936	0.85175	0.867429	0.855943	0.865404	0.858917	0.879022	0.832272	1	0.855653	0.843425	0.857116	0.864082	0.863867	0.849796	0.997647	0.859271	0.855485	0.856196	0.86265	0.831597	0.861073	0.85674	0.998293	0.852727	0.83504	0.866173	0.856865	0.862972
Psychrobacter_sp_1501_2011	0.863548	0.876737	0.841385	0.867958	0.856094	0.845731	0.85504	0.855598	0.856856	0.851371	0.864842	0.837689	0.846775	0.861882	0.855653	1	0.832237	0.866651	0.848535	0.882412	0.846394	0.856912	0.839771	0.854158	0.864766	0.852348	0.8525	0.859534	0.841966	0.855929	0.863099	0.863525	0.889737	0.851517	0.877731
Psychrobacter_urativorans	0.830417	0.843312	0.84613	0.84264	0.84386	0.84515	0.846109	0.840809	0.845227	0.85372	0.84395	0.845058	0.849392	0.830062	0.843425	0.832237	1	0.840729	0.84817	0.839599	0.847701	0.843722	0.853425	0.851293	0.840428	0.848119	0.827504	0.85035	0.853895	0.850519	0.838517	0.832865	0.836513	0.846578	0.846256
Psychrobacter_piscatorii	0.871447	0.957205	0.871966	0.96103	0.858888	0.851915	0.865341	0.853389	0.862638	0.852109	0.956684	0.867217	0.853206	0.843441	0.857116	0.866651	0.840729	1	0.852476	0.869164	0.851084	0.857681	0.849675	0.850709	0.858987	0.853754	0.835642	0.853836	0.848559	0.857183	0.852952	0.84862	0.877277	0.866595	0.864172
Psychrobacter_sp_JCM_18903	0.836441	0.849371	0.854494	0.853982	0.851169	0.856105	0.856801	0.843791	0.856084	0.862238	0.852441	0.85635	0.863909	0.834719	0.864082	0.848535	0.84817	0.852476	1	0.85794	0.853339	0.863465	0.95929	0.862509	0.84569	0.958841	0.832371	0.95914	0.856041	0.864172	0.847005	0.839751	0.860198	0.856289	0.855629
Psychrobacter_sp_TB2	0.867892	0.89544	0.865387	0.874301	0.843684	0.850329	0.847964	0.867919	0.864021	0.851009	0.879688	0.846788	0.846424	0.836307	0.863867	0.882412	0.839599	0.869164	0.85794	1	0.842413	0.863156	0.840305	0.849639	0.861729	0.848094	0.843007	0.847664	0.847605	0.859357	0.858435	0.841144	0.998008	0.855639	0.867465
Psychrobacter_aquaticus_CMS56	0.837226	0.851614	0.853633	0.85216	0.852555	0.851463	0.852114	0.843341	0.85081	0.850248	0.84983	0.852908	0.853308	0.846788	0.849796	0.846394	0.847701	0.851084	0.853339	0.842413	1	0.849961	0.851667	0.852303	0.844018	0.851931	0.827389	0.852328	0.850434	0.850018	0.843739	0.84093	0.841918	0.855645	0.846567
Psychrobacter_sp_TB47	0.84408	0.86515	0.863147	0.862731	0.851505	0.866435	0.858625	0.850087	0.867849	0.856556	0.865377	0.858689	0.878516	0.834972	0.997647	0.856912	0.843722	0.857681	0.863465	0.863156	0.849961	1	0.859176	0.85573	0.855057	0.861853	0.83453	0.863142	0.855906	0.997235	0.854916	0.837012	0.862252	0.856996	0.863337
Psychrobacter_glacincola_BNF20	0.832746	0.848162	0.852903	0.850647	0.849137	0.852473	0.853794	0.843638	0.852559	0.860558	0.847085	0.85358	0.863241	0.835978	0.859271	0.839771	0.853425	0.849675	0.95929	0.840305	0.851667	0.859176	1	0.861676	0.844063	0.960626	0.829121	0.96022	0.855843	0.859184	0.844684	0.830607	0.840496	0.853788	0.852736
Psychrobacter_sp_G	0.860435	0.8475	0.852644	0.849655	0.851656	0.859817	0.853732	0.842166	0.861741	0.96888	0.847581	0.851555	0.861507	0.840596	0.855485	0.854158	0.851293	0.850709	0.862509	0.849639	0.852303	0.85573	0.861676	1	0.847947	0.862068	0.831756	0.862591	0.893633	0.855394	0.849809	0.831897	0.853964	0.855328	0.8537
Psychrobacter_sp_Cmf_22-2	0.840586	0.847912	0.846828	0.856211	0.851673	0.862444	0.851264	0.866533	0.863178	0.847218	0.854845	0.846876	0.84632	0.844226	0.856196	0.864766	0.840428	0.858987	0.84569	0.861729	0.844018	0.855057	0.844063	0.847947	1	0.847109	0.83683	0.847398	0.845903	0.856194	0.989117	0.837123	0.873305	0.854801	0.858561
Psychrobacter_sp_JCM_18902	0.856136	0.849322	0.85321	0.851627	0.851148	0.853535	0.857546	0.842887	0.856342	0.860758	0.850457	0.854628	0.862897	0.835445	0.86265	0.852348	0.848119	0.853754	0.958841	0.848094	0.851931	0.861853	0.960626	0.862068	0.847109	1	0.828858	0.960275	0.856475	0.86269	0.848384	0.830475	0.853334	0.856427	0.854893
Psychrobacter_lutiphocae_DSM_21542	0.846785	0.833293	0.831543	0.834002	0.833163	0.834507	0.834702	0.83168	0.837582	0.833249	0.828246	0.831249	0.840788	0.852428	0.831597	0.8525	0.827504	0.835642	0.832371	0.843007	0.827389	0.83453	0.829121	0.831756	0.83683	0.828858	1	0.833643	0.830041	0.828823	0.836019	0.85797	0.839111	0.834436	0.835608
Psychrobacter_sp_P11F6	0.85453	0.850438	0.85413	0.851987	0.853747	0.855636	0.857463	0.844088	0.857053	0.860908	0.851388	0.854864	0.864678	0.839595	0.861073	0.859534	0.85035	0.853836	0.95914	0.847664	0.852328	0.863142	0.96022	0.862591	0.847398	0.960275	0.833643	1	0.85661	0.863663	0.848823	0.835021	0.846316	0.855776	0.855715
Psychrobacter_arcticus_273-4	0.847233	0.847622	0.85148	0.848889	0.847957	0.851616	0.850451	0.843793	0.85422	0.893144	0.846915	0.851315	0.855213	0.841688	0.85674	0.841966	0.853895	0.848559	0.856041	0.847605	0.850434	0.855906	0.855843	0.893633	0.845903	0.856475	0.830041	0.85661	1	0.85677	0.846463	0.837907	0.846837	0.853122	0.851789
Psychrobacter_sp_AC24	0.839583	0.868895	0.86437	0.864387	0.850439	0.867606	0.859622	0.851636	0.871356	0.859557	0.865468	0.858466	0.878422	0.858043	0.998293	0.855929	0.850519	0.857183	0.864172	0.859357	0.850018	0.997235	0.859184	0.855394	0.856194	0.86269	0.828823	0.863663	0.85677	1	0.856281	0.839068	0.862642	0.863333	0.87133
Psychrobacter_sp_ENNN9_III	0.837281	0.849922	0.845927	0.852562	0.852429	0.863261	0.851334	0.865093	0.863726	0.848156	0.854377	0.846054	0.847685	0.849134	0.852727	0.863099	0.838517	0.852952	0.847005	0.858435	0.843739	0.854916	0.844684	0.849809	0.989117	0.848384	0.836019	0.848823	0.846463	0.856281	1	0.842828	0.85806	0.854399	0.854025
Psychrobacter_phenylpyruvicus_DSM_7000	0.854817	0.839026	0.834471	0.843599	0.836617	0.834418	0.835167	0.834848	0.8381	0.835348	0.845659	0.835859	0.836702	0.999437	0.83504	0.863525	0.832865	0.84862	0.839751	0.841144	0.84093	0.837012	0.830607	0.831897	0.837123	0.830475	0.85797	0.835021	0.837907	0.839068	0.842828	1	0.842886	0.832909	0.855836
Psychrobacter_sp_TB15	0.867822	0.888143	0.865396	0.881959	0.849693	0.84913	0.851032	0.868479	0.866345	0.84896	0.884274	0.848029	0.845703	0.833741	0.866173	0.889737	0.836513	0.877277	0.860198	0.998008	0.841918	0.862252	0.840496	0.853964	0.873305	0.853334	0.839111	0.846316	0.846837	0.862642	0.85806	0.842886	1	0.859529	0.864985
Psychrobacter_sp_P11G3	0.844615	0.864236	0.938877	0.867434	0.857435	0.854742	0.94179	0.849646	0.86043	0.854903	0.864912	0.938356	0.861188	0.836482	0.856865	0.851517	0.846578	0.866595	0.856289	0.855639	0.855645	0.856996	0.853788	0.855328	0.854801	0.856427	0.834436	0.855776	0.853122	0.863333	0.854399	0.832909	0.859529	1	0.855091
Psychrobacter_sp_SHUES1	0.848333	0.858316	0.848686	0.864459	0.855127	0.855505	0.852004	0.850882	0.863249	0.855582	0.863343	0.848715	0.850742	0.845951	0.862972	0.877731	0.846256	0.864172	0.855629	0.867465	0.846567	0.863337	0.852736	0.8537	0.858561	0.854893	0.835608	0.855715	0.851789	0.87133	0.854025	0.855836	0.864985	0.855091	1

## Sheet: ANI_%Coverage
	Psychrobacter_sp_PRwf-1	Psychrobacter_sp_AntiMn-1	Psychrobacter_sp_B29-1	Psychrobacter_sp_C_20-9	Psychrobacter_alimentarius	Psychrobacter_sp_P2G3	Psychrobacter_sp_JCM_18900	Psychrobacter_sp_Rd_27-2	Psychrobacter_sp_P11G5	Psychrobacter_cryohalolentis_K5	Psychrobacter_pacificensis	Psychrobacter_sp_JCM_18901	Psychrobacter_sp_PAMC_21119	Psychrobacter_phenylpyruvicus_NBRC_102152	Psychrobacter_sp_TB67	Psychrobacter_sp_1501_2011	Psychrobacter_urativorans	Psychrobacter_piscatorii	Psychrobacter_sp_JCM_18903	Psychrobacter_sp_TB2	Psychrobacter_aquaticus_CMS56	Psychrobacter_sp_TB47	Psychrobacter_glacincola_BNF20	Psychrobacter_sp_G	Psychrobacter_sp_Cmf_22-2	Psychrobacter_sp_JCM_18902	Psychrobacter_lutiphocae_DSM_21542	Psychrobacter_sp_P11F6	Psychrobacter_arcticus_273-4	Psychrobacter_sp_AC24	Psychrobacter_sp_ENNN9_III	Psychrobacter_phenylpyruvicus_DSM_7000	Psychrobacter_sp_TB15	Psychrobacter_sp_P11G3	Psychrobacter_sp_SHUES1
Psychrobacter_sp_PRwf-1	1	0.0365614	0.0255617	0.0267386	0.0269555	0.0226643	0.026291	0.0241126	0.0326767	0.0243952	0.0277998	0.0239508	0.0256819	0.163151	0.020827	0.175383	0.0163956	0.0315203	0.0282072	0.0266972	0.0209379	0.0216609	0.0247045	0.0303632	0.0223519	0.0305037	0.0902012	0.030501	0.0332123	0.0207563	0.0226126	0.162644	0.0261096	0.0298408	0.037261
Psychrobacter_sp_AntiMn-1	0.0383079	1	0.482063	0.840361	0.242283	0.148691	0.465476	0.222837	0.147975	0.183997	0.904023	0.502448	0.258597	0.0221783	0.211335	0.02685	0.0903441	0.849228	0.238661	0.178871	0.248946	0.241185	0.229912	0.179877	0.139017	0.252986	0.020976	0.237588	0.194943	0.25698	0.140527	0.0219909	0.154416	0.462813	0.199683
Psychrobacter_sp_B29-1	0.0273047	0.491457	1	0.514613	0.217905	0.17627	0.817171	0.186402	0.175277	0.20033	0.507801	0.854197	0.317008	0.0236613	0.245654	0.0238671	0.0907548	0.519981	0.266446	0.118206	0.25733	0.262572	0.265172	0.195575	0.147392	0.280989	0.018732	0.25876	0.208368	0.267598	0.146968	0.022938	0.116812	0.82278	0.198705
Psychrobacter_sp_C_20-9	0.0280606	0.841704	0.505582	1	0.261385	0.15375	0.490688	0.208791	0.15346	0.196663	0.876609	0.512369	0.254711	0.019415	0.231021	0.0276964	0.0945562	0.879818	0.250432	0.14301	0.271726	0.246837	0.233695	0.191925	0.157224	0.256009	0.0193869	0.240231	0.20519	0.25603	0.148101	0.0213131	0.14971	0.50201	0.206891
Psychrobacter_alimentarius	0.0301451	0.258599	0.228133	0.278541	1	0.150893	0.241026	0.164798	0.159574	0.200593	0.260808	0.250925	0.19947	0.0204015	0.195443	0.0247578	0.101731	0.275619	0.247558	0.0862459	0.380333	0.19301	0.246025	0.193299	0.133771	0.276742	0.0188441	0.251218	0.207729	0.194161	0.129067	0.0195784	0.0902449	0.24974	0.19732
Psychrobacter_sp_P2G3	0.025476	0.159517	0.185489	0.164681	0.151666	1	0.180808	0.167329	0.885795	0.224002	0.164645	0.182807	0.229779	0.0219286	0.260283	0.025313	0.129717	0.164509	0.23393	0.0940577	0.188762	0.271093	0.217661	0.210313	0.579349	0.238744	0.0191892	0.221984	0.23132	0.27493	0.583807	0.0214277	0.0884297	0.185333	0.201058
Psychrobacter_sp_JCM_18900	0.0287277	0.48543	0.835911	0.510907	0.235499	0.175761	1	0.178271	0.176661	0.205912	0.496437	0.877281	0.342005	0.0213637	0.232772	0.0244904	0.0973059	0.519162	0.271344	0.0952554	0.261326	0.248081	0.257918	0.199717	0.147489	0.3014	0.0177566	0.277919	0.21558	0.252869	0.147643	0.0205655	0.089003	0.867644	0.183112
Psychrobacter_sp_Rd_27-2	0.0247442	0.218248	0.179073	0.204165	0.151221	0.15276	0.167423	1	0.140944	0.162122	0.224331	0.18851	0.173805	0.0189921	0.205832	0.0216179	0.0777127	0.20573	0.208891	0.170803	0.180759	0.201817	0.210824	0.158465	0.214894	0.222693	0.018663	0.214481	0.178117	0.206534	0.220614	0.0185458	0.170284	0.173142	0.237939
Psychrobacter_sp_P11G5	0.0383947	0.165941	0.192801	0.171818	0.167659	0.925927	0.189967	0.16138	1	0.225234	0.174918	0.185854	0.236164	0.0216619	0.279609	0.0272543	0.131444	0.178877	0.242238	0.106574	0.195969	0.280303	0.218602	0.226941	0.589905	0.257358	0.016982	0.236757	0.234903	0.293467	0.581876	0.0213886	0.104875	0.191018	0.2232
Psychrobacter_cryohalolentis_K5	0.025259	0.181826	0.194182	0.194033	0.18572	0.206335	0.195118	0.163578	0.198478	1	0.187899	0.199143	0.249048	0.0190242	0.250669	0.0243766	0.158554	0.197544	0.317292	0.10966	0.219313	0.251094	0.297922	0.921781	0.168897	0.315038	0.0179719	0.302538	0.769404	0.278409	0.168809	0.0188825	0.0925855	0.202727	0.324106
Psychrobacter_pacificensis	0.0284266	0.882262	0.486104	0.854143	0.238471	0.149776	0.464571	0.223535	0.152225	0.185565	1	0.493897	0.24865	0.0214197	0.234796	0.0286909	0.0976098	0.851641	0.242641	0.144379	0.253044	0.236292	0.230277	0.180133	0.140523	0.253933	0.0195273	0.237395	0.197582	0.236526	0.145247	0.0232204	0.149093	0.479529	0.205866
Psychrobacter_sp_JCM_18901	0.0251565	0.503682	0.839926	0.512808	0.235671	0.170818	0.843286	0.192947	0.166139	0.202015	0.507322	1	0.324905	0.0223826	0.23294	0.0254549	0.10054	0.52195	0.275225	0.0924281	0.267647	0.232544	0.262292	0.19864	0.14782	0.28249	0.0175481	0.26861	0.206863	0.232041	0.146328	0.0217869	0.0913317	0.834644	0.198955
Psychrobacter_sp_PAMC_21119	0.0301037	0.2893	0.347868	0.284499	0.209075	0.239614	0.366884	0.19853	0.235599	0.281944	0.285033	0.362591	1	0.0226012	0.604921	0.0263025	0.112213	0.297988	0.420281	0.0843868	0.285553	0.605517	0.384152	0.271535	0.18803	0.428982	0.0217241	0.414799	0.278565	0.603731	0.184069	0.019816	0.0822436	0.360783	0.260155
Psychrobacter_phenylpyruvicus_NBRC_102152	0.166437	0.0215935	0.022597	0.0188729	0.0186103	0.0199013	0.0199453	0.0188801	0.0188071	0.0187437	0.0213692	0.021739	0.0196698	1	0.0184433	0.313236	0.0164055	0.0205538	0.0197572	0.020698	0.0140302	0.0191181	0.0176198	0.0197791	0.0154728	0.0189938	0.0833939	0.0173707	0.0241042	0.0330864	0.0161308	0.98582	0.0198416	0.023705	0.022771
Psychrobacter_sp_TB67	0.0249338	0.241473	0.27532	0.263545	0.209225	0.277216	0.255034	0.24013	0.284892	0.289835	0.274896	0.265506	0.617829	0.0216442	1	0.0264639	0.122064	0.259302	0.40944	0.141578	0.269938	1.04868	0.358714	0.28005	0.233603	0.400296	0.017317	0.362524	0.338014	1.05243	0.22292	0.0226649	0.142518	0.252527	0.346697
Psychrobacter_sp_1501_2011	0.189424	0.0276774	0.0241323	0.0285043	0.0239105	0.024322	0.0242073	0.0227526	0.0250524	0.0254278	0.0303045	0.026175	0.0242355	0.331634	0.0238747	1	0.0180902	0.0280684	0.0295234	0.0251323	0.0195442	0.0242956	0.018929	0.0276692	0.0176583	0.0271314	0.0815095	0.023233	0.0271449	0.0240958	0.0186414	0.334632	0.0275166	0.0319131	0.0369243
Psychrobacter_urativorans	0.0160482	0.084398	0.083161	0.0881919	0.0890396	0.112955	0.087165	0.0741245	0.109498	0.149887	0.0934346	0.093693	0.0937017	0.0157408	0.0997986	0.0163944	1	0.0939234	0.119026	0.0649943	0.0922656	0.101115	0.1209	0.144813	0.0847336	0.120318	0.016249	0.118549	0.163861	0.11518	0.0883828	0.0172269	0.059453	0.088607	0.125903
Psychrobacter_piscatorii	0.0325123	0.83602	0.502109	0.864752	0.254213	0.150959	0.490079	0.206789	0.157029	0.196793	0.859075	0.512573	0.262219	0.0207821	0.223409	0.0268058	0.098977	1	0.254574	0.135833	0.271965	0.223972	0.237755	0.189462	0.147481	0.262805	0.0184366	0.250678	0.21064	0.225457	0.142636	0.0231139	0.14412	0.507225	0.211337
Psychrobacter_sp_JCM_18903	0.0322843	0.260704	0.285492	0.273126	0.253361	0.238193	0.284222	0.232983	0.235961	0.350736	0.27159	0.299909	0.410374	0.0221665	0.391435	0.0312861	0.13918	0.28248	1	0.117695	0.341177	0.383889	0.843948	0.344712	0.1946	0.907449	0.0207121	0.853851	0.340799	0.391544	0.196275	0.0237804	0.120485	0.292097	0.333382
Psychrobacter_sp_TB2	0.0270376	0.172892	0.112071	0.138009	0.0781037	0.0847435	0.088287	0.168566	0.0918584	0.10726	0.142996	0.08912	0.0729096	0.0205481	0.119767	0.023566	0.067248	0.133367	0.104142	1	0.0785771	0.124602	0.072125	0.0937415	0.112142	0.09995	0.0163935	0.0945972	0.110263	0.124048	0.114088	0.0220464	1.04095	0.0968419	0.135168
Psychrobacter_aquaticus_CMS56	0.0224854	0.255156	0.258708	0.278061	0.365226	0.18034	0.256835	0.189164	0.179111	0.227468	0.265754	0.273652	0.261615	0.0147697	0.242142	0.0194329	0.10123	0.283154	0.320122	0.0833223	1	0.241875	0.314694	0.231901	0.151121	0.337714	0.0183797	0.319021	0.253671	0.24218	0.151938	0.0149571	0.0813325	0.257365	0.215694
Psychrobacter_sp_TB47	0.0256323	0.272394	0.290879	0.278332	0.204232	0.285391	0.268665	0.232724	0.282297	0.28697	0.27345	0.261991	0.611288	0.0221767	1.03656	0.0266191	0.122244	0.256949	0.396904	0.145591	0.266524	1	0.354193	0.276595	0.22717	0.390625	0.0179304	0.370279	0.317599	1.0618	0.229957	0.0234124	0.139685	0.249626	0.343861
Psychrobacter_glacincola_BNF20	0.0287922	0.255738	0.28932	0.259531	0.256394	0.225679	0.275097	0.239436	0.21683	0.335343	0.262462	0.29104	0.381953	0.0201298	0.349209	0.0204258	0.143955	0.26864	0.859375	0.0830008	0.341523	0.348841	1	0.348014	0.190515	0.890939	0.0205172	0.847736	0.322778	0.349523	0.191397	0.0194193	0.0816129	0.289218	0.316342
Psychrobacter_sp_G	0.0315691	0.178494	0.190362	0.190146	0.179711	0.194532	0.190035	0.160554	0.200814	0.925616	0.183158	0.19663	0.240851	0.0201586	0.243214	0.0266358	0.153824	0.190975	0.31314	0.0962375	0.224517	0.243023	0.310465	1	0.154846	0.330056	0.0186265	0.312928	0.7759	0.243439	0.155393	0.0189903	0.0990358	0.201012	0.331939
Psychrobacter_sp_Cmf_22-2	0.0238076	0.14132	0.14697	0.159574	0.127408	0.548975	0.143769	0.223048	0.534751	0.173745	0.146375	0.149901	0.170859	0.0161552	0.207836	0.0174142	0.0922063	0.152293	0.181098	0.117942	0.149885	0.204476	0.174113	0.158631	1	0.178712	0.0147367	0.169374	0.162895	0.208479	0.986633	0.0158144	0.128394	0.160748	0.179799
Psychrobacter_sp_JCM_18902	0.033348	0.263967	0.287581	0.266695	0.270536	0.232199	0.301555	0.237245	0.239454	0.332636	0.27149	0.294029	0.400097	0.020355	0.365542	0.0274627	0.134385	0.278544	0.86678	0.107894	0.343795	0.360883	0.835732	0.347049	0.183429	1	0.0214681	0.858315	0.321313	0.366273	0.186936	0.0196136	0.113428	0.30118	0.325303
Psychrobacter_lutiphocae_DSM_21542	0.0956512	0.0212293	0.0185958	0.0195897	0.0178683	0.0181027	0.0172322	0.0192855	0.0153262	0.0184061	0.0202506	0.0177165	0.019653	0.0866867	0.0153387	0.0800275	0.0176038	0.018954	0.0191898	0.0171652	0.0181488	0.0160678	0.018668	0.0189974	0.0146716	0.0208235	1	0.018969	0.0261037	0.0148853	0.014555	0.0930078	0.0146933	0.0185089	0.0246438
Psychrobacter_sp_P11F6	0.0357961	0.266121	0.284295	0.268652	0.263635	0.231767	0.2985	0.245291	0.236478	0.342918	0.272464	0.300133	0.415305	0.0199838	0.355382	0.0252453	0.142141	0.285219	0.875531	0.109622	0.348637	0.36723	0.853656	0.353225	0.186623	0.921403	0.0209936	1	0.329732	0.373546	0.188578	0.0193831	0.101473	0.308504	0.31668
Psychrobacter_arcticus_273-4	0.0293938	0.164664	0.17264	0.173043	0.164394	0.182129	0.17461	0.153615	0.176935	0.657657	0.171009	0.174305	0.210325	0.0209117	0.249879	0.0222433	0.148161	0.180734	0.263526	0.0963569	0.209055	0.237533	0.245111	0.660462	0.135352	0.260116	0.0217861	0.248655	1	0.244967	0.134129	0.0211381	0.0933074	0.173718	0.280471
Psychrobacter_sp_AC24	0.0247722	0.292717	0.298984	0.29117	0.207208	0.291908	0.276194	0.240203	0.298085	0.320912	0.276064	0.263662	0.614704	0.0387082	1.04917	0.0266262	0.14044	0.260867	0.408285	0.146185	0.269145	1.07089	0.357924	0.279441	0.233601	0.399854	0.0167531	0.379872	0.330343	1	0.235933	0.0227669	0.145579	0.277316	0.397098
Psychrobacter_sp_ENNN9_III	0.0225669	0.13385	0.137308	0.140838	0.115177	0.518324	0.134847	0.214549	0.494219	0.162707	0.141757	0.139033	0.156715	0.0157804	0.185827	0.0172247	0.0901139	0.138004	0.171142	0.112424	0.141196	0.193935	0.163892	0.149155	0.924432	0.170646	0.013698	0.160358	0.151248	0.197286	1	0.0150372	0.109178	0.149444	0.165075
Psychrobacter_phenylpyruvicus_DSM_7000	0.168238	0.0217101	0.0222122	0.0210074	0.018109	0.0197183	0.0194684	0.018694	0.0188293	0.018864	0.0234893	0.021456	0.0174867	0.999591	0.0195829	0.320484	0.0182052	0.0231793	0.0214918	0.0225176	0.0144067	0.0204654	0.0172353	0.0188931	0.0153581	0.0185577	0.0907248	0.0170839	0.0247055	0.0197321	0.0155858	1	0.0223973	0.0234259	0.0257861
Psychrobacter_sp_TB15	0.0267355	0.150909	0.111977	0.146076	0.0826307	0.0805556	0.0834059	0.169916	0.0913958	0.0915628	0.1493	0.0890386	0.0718452	0.0199161	0.121897	0.0260877	0.0621962	0.143072	0.107793	1.05248	0.0775505	0.120872	0.0717047	0.097536	0.123433	0.10624	0.0141882	0.0885358	0.107956	0.124903	0.112021	0.0221717	1	0.0933392	0.121709
Psychrobacter_sp_P11G3	0.0327083	0.484159	0.844275	0.524326	0.244776	0.180722	0.870351	0.184936	0.178192	0.21461	0.514019	0.871	0.337367	0.0254699	0.231203	0.0323869	0.0992243	0.539002	0.279732	0.104812	0.262681	0.23122	0.272003	0.211911	0.165421	0.301965	0.0191315	0.288129	0.215147	0.254688	0.164136	0.0248233	0.0999135	1	0.209631
Psychrobacter_sp_SHUES1	0.0387606	0.198249	0.193507	0.205078	0.183543	0.186066	0.174324	0.241198	0.197605	0.325621	0.20943	0.197043	0.230875	0.0232198	0.301248	0.0355633	0.133806	0.213135	0.303003	0.138838	0.208933	0.302279	0.282354	0.332108	0.175598	0.309533	0.024175	0.280696	0.329661	0.346114	0.172067	0.0259321	0.123644	0.19895	1
