# Supplementary material for: Comparative genomic analysis of a new tellurite-resistant Psychrobacter strain isolated from the Antarctic Peninsula
Source: PeerJ. 2018 Feb 19;6:e4402. doi: 10.7717/peerj.4402 (PMC5822837; doi:10.7717/peerj.4402)
Supplement: Table S3 [file peerj-06-4402-s003.xlsx]

## Sheet: Psychrobacter_BacMet-count
Table S3. Metal(loid) resistance genes in the indicated Psychrobacter species.
BacMet	Gene	Description	P. alimentarius	P. aquaticus CMS56	P. arcticus 273-4	P. cryohalolentis K5	P. glacincola BNF20	P. lutiphocae DSM 21542	P. pacificensis	P. phenylpyruvicus DSM 7000	P. phenylpyruvicus NBRC 102152	P. piscatorii	P. sp. 1501 2011	P. sp. AC24	P. sp. AntiMn-1	P. sp. B29-1	P. sp. C 20-9	P. sp. Cmf 22-2	P. sp. ENNN9 III	P. sp. G	P. sp. JCM 18900	P. sp. JCM 18901	P. sp. JCM 18902	P. sp. JCM 18903	P. sp. P11F6	P. sp. P11G3	P. sp. P11G5	P. sp. P2G3	P. sp. PAMC 21119	P. sp. PRwf-1	P. sp. Rd 27-2	P. sp. SHUES1	P. sp. TB15	P. sp. TB2	P. sp. TB47	P. sp. TB67	P. urativorans
BAC0003	acn	Aconitate hydratase	2	2	2	2	2	2	2	2	2	2	3	2	2	2	2	2	2	2	6	6	6	4	2	2	2	2	2	2	2	2	2	2	2	2	2
BAC0563	acrD	RND family aminoglycoside/multidrug efflux pump	1	1	1	1	1	1	1	1	1	1	1	1	1	1	1	1	1	1	2	2	1	3	1	1	1	1	1	1	1	1	1	1	1	1	1
BAC0012	actP	Copper-transporting P-type ATPase	0	0	0	0	0	0	0	0	0	0	0	0	0	0	0	0	0	1	0	0	0	1	0	0	0	0	0	0	0	0	0	0	0	0	0
BAC0568	actP	Copper-transporting P-type ATPase	0	0	0	0	0	0	0	0	0	0	0	0	0	0	0	0	0	0	0	0	1	1	0	0	0	0	0	0	0	0	0	0	0	0	0
BAC0570	actP	Cation/acetate symporter ActP-1	1	1	1	1	1	1	1	1	1	1	1	1	1	1	1	1	1	1	1	2	1	1	1	1	1	1	1	1	1	1	1	1	1	1	1
BAC0565	actR	Acid tolerance regulatory protein ActR	2	0	0	0	2	0	0	0	0	0	0	0	0	0	0	1	1	1	0	0	0	1	0	0	1	1	1	1	0	0	0	0	0	0	0
BAC0020	aioA/aoxB	Arsenite oxidase subunit AioA	1	1	1	1	1	1	1	1	1	1	1	1	1	1	1	1	1	1	1	1	1	1	1	1	1	1	1	1	1	1	1	1	1	1	1
BAC0022	aioR/aoxR	Putative transcriptional regulator	0	0	0	0	0	0	0	2	0	0	1	0	0	0	0	0	0	0	0	0	1	0	0	0	1	0	1	1	0	1	1	1	0	0	1
BAC0030	arsA	Arsenical pump-driving ATPase	0	0	0	0	0	0	0	0	0	0	1	0	0	0	0	0	0	0	0	0	0	0	0	0	0	0	0	0	0	0	0	0	0	0	0
BAC0571	arsA	Arsenical pump-driving ATPase	1	0	1	1	1	1	0	1	1	1	0	1	0	1	0	1	1	1	1	0	1	1	1	0	0	1	1	1	0	1	0	0	1	1	0
BAC0572	arsA	Arsenical pump-driving ATPase	0	1	0	0	0	0	1	0	0	0	0	0	1	0	1	0	0	0	0	1	0	0	0	1	1	0	0	0	1	0	1	1	0	0	0
BAC0031	arsB	Arsenical pump membrane protein	0	0	0	0	0	0	0	0	0	0	0	0	0	0	0	0	0	0	1	1	1	1	0	0	0	0	0	0	0	0	0	0	0	0	0
BAC0573	arsB	Arsenite resistance protein ArsB	0	0	0	0	0	1	0	1	1	0	0	0	0	0	0	0	0	0	0	0	0	0	0	0	0	0	0	0	0	0	0	0	0	0	0
BAC0574	arsB	Arsenical pump membrane protein	0	0	0	0	0	0	0	0	0	0	0	0	0	0	0	0	0	0	0	1	0	0	0	0	0	0	0	0	0	0	0	0	0	0	0
BAC0575	arsB	Arsenical pump membrane protein	0	0	0	0	0	0	0	0	0	0	0	0	0	0	0	0	0	0	1	0	0	0	0	0	0	0	0	0	0	0	0	0	0	0	0
BAC0576	arsB	Arsenical pump membrane protein	0	0	0	0	0	1	0	1	1	0	1	0	0	0	0	0	0	0	0	0	0	0	0	0	0	0	0	1	0	0	0	0	0	0	0
BAC0577	arsB	Arsenical pump membrane protein	0	0	0	0	0	0	0	0	0	0	0	0	0	0	0	0	0	0	1	1	1	1	0	0	0	0	0	0	0	0	0	0	0	0	0
BAC0578	arsB	ArsB	1	1	1	1	1	0	1	0	0	1	0	1	1	1	1	1	1	1	0	0	0	0	1	1	1	1	1	0	1	1	1	1	1	1	1
BAC0032	arsC	Protein ArsC	1	1	0	0	1	0	1	1	1	0	1	0	0	0	0	1	1	0	0	0	1	1	1	0	1	1	0	1	0	0	0	0	0	0	0
BAC0580	arsC	Protein ArsC	0	0	1	1	0	1	0	0	0	1	0	0	0	0	0	0	0	1	0	0	0	0	0	0	0	0	0	0	1	1	0	0	0	0	1
BAC0581	arsC	Protein ArsC	0	0	0	0	0	0	0	1	1	0	1	0	1	0	1	0	0	0	0	0	0	0	0	0	0	0	0	0	0	0	1	1	0	0	0
BAC0582	arsC	Arsenate reductase	0	0	0	0	0	0	0	0	0	0	0	1	0	0	0	0	0	1	0	0	0	1	1	0	1	1	1	0	1	1	1	1	1	1	0
BAC0583	arsC	Arsenate reductase	1	1	0	0	1	0	0	0	0	0	0	0	0	0	1	0	0	0	0	0	0	0	0	0	0	0	0	0	0	0	0	0	0	0	0
BAC0584	arsC	Arsenate reductase	0	0	1	1	0	1	1	1	1	1	0	0	1	1	0	1	1	0	1	1	1	0	0	1	0	0	0	1	0	0	0	0	0	0	0
BAC0034	arsH	Arsenic resistance protein ArsH	1	1	1	1	1	0	1	1	1	1	1	1	1	1	1	1	1	1	1	2	1	1	1	1	1	1	1	1	1	1	1	1	1	1	1
BAC0035	arsM	UbiE/COQ5 methyltransferase	1	1	3	1	1	1	1	1	1	1	1	2	1	2	1	1	1	2	1	3	1	1	1	2	2	2	2	1	1	1	1	1	2	2	1
BAC0588	arsR	Arsenite inducible repressor	0	0	0	0	0	1	0	1	1	0	0	0	0	1	0	0	0	0	0	0	0	0	0	0	0	0	0	0	0	0	0	0	0	0	0
BAC0589	arsR	Arsenical resistance operon repressor	1	1	0	0	0	0	0	0	0	0	1	0	0	0	0	1	1	0	0	0	0	0	0	0	1	1	0	0	1	1	0	0	0	0	0
BAC0591	arsR	Arsenical resistance operon repressor	0	0	0	0	0	0	0	0	0	0	0	0	0	0	0	0	0	0	0	0	0	0	0	0	0	0	0	1	0	0	0	0	0	0	0
BAC0593	arsR	Arsenical resistance operon repressor	0	0	0	0	0	0	0	0	0	0	0	0	0	0	0	0	0	0	0	1	0	0	0	0	0	0	0	0	0	0	0	0	0	0	0
BAC0594	arsR	Arsenical resistance operon repressor	0	1	1	1	1	0	1	0	0	1	0	1	1	1	1	0	0	1	1	0	1	1	1	1	0	0	1	0	0	0	1	1	1	1	1
BAC0039	baeR	Transcriptional regulatory protein BaeR	1	1	1	1	1	2	1	1	1	1	1	1	1	1	1	1	0	1	3	1	2	1	1	1	1	1	1	2	1	1	1	1	1	1	1
BAC0596	baeR	DNA-binding transcriptional regulator BaeR	1	1	0	0	0	0	0	0	0	0	0	0	0	0	1	1	1	0	0	2	0	0	0	0	0	1	0	0	0	0	0	0	0	0	2
BAC0040	baeS	Signal transduction histidine-protein kinase BaeS	1	1	1	1	1	1	1	1	1	1	2	1	1	1	1	1	1	1	1	1	1	0	1	1	1	1	1	1	1	1	1	1	1	1	1
BAC0597	baeS	Signal transduction histidine-protein kinase BaeS	0	0	0	0	0	0	0	0	0	0	0	0	0	0	0	0	1	0	0	0	0	0	0	0	0	1	0	0	0	0	1	1	0	0	0
BAC0048	bfrA	Bacterioferritin	2	2	2	2	2	2	2	2	2	2	2	2	2	2	2	2	2	2	1	1	2	1	2	2	2	2	2	2	2	2	2	2	2	2	2
BAC0055	cadA/yvgW	Cadmium, zinc and cobalt-transporting ATPase	0	0	0	0	0	0	0	0	0	0	0	0	0	0	0	0	0	0	0	0	0	1	0	0	0	0	0	0	0	0	0	0	0	0	0
BAC0056	cadC	Cadmium resistance transcriptional regulatory protein CadC	0	0	0	0	0	1	0	0	0	0	0	0	0	0	0	0	0	0	0	0	0	0	0	0	0	0	0	0	0	0	0	0	0	0	0
BAC0058	cadR	CadR	1	0	0	1	0	0	1	0	0	1	1	1	0	1	1	2	2	1	2	0	2	2	2	3	2	2	0	0	1	3	2	1	1	1	0
BAC0026	chrA	Chromate transporter	0	1	0	1	0	0	0	0	0	0	0	0	0	0	0	0	0	1	0	0	0	0	0	0	0	1	0	0	0	0	0	0	0	0	0
BAC0361	chrI	ChrI, regulatory protein, involved in Chromate resistance	1	0	1	1	1	0	1	0	0	1	1	1	1	1	1	1	1	1	1	1	1	1	1	1	2	1	1	1	0	1	0	0	1	1	1
BAC0538	chrR	Chromate reductase	1	0	0	0	1	2	0	1	1	0	0	1	0	0	0	0	0	0	0	0	1	1	1	0	1	1	0	1	0	0	0	0	1	1	1
BAC0068	cmeA	CmeA	1	1	1	1	1	1	1	2	2	1	1	1	1	1	1	1	1	1	0	1	1	2	1	1	1	1	1	1	1	1	1	1	1	1	2
BAC0613	cmeB	CmeB	0	0	0	0	0	0	0	0	0	0	0	0	0	0	0	0	0	0	0	0	1	0	0	0	0	0	0	0	0	0	0	0	0	0	0
BAC0071	cmtR	HTH-type transcriptional regulator CmtR	0	0	0	0	0	0	0	0	0	0	0	0	0	0	0	1	0	0	1	0	0	0	0	0	1	1	0	0	0	0	1	1	0	0	0
BAC0074	cnrT	CnrT, Cation Diffusion Facilitator, involved in Co(II), Ni(II) resistance	1	1	0	0	0	0	1	0	0	1	0	0	1	0	1	0	0	0	0	0	0	0	0	0	0	0	0	0	0	0	0	0	0	0	0
BAC0076	comR/ycfQ	HTH-type transcriptional repressor ComR	0	1	1	1	1	0	1	0	0	0	0	1	1	1	1	1	1	2	1	1	1	1	1	1	1	1	1	1	1	1	1	1	1	1	1
BAC0077	copA	Copper resistance protein A	0	0	0	0	0	0	0	0	0	0	1	0	0	0	0	0	0	0	1	3	0	0	0	0	0	0	0	0	0	0	0	0	0	0	0
BAC0078	copA	Copper-exporting P-type ATPase A	0	0	0	0	0	1	0	0	0	0	0	0	0	0	0	0	0	0	0	0	1	1	0	0	0	0	0	0	0	0	0	0	0	0	0
BAC0619	copA	CopA	0	0	0	0	0	0	0	0	0	0	0	0	0	0	0	0	0	0	0	0	0	0	0	0	0	0	0	0	0	1	0	0	0	0	0
BAC0620	copA	Probable copper-importing P-type ATPase A	0	0	0	0	0	0	0	1	1	0	0	0	0	1	0	0	0	0	0	1	0	1	0	0	0	0	0	0	0	0	1	1	0	0	0
BAC0624	copA	Copper-transporting ATPase	0	0	0	0	0	0	0	0	0	0	0	0	1	0	0	0	0	0	0	0	0	0	0	1	0	0	0	0	0	0	0	0	0	0	0
BAC0625	copA	Copper resistance protein A	0	0	0	0	0	0	0	0	0	0	0	0	0	0	0	0	0	0	1	1	0	0	0	0	0	0	0	0	0	0	0	0	0	0	0
BAC0079	copB	Copper-exporting P-type ATPase B	0	0	0	0	0	0	0	0	0	0	0	0	0	0	0	0	0	0	0	0	0	0	0	1	0	0	0	0	0	0	0	0	0	0	0
BAC0626	copB	Copper resistance protein B	0	0	0	0	0	0	0	0	0	0	0	0	0	0	0	0	0	0	0	0	0	0	0	0	0	0	0	0	1	0	1	1	0	0	0
BAC0627	copB	Copper resistance protein B	0	0	0	0	0	0	0	0	0	0	0	0	1	0	0	0	0	0	1	1	0	0	0	0	0	0	0	0	0	0	1	1	0	0	0
BAC0628	copB	CopB	1	1	1	1	0	0	1	0	0	1	1	1	1	1	1	1	1	1	1	1	1	0	1	1	1	1	1	1	0	0	0	0	1	1	0
BAC0629	copB	Copper-exporting P-type ATPase B	0	0	0	0	1	0	0	0	0	0	0	0	0	0	0	0	0	0	0	1	0	0	0	0	1	1	0	0	0	0	0	0	0	0	0
BAC0631	copC	CopC	0	0	0	0	1	0	0	0	0	0	0	0	0	0	0	0	0	0	0	0	1	1	1	0	0	0	0	0	0	0	0	0	0	0	0
BAC0080	copJ	CopJ protein	0	0	1	1	1	0	0	1	1	0	0	1	0	1	0	1	1	1	1	0	1	1	1	1	1	1	1	1	1	0	1	1	1	1	1
BAC0083	copR	Transcriptional activator protein CopR	1	1	3	2	1	0	2	1	1	3	0	2	2	3	1	3	3	2	1	1	0	1	1	3	2	2	3	0	1	2	3	3	2	2	1
BAC0638	copR	CopR	1	0	3	0	0	0	0	0	0	0	0	0	0	0	0	0	0	0	0	1	0	0	0	0	1	0	0	0	0	0	0	0	0	0	0
BAC0537	copS	Sensor protein CopS	0	0	0	0	0	0	0	0	0	0	0	0	0	0	0	0	0	0	1	0	0	0	0	0	0	0	0	0	0	0	0	0	0	0	0
BAC0637	copS	CopS	1	1	1	1	1	0	1	0	0	1	1	0	1	1	1	1	1	1	1	2	1	1	1	1	1	1	0	1	1	1	0	0	0	0	0
BAC0086	corA	Magnesium transport protein CorA	1	1	1	1	1	1	1	1	1	1	1	1	1	1	1	0	1	1	0	1	0	0	1	1	1	1	0	0	1	0	1	1	1	1	0
BAC0641	corA	Magnesium transport protein CorA	0	0	0	0	0	0	0	0	0	0	0	0	0	0	0	1	0	0	1	0	1	1	0	0	0	0	1	1	0	1	0	0	0	0	1
BAC0643	corB	CorB	0	0	0	0	0	0	0	0	0	0	0	0	0	0	0	0	0	0	0	0	0	0	0	0	0	0	0	0	0	0	0	0	0	0	1
BAC0088	corC	Magnesium and cobalt efflux protein CorC	1	1	1	1	1	1	1	1	1	1	1	1	1	2	1	1	1	1	1	1	1	1	1	1	1	1	1	1	1	1	1	1	1	1	1
BAC0089	corR	Sigma-54 dependent DNA-binding response regulator	2	1	2	0	1	1	0	0	0	0	1	1	0	1	0	0	0	0	1	2	0	2	3	0	1	0	1	2	1	0	0	0	1	1	1
BAC0091	corS	Sensor histidine kinase	0	0	0	0	0	0	0	0	0	0	0	0	0	1	0	0	0	0	1	0	0	0	0	0	0	0	0	0	0	0	1	1	0	0	0
BAC0095	crdR	Response regulator	0	0	0	0	0	0	0	0	0	1	0	0	0	0	0	0	0	0	0	0	1	0	0	1	0	1	0	0	0	0	0	0	0	0	0
BAC0098	ctpC	Probable manganese/zinc-exporting P-type ATPase	0	0	0	0	0	0	0	0	0	0	0	0	0	0	0	0	0	0	0	1	0	0	0	0	0	0	0	0	0	0	0	0	0	0	0
BAC0099	ctpD	Probable cobalt/nickel-exporting P-type ATPase	0	0	0	0	0	0	0	0	0	0	0	0	0	0	0	0	0	0	0	0	1	0	0	0	0	0	0	0	0	1	0	0	0	0	0
BAC0100	ctpG	Probable cation-transporting ATPase G	0	0	0	0	0	0	0	0	0	0	0	0	0	0	0	0	0	0	0	0	0	1	0	0	0	0	0	0	0	0	0	0	0	0	0
BAC0101	ctpV	Probable copper-exporting P-type ATPase V	0	0	0	0	0	0	0	1	1	1	1	1	0	1	0	0	1	1	0	0	0	0	0	1	0	0	1	1	1	1	0	0	1	1	0
BAC0102	cueA	Copper transporter	0	1	0	0	1	1	1	0	0	1	0	1	1	0	1	0	0	1	1	1	1	1	1	0	0	0	1	0	1	0	0	0	1	1	1
BAC0105	cueR/ybbI	HTH-type transcriptional regulator CueR	0	0	0	0	0	0	1	0	0	1	0	0	0	0	1	0	0	0	0	0	0	0	0	0	0	0	0	0	0	1	0	0	0	0	0
BAC0109	cusC/ylcB	Cation efflux system protein CusC	1	1	1	1	1	1	1	1	1	1	1	1	1	1	1	1	1	1	1	1	1	1	1	1	1	1	1	1	1	1	1	1	1	1	1
BAC0111	cusR/ylcA	Transcriptional regulatory protein CusR	1	1	1	1	1	0	0	0	0	1	1	1	0	1	0	1	1	1	0	1	3	2	2	0	2	2	0	1	1	1	1	1	1	1	0
BAC0112	cusS	Sensor kinase CusS	0	0	0	0	0	0	0	0	0	0	0	1	0	0	0	0	0	1	0	0	0	0	0	0	0	0	1	0	0	0	1	1	1	1	0
BAC0113	cutA	Divalent-cation tolerance protein CutA	0	0	0	0	0	0	0	0	0	0	0	0	0	0	0	0	0	0	0	0	0	0	0	0	0	0	0	0	0	0	1	1	0	0	0
BAC0115	cutE/lnt	Apolipoprotein N-acyltransferase	1	1	1	1	1	1	1	1	1	2	2	2	1	1	1	1	1	1	1	1	1	2	1	2	1	1	1	1	1	2	1	1	2	2	1
BAC0116	cutF/nlpE	Lipoprotein NlpE	0	1	1	1	0	0	1	0	0	1	0	1	1	0	1	1	1	1	0	0	0	0	0	0	0	0	1	0	0	1	1	1	1	1	1
BAC0119	czcA	Cobalt-zinc-cadmium resistance protein CzcA	0	0	0	0	0	0	1	0	0	0	0	1	0	1	0	0	0	0	0	0	0	0	0	0	1	0	0	0	0	0	1	1	1	1	0
BAC0120	czcB	Cobalt-zinc-cadmium resistance protein CzcB	0	0	0	0	0	0	1	0	0	0	0	1	0	1	0	0	0	0	0	0	0	0	0	0	1	0	0	0	0	0	1	1	1	1	0
BAC0121	czcC	Cobalt-zinc-cadmium resistance protein CzcC	0	0	0	0	0	0	1	1	1	0	1	1	0	1	0	0	0	0	0	0	0	0	0	0	1	0	0	1	0	0	1	1	1	1	0
BAC0122	czcD	Cobalt-zinc-cadmium resistance protein CzcD	1	1	0	1	1	1	2	1	1	1	1	1	1	1	1	1	1	1	2	1	1	0	1	1	1	1	1	1	1	1	1	1	1	1	1
BAC0125	czcR	Transcriptional activator protein CzcR	1	0	1	0	0	2	2	1	1	1	0	2	1	0	1	1	1	1	1	1	0	0	0	1	3	3	1	2	2	1	1	1	2	2	2
BAC0475	dmeR	Uncharacterized protein	0	0	0	0	0	0	0	0	0	0	0	1	0	0	0	0	0	0	0	0	0	0	0	0	0	0	0	0	0	0	0	0	1	1	0
BAC0133	dnaK	Chaperone protein DnaK	1	1	1	2	1	3	2	2	2	2	2	1	2	2	1	1	2	2	3	3	1	2	1	2	2	2	2	1	1	1	2	2	2	1	1
BAC0135	dpsA	DpsA	1	1	1	1	1	1	1	1	1	1	1	1	1	2	1	1	1	1	1	1	1	1	1	1	1	1	1	1	1	2	2	2	1	1	1
BAC0136	dsbA	Thiol:disulfide interchange protein DsbA	1	1	1	1	1	1	1	1	1	1	1	1	1	1	1	1	1	1	1	1	1	1	1	1	1	1	1	1	1	1	1	1	1	1	1
BAC0137	dsbB	Disulfide bond formation protein B	1	1	1	1	1	1	1	1	1	1	1	1	1	1	1	1	1	1	1	1	1	1	1	1	1	1	1	1	1	1	1	1	1	1	1
BAC0138	dsbC	Thiol:disulfide interchange protein DsbC	1	1	1	1	1	1	1	2	2	1	1	1	1	1	1	1	1	1	1	1	2	1	1	1	1	1	1	1	1	1	1	1	1	1	1
BAC0160	fbpA	Iron-utilization periplasmic protein	1	1	1	1	1	1	1	1	1	1	1	1	1	1	1	1	1	1	1	1	1	1	1	1	1	1	1	1	1	1	1	1	1	1	1
BAC0161	fbpB	Fe(3+)-transport system permease protein FbpB 2	1	1	1	1	1	1	1	1	1	1	1	1	1	1	1	1	1	1	1	1	1	1	1	1	1	1	1	1	1	1	1	1	1	1	1
BAC0162	fbpC	Fe(3+) ions import ATP-binding protein FbpC 2	2	1	0	1	1	2	1	1	1	1	1	2	1	1	1	2	3	1	2	3	2	2	1	1	2	2	1	1	2	2	1	1	2	2	1
BAC0163	fecD	Fe(3+) dicitrate transport system permease protein FecD	1	1	0	1	1	1	1	1	1	1	1	1	1	1	1	1	1	1	1	1	2	2	1	1	1	1	1	1	1	1	1	1	1	1	1
BAC0164	fecE	Fe(3+) dicitrate transport ATP-binding protein FecE	2	2	0	1	3	2	2	1	1	1	1	1	2	2	2	2	2	1	3	4	2	4	3	2	2	2	4	2	1	2	2	3	1	1	1
BAC0165	fetA/ybbL	Uncharacterized ABC transporter ATP-binding protein YbbL	1	0	0	0	0	0	0	0	0	0	0	0	0	1	0	0	0	0	1	1	0	2	0	2	0	0	0	0	0	0	0	0	0	0	0
BAC0166	fetB/ybbM	UPF0014 inner membrane protein YbbM	1	1	0	0	1	0	1	0	0	1	0	1	1	1	1	1	1	0	1	1	1	1	1	1	1	1	1	0	1	0	0	0	1	1	1
BAC0167	fieF/yiip	Ferrous-iron efflux pump FieF	0	0	0	0	0	0	0	0	0	0	0	0	0	0	0	0	0	0	0	0	0	1	0	1	0	0	0	0	0	0	0	0	0	0	0
BAC0168	fptA	Fe(3+)-pyochelin receptor	0	0	0	1	1	0	1	1	1	1	1	1	1	1	1	1	1	1	1	1	1	1	1	1	0	0	1	1	1	0	1	1	1	1	0
BAC0169	fpvA	Ferripyoverdine receptor	1	1	1	0	0	1	1	0	0	0	0	0	0	0	0	0	0	0	1	1	0	1	0	0	1	1	0	1	0	1	0	0	0	0	1
BAC0170	frnE	FrnE protein	1	1	1	1	1	0	1	1	1	1	1	1	1	1	1	1	1	1	1	1	1	2	1	1	1	1	1	1	1	1	1	1	1	1	1
BAC0171	furA	Transcriptional regulator FurA	1	1	1	1	1	1	1	1	1	1	1	1	1	1	1	1	1	1	1	1	1	1	1	1	1	1	1	1	1	1	1	1	1	1	1
BAC0490	G2alt	7-cyano-7-deazaguanine synthase	1	1	1	1	1	1	1	1	1	1	1	1	1	1	1	1	0	1	1	1	1	1	1	1	1	1	1	1	1	1	1	1	1	1	1
BAC0181	glpF	Glycerol uptake facilitator protein	0	0	0	0	0	1	0	1	1	0	1	0	0	0	0	0	0	0	0	0	0	0	0	0	0	0	0	0	0	0	0	0	0	0	0
BAC0183	golT	Putative cation transport ATPase	1	1	0	0	0	0	0	0	0	0	1	0	1	1	0	0	0	1	3	3	1	1	1	1	0	0	1	0	0	1	1	1	0	0	0
BAC0190	hmrR	HTH-type transcriptional regulator HmrR	1	1	0	0	0	0	0	0	0	0	1	0	1	1	0	0	0	1	1	1	1	1	1	1	0	0	1	0	0	1	1	1	0	0	0
BAC0569	hmrR	HTH-type transcriptional regulator HmrR	0	0	0	0	0	1	0	1	1	0	0	0	0	0	0	0	0	0	0	0	0	0	0	0	0	0	0	0	0	0	0	0	0	0	0
BAC0617	hpcopA	Copper-transporting ATPase	0	0	0	0	0	0	0	0	0	0	0	0	0	0	0	0	0	0	0	1	0	0	0	0	0	0	0	0	0	0	0	0	0	0	0
BAC0483	hupE	Protein HupE	0	1	0	1	1	0	1	0	0	1	1	1	1	1	1	1	1	1	1	1	1	1	1	1	1	1	1	0	0	0	1	1	1	1	1
BAC0198	irlS	Sensor protein IrlS	0	0	0	1	0	0	0	0	0	0	0	0	0	1	0	0	0	1	0	2	0	2	0	2	0	0	1	0	0	0	0	1	0	0	1
BAC0199	klaB/telA/kilB	Protein KlaB	0	0	0	0	0	0	0	0	0	0	0	0	0	0	0	0	0	0	0	0	0	0	0	0	0	0	0	0	0	0	0	0	0	0	1
BAC0209	mdrL/yfmO	Multidrug efflux protein yfmO	1	1	1	1	1	1	1	1	1	1	1	1	1	1	1	1	1	1	1	1	1	1	1	1	1	1	1	1	1	1	1	1	1	1	1
BAC0645	mdtA	Multidrug resistance protein MdtA	0	0	0	0	0	0	0	0	0	0	0	0	0	0	0	0	0	0	0	0	0	0	0	1	0	0	0	0	0	0	1	1	0	0	0
BAC0646	mdtB	Multidrug resistance protein MdtB	1	0	1	1	1	0	0	1	1	1	0	0	1	1	1	1	1	1	1	1	0	1	1	1	1	1	1	0	1	1	0	0	0	0	1
BAC0647	mdtC	Multidrug resistance protein MdtC	0	1	0	0	0	1	1	0	0	0	1	1	0	0	0	0	0	0	0	1	0	1	0	0	0	0	0	1	0	0	1	1	1	1	0
BAC0224	merA	Mercuric reductase	0	1	0	1	0	0	0	0	0	0	0	0	0	0	0	1	1	0	0	2	2	0	0	0	0	0	0	0	0	0	0	1	0	0	0
BAC0648	merA	Mercuric reductase (Fragments)	0	1	0	0	0	0	0	0	0	0	0	0	0	0	0	0	0	0	0	0	0	0	0	0	1	2	0	0	0	0	0	0	0	0	0
BAC0649	merA	MerA	0	0	0	0	0	0	0	0	0	0	0	0	0	0	0	0	0	0	0	1	0	0	0	0	0	0	0	0	0	0	0	0	0	0	0
BAC0651	merA	Mercuric reductase	1	0	1	0	1	1	0	1	1	1	1	1	0	1	0	0	0	1	1	2	1	1	1	1	1	0	1	1	1	1	0	0	1	1	1
BAC0653	merA	Mercuric ion reductase	0	0	0	0	0	0	1	0	0	0	0	0	1	0	1	0	0	0	0	0	0	0	0	0	0	1	0	0	0	0	1	0	0	0	0
BAC0657	merB	Alkylmercury lyase	0	0	0	0	0	1	0	0	0	0	0	0	0	0	0	0	0	0	0	0	0	0	0	0	0	0	0	0	0	0	0	0	0	0	0
BAC0226	merC	Mercuric resistance protein MerC	0	0	0	0	0	0	1	0	0	0	0	0	1	0	1	0	0	0	0	0	0	0	0	0	0	0	0	0	0	0	1	0	0	0	0
BAC0229	merG	Mercuric resistance protein	3	1	1	1	1	1	1	1	1	1	2	2	1	1	1	1	1	1	2	1	2	2	2	1	1	1	1	1	1	1	3	3	2	2	5
BAC0231	merP	Mercuric transport protein periplasmic component	0	0	1	1	1	1	0	0	0	0	1	0	0	0	0	0	0	1	0	0	1	1	0	0	0	0	0	0	0	0	0	1	0	0	1
BAC0674	merP	Periplasmic mercuric ion binding protein	1	1	0	0	0	0	0	1	1	1	0	1	0	1	0	1	1	0	1	2	0	0	1	1	1	0	1	0	1	1	0	0	1	1	0
BAC0675	merP	Mercuric transport protein periplasmic component	0	0	0	0	0	0	1	0	0	0	0	0	1	0	1	0	0	0	0	0	0	0	0	0	0	1	0	0	0	0	2	1	0	0	0
BAC0677	merP	MerP	0	0	0	0	0	0	0	0	0	0	1	0	0	0	0	0	0	0	0	0	0	0	0	0	0	0	0	0	0	0	0	0	0	0	0
BAC0678	merP	MerP	0	0	0	0	0	0	0	0	0	0	0	0	0	0	0	0	0	0	0	0	0	0	0	0	0	0	0	0	0	0	1	0	0	0	0
BAC0679	merP	Mercury transport protein	0	0	0	0	0	0	0	0	0	0	0	0	0	0	0	0	0	0	0	0	0	0	0	0	0	0	0	1	0	0	0	0	0	0	0
BAC0680	merR	Mercuric resistance operon regulatory protein	0	0	0	0	0	0	0	0	0	0	0	0	1	0	0	0	0	0	0	0	0	0	0	0	0	0	0	0	0	0	0	0	0	0	0
BAC0685	merR	MerR	0	0	0	0	0	0	0	1	1	0	0	0	0	0	0	0	0	0	0	0	0	0	0	0	0	0	0	0	0	0	0	0	0	0	0
BAC0686	merR	Mercuric resistance operon regulatory protein	0	0	0	0	0	0	0	0	0	0	0	0	0	0	0	0	0	0	0	0	0	0	0	0	1	1	1	0	0	1	0	0	0	0	0
BAC0687	merR	MerR	0	0	0	0	0	0	0	0	0	0	0	0	0	0	0	0	0	0	0	1	0	0	1	0	0	0	0	0	1	0	0	0	0	0	0
BAC0689	merR	Mer operon regulatory protein	0	0	0	0	0	0	0	0	0	0	0	0	0	0	0	0	0	0	0	0	0	0	0	0	0	0	0	0	0	0	0	0	0	0	1
BAC0682	merR1	Mercuric resistance operon regulatory protein	0	0	1	1	1	0	0	0	0	0	0	0	0	0	0	1	1	0	0	0	0	0	0	0	0	0	0	0	0	0	0	0	0	0	0
BAC0683	merR1	Mercuric resistance operon regulatory protein	1	0	0	0	0	0	0	0	0	0	0	0	0	0	0	0	0	1	0	0	0	0	0	0	0	0	0	0	0	0	0	1	0	0	0
BAC0684	merR2	MerR2	0	1	0	0	0	0	0	0	0	0	0	0	0	0	0	0	0	0	0	0	0	0	0	0	0	0	0	0	0	0	0	0	0	0	0
BAC0688	merR2	Organomercurial resistance regulatory protein	0	0	0	0	0	0	1	0	0	0	0	0	1	0	1	0	0	0	0	0	0	0	0	0	0	1	0	0	0	0	1	0	0	0	0
BAC0693	merT	Mercuric transport protein	0	0	0	0	0	0	1	0	0	0	0	0	1	0	1	0	0	0	0	0	0	0	0	0	0	0	0	0	0	0	1	0	0	0	0
BAC0251	mntH/yfeP	Divalent metal cation transporter MntH	1	0	1	0	0	0	0	0	0	0	0	1	0	0	1	0	0	0	0	0	0	0	0	1	1	1	1	1	0	0	1	1	1	1	0
BAC0252	mntP/yebN	Probable manganese efflux pump MntP	1	1	1	1	1	1	1	1	1	1	1	1	1	1	1	1	1	1	2	1	1	1	1	1	1	1	1	1	1	1	1	1	1	1	1
BAC0598	modA	Molybdenum ABC transporter, periplasmic molybdenum-binding protein	1	1	1	1	1	1	0	1	1	0	1	1	0	0	0	1	1	0	0	0	0	1	1	1	1	1	1	1	0	1	1	1	1	1	1
BAC0609	modA	Molybdate-binding periplasmic protein	0	0	0	0	0	0	1	0	0	1	0	0	1	1	1	0	0	1	1	1	1	0	0	0	0	0	0	0	0	0	0	0	0	0	0
BAC0599	modB	Molybdenum ABC transporter, permease protein	1	1	1	1	1	1	1	1	1	1	1	1	1	1	1	1	1	1	1	1	0	1	1	1	1	1	1	1	1	1	1	1	1	1	1
BAC0610	modB	Molybdenum transport system permease protein ModB	1	1	1	1	1	1	1	1	1	0	1	1	1	1	1	1	1	1	1	1	1	1	1	1	1	1	1	1	1	1	0	0	1	1	1
BAC0600	modC	Molybdenum ABC transporter, ATP-binding protein	1	0	0	1	0	0	0	2	1	0	0	0	0	0	1	2	1	2	1	0	0	2	0	1	1	1	1	0	0	0	2	3	0	0	0
BAC0611	modC	Molybdenum import ATP-binding protein ModC	0	0	0	0	0	0	0	0	0	0	0	0	0	0	0	0	0	0	0	0	0	0	0	0	0	0	0	1	0	0	0	0	0	0	0
BAC0550	nccB	Nickel-cobalt-cadmium resistance protein NccB	0	0	0	0	0	0	0	0	0	1	0	0	1	0	1	1	1	0	0	0	0	0	0	0	0	0	0	0	0	0	0	0	0	0	0
BAC0554	nccN	Nickel-cobalt-cadmium resistance protein NccN	0	0	0	0	0	0	0	0	0	0	0	1	1	0	0	0	0	0	0	0	0	0	0	0	1	0	0	0	0	0	1	1	1	1	0
BAC0698	ncrA	NcrA	0	0	1	1	0	1	0	0	0	0	0	0	0	0	0	0	0	1	0	0	0	0	0	0	0	1	0	0	0	0	0	0	0	0	0
BAC0699	ncrB	NcrB	0	0	1	0	0	0	0	0	0	0	0	0	0	0	0	0	0	0	0	0	0	0	0	0	0	1	0	0	0	0	0	0	0	0	0
BAC0540	nfsA	Oxygen-insensitive NADPH nitroreductase	0	0	0	0	0	1	0	1	1	0	1	0	0	0	0	0	0	0	0	0	0	0	0	0	0	0	0	1	0	0	0	0	0	0	0
BAC0270	nikA	Nickel-binding periplasmic protein	1	1	0	1	1	1	1	1	1	1	1	1	1	1	1	1	1	1	1	1	1	1	1	1	1	1	1	1	0	0	1	1	1	1	1
BAC0271	nikB	Nickel transport system permease protein NikB	1	1	1	1	1	1	1	1	1	1	1	1	1	1	1	1	1	1	2	1	1	1	1	1	1	1	1	1	1	1	1	1	1	1	1
BAC0272	nikC	Nickel transport system permease protein NikC	1	1	1	1	1	2	1	1	1	1	1	1	1	1	1	1	1	1	1	1	1	2	1	1	1	1	1	1	1	1	1	1	1	1	1
BAC0273	nikD	Nickel import ATP-binding protein NikD	1	1	1	1	1	3	1	2	1	1	2	2	1	1	1	1	2	1	3	2	3	1	2	2	1	2	2	2	2	2	1	1	2	2	2
BAC0274	nikE	Nickel import ATP-binding protein NikE	1	0	0	1	1	3	1	1	2	1	2	1	1	1	3	2	2	1	2	1	2	1	1	2	1	1	1	1	0	0	0	0	1	1	0
BAC0275	nikR	Nickel-responsive regulator	0	0	0	0	0	1	0	1	1	0	0	0	0	0	0	0	0	0	0	0	0	0	0	0	0	0	0	0	0	0	0	0	0	0	0
BAC0277	nirB	NirB	0	0	0	1	0	1	0	0	0	0	0	0	0	0	0	0	0	1	0	0	0	0	0	0	0	0	0	0	0	0	0	0	0	0	0
BAC0281	nmtR	HTH-type transcriptional regulator NmtR	0	0	0	0	0	0	0	0	0	0	1	0	0	0	0	0	0	0	0	0	0	0	0	0	0	0	0	1	0	0	0	0	0	0	0
BAC0287	nrsD/nreB	Nickel resistance protein	1	1	0	0	1	0	1	1	1	1	1	1	1	1	1	0	0	0	1	1	0	0	1	1	0	0	1	0	1	1	1	1	1	1	1
BAC0288	nrsR	OmpR subfamily protein NrsR/RppA/Rre33	2	1	0	0	2	0	0	0	0	1	0	0	0	2	0	2	2	1	0	2	0	1	2	2	1	0	0	0	2	2	0	0	0	0	1
BAC0289	nrsS	Sensory transduction histidine kinase NrsS/RppB/Hik30	1	1	1	1	1	1	1	1	1	1	1	1	1	1	1	1	1	1	1	1	1	1	1	1	1	1	1	1	1	0	1	1	1	1	1
BAC0298	pbrA	P-type ATPase involved in Pb(II) resistance PbrA	0	0	0	0	0	0	0	0	0	0	1	0	0	0	1	0	0	0	0	1	0	0	0	0	0	0	0	0	0	0	2	2	0	0	0
BAC0299	pbrB/pbrC	Lipoprotein signal peptidase	2	1	1	2	1	1	3	1	1	1	2	1	2	1	1	2	1	2	1	1	1	2	2	3	1	1	1	3	1	2	2	1	1	1	1
BAC0302	pbrT	Lead uptake protein PbrT	1	1	1	1	0	0	1	0	0	1	1	1	1	1	1	1	1	1	0	1	1	0	1	1	1	1	1	1	1	0	1	1	1	1	0
BAC0303	pcoA	Copper resistance protein A	1	1	1	1	0	0	2	0	0	2	0	1	2	1	1	1	2	1	2	1	1	0	1	2	2	1	1	1	1	0	2	2	1	1	0
BAC0308	pcoR	Transcriptional regulatory protein PcoR	0	0	0	0	0	1	0	0	0	0	0	1	0	0	0	0	0	0	0	1	0	0	0	1	0	0	2	1	0	0	0	0	1	1	0
BAC0612	perO	Divalent ion symporter	1	1	1	1	1	1	1	1	1	1	1	1	1	1	1	1	1	1	0	1	1	1	1	1	1	1	1	1	1	1	1	1	1	1	1
BAC0497	pfr	Ferritin	0	0	0	0	0	0	0	1	1	0	1	0	0	0	0	0	0	0	0	0	0	0	0	0	0	0	0	1	0	0	0	0	0	0	0
BAC0312	pitA	Low-affinity inorganic phosphate transporter 1	1	1	1	1	1	1	1	1	1	1	1	1	1	1	1	1	1	1	1	1	1	1	1	1	1	1	1	1	1	1	1	1	1	1	1
BAC0487	pmrA	Transcriptional regulatory protein PmrA	2	1	1	0	0	0	2	1	1	1	1	2	1	1	0	0	0	1	0	1	0	0	0	0	2	1	0	1	0	0	1	1	2	2	2
BAC0488	pmrB	Sensor histidine kinase PmrB	1	0	1	0	0	0	1	1	1	1	0	1	1	1	0	0	0	1	0	1	0	0	0	0	1	0	0	1	0	0	1	1	1	1	1
BAC0485	pmrC	Putative cytoplasmic membrane protein pmrC	1	0	1	1	1	0	2	1	1	1	1	2	1	1	1	0	0	1	1	1	1	1	1	1	1	1	1	1	0	1	1	1	2	2	1
BAC0315	pstA	Phosphate transport system permease protein PstA	1	1	1	1	1	1	1	1	1	1	1	1	1	1	1	1	1	1	1	1	1	1	1	1	1	1	1	1	1	1	1	1	1	1	1
BAC0316	pstB	Phosphate import ATP-binding protein PstB	1	1	1	1	1	1	1	1	1	1	1	1	1	1	1	1	2	1	2	3	1	1	1	1	1	1	1	1	1	1	1	1	1	1	1
BAC0317	pstC	Phosphate transport system permease protein PstC	1	1	1	1	1	1	1	1	0	1	1	1	1	1	1	1	1	1	2	1	2	2	1	1	1	1	1	1	1	1	1	1	1	1	1
BAC0318	pstS	Phosphate-binding protein PstS	1	1	1	1	1	1	1	1	1	1	1	1	1	1	1	1	1	1	1	2	1	1	1	1	1	1	1	1	1	1	1	1	1	1	1
BAC0332	rcnR/yohL	Transcriptional repressor RcnR	0	0	0	1	0	0	0	0	0	0	1	0	0	0	0	0	0	1	0	0	0	0	0	0	0	0	0	0	0	1	0	0	0	0	0
BAC0356	recG	ATP-dependent DNA helicase RecG	1	1	1	1	1	1	1	1	1	1	1	1	1	1	1	1	1	1	1	2	1	2	1	1	1	1	1	1	1	1	1	1	1	1	1
BAC0357	recG	ATP-dependent DNA helicase (Fragment)	1	1	1	1	1	1	1	1	1	1	1	1	1	1	1	1	1	1	1	1	1	0	1	1	1	1	1	1	1	1	1	1	1	1	1
BAC0334	robA	Right origin-binding protein	0	0	0	0	0	0	0	0	0	0	0	0	0	1	0	0	0	1	0	0	0	0	0	1	1	0	0	0	0	0	0	0	0	0	1
BAC0293	ruvB	Malic enzyme family protein (Fragment)	1	1	1	1	1	1	1	1	1	1	1	1	1	1	1	1	1	1	1	1	1	2	1	1	1	1	1	1	1	1	1	1	1	1	1
BAC0355	ruvB	Holliday junction ATP-dependent DNA helicase RuvB	1	1	1	1	1	1	1	1	1	1	1	1	1	1	1	1	1	1	1	1	1	1	1	1	1	1	1	1	1	1	1	1	1	1	1
BAC0342	silB	Putative membrane fusion protein SilB	0	0	0	0	0	0	0	0	0	0	0	0	0	0	0	0	0	0	0	0	0	0	0	0	0	1	0	0	0	0	0	0	0	0	0
BAC0346	silP	Silver exporting P-type ATPase	1	0	1	1	0	0	0	0	0	2	1	1	1	0	1	1	1	1	2	1	1	0	1	1	2	1	0	1	0	0	2	2	1	1	0
BAC0347	silR	Probable transcriptional regulatory protein SilR	0	0	0	0	0	0	0	0	0	0	0	0	0	0	0	0	0	0	1	0	0	0	0	0	0	0	0	1	0	0	0	0	0	0	0
BAC0348	silS	Probable sensor kinase SilS	0	0	0	0	0	0	0	0	0	0	0	0	0	0	0	0	0	0	0	0	0	1	0	0	0	0	0	1	0	0	1	1	0	0	0
BAC0350	sitB	SitB	0	0	0	0	0	0	0	0	0	0	0	0	0	0	0	0	0	0	0	1	0	0	0	0	0	0	1	1	0	0	0	0	1	0	0
BAC0365	smtA	Metallothionein	0	0	0	0	0	0	0	0	0	0	0	0	0	0	0	0	0	0	0	1	0	0	0	0	0	0	0	0	0	0	0	0	0	0	0
BAC0707	sodB	Superoxide dismutase [Fe]	1	1	1	1	1	1	1	1	1	1	1	1	1	1	1	1	1	1	1	1	1	1	1	1	1	1	1	1	1	1	1	1	1	1	1
BAC0371	soxS	Regulatory protein SoxS	1	1	0	1	1	1	1	0	0	1	1	1	1	1	1	1	1	1	1	1	1	1	2	1	1	1	1	1	1	1	1	1	1	1	1
BAC0385	tehB	Tellurite methyltransferase	0	0	0	1	0	1	0	1	1	0	0	0	0	1	0	1	1	0	1	0	0	0	0	0	1	1	0	0	0	1	1	1	0	0	1
BAC0386	terA	Tellurium resistance protein TerA	1	1	1	1	1	0	1	0	0	1	1	1	1	1	1	1	0	1	2	2	1	2	1	1	1	1	2	1	1	1	2	2	1	1	2
BAC0388	terC	Tellurium resistance protein TerC	1	1	0	1	1	0	0	0	0	0	1	0	0	0	0	0	0	0	0	0	0	0	0	0	0	0	0	0	0	0	0	0	0	0	0
BAC0389	terD	Tellurium resistance protein TerD	2	2	2	2	1	0	2	0	0	2	2	2	2	2	2	2	1	2	2	3	2	2	2	2	3	2	2	2	2	2	2	2	2	2	2
BAC0390	terE	Tellurium resistance protein TerE	0	0	0	0	1	0	0	0	0	0	0	0	0	0	0	0	0	0	0	1	0	1	0	0	0	0	0	0	0	0	0	0	0	0	0
BAC0392	terZ	Tellurium resistance protein TerZ	1	1	1	1	2	1	1	1	1	1	2	1	1	1	1	1	0	1	1	1	1	1	1	1	1	1	1	1	1	1	1	1	1	1	1
BAC0400	troB	Zinc transport system ATP-binding protein TroB	0	1	0	0	0	0	0	0	0	0	0	1	0	0	0	0	0	0	0	0	0	0	0	0	0	0	1	0	0	1	0	0	0	1	0
BAC0601	tunR	Molybdenum-pterin binding domain protein/site-specific recombinase, phage integrase family	1	1	1	1	1	1	1	1	1	1	1	1	1	1	1	1	1	1	1	1	0	1	1	1	1	1	1	1	1	1	1	1	1	1	1
BAC0607	tupC	ATPase component of tungstate ABC transporter	0	1	0	0	1	1	0	0	0	0	0	0	0	0	0	0	0	0	0	1	0	1	0	0	0	0	0	0	0	0	1	1	0	0	1
BAC0604	wtpC	Molybdate/tungstate import ATP-binding protein WtpC	1	3	1	1	3	2	3	2	2	4	2	1	3	2	4	1	1	1	4	3	4	3	4	3	2	3	2	2	2	1	2	2	1	1	2
BAC0432	ybtP	Lipoprotein inner membrane ABC-transporter	1	0	0	0	0	1	0	0	1	0	2	0	0	0	0	0	0	0	0	2	0	0	0	0	1	0	0	0	1	1	2	2	0	0	1
BAC0433	ybtQ	Inner membrane ABC-transporter YbtQ	2	3	2	1	1	0	1	2	2	2	0	2	1	2	1	2	2	1	2	4	2	3	1	2	2	1	2	1	1	2	1	1	2	2	1
BAC0440	yfeB	Chelated iron transport system membrane protein YfeB	0	2	2	0	2	0	1	1	1	0	0	1	0	2	0	1	1	0	1	2	0	1	1	2	1	1	0	1	1	0	1	1	2	1	1
BAC0443	yfmO	Multidrug efflux protein YfmO	1	0	0	0	0	0	1	0	0	0	0	0	1	1	1	0	0	0	1	1	1	1	0	1	0	0	0	0	0	0	0	0	0	0	1
BAC0444	yfmP	HTH-type transcriptional regulator YfmP	0	0	0	0	0	0	0	0	0	0	0	0	0	0	0	0	0	0	0	0	0	0	0	1	0	0	0	0	0	0	0	0	1	1	0
BAC0541	yieF	Uncharacterized protein YieF	0	1	0	0	0	0	0	0	0	0	0	0	0	1	1	1	0	0	0	0	0	0	0	0	0	0	0	0	0	0	0	0	0	0	0
BAC0447	yjaA	Uncharacterized protein YjaA	0	1	0	0	1	0	0	0	0	0	0	1	0	0	0	0	0	0	0	0	0	0	0	0	1	1	1	0	0	1	0	0	1	1	0
BAC0452	yqjH	NADPH-dependent ferric-chelate reductase	1	1	1	1	1	1	1	0	0	1	1	1	1	1	1	1	1	1	1	1	1	1	1	1	1	1	1	1	1	1	1	1	1	1	1
BAC0456	ziaR	Transcriptional repressor SmtB homolog	1	1	1	1	1	1	0	0	0	0	0	1	0	0	1	1	1	1	1	1	1	1	1	1	1	1	1	0	0	1	1	1	1	1	1
BAC0458	zipB	Putative membrane protein	1	0	0	0	0	1	1	1	0	1	1	0	1	0	1	1	1	0	0	0	0	0	0	0	0	0	0	0	0	1	1	1	0	0	0
BAC0459	zitB/ybgR	Zinc transporter ZitB	0	0	0	0	0	0	0	0	0	0	0	0	0	0	0	0	0	0	0	1	0	1	0	0	0	0	0	0	0	0	0	0	0	0	0
BAC0460	zneB/hmxB	Membrane fusion protein (MFP-RND) heavy metal cation tricomponent efflux HmxB (CzcB-like)	0	0	0	0	1	0	0	0	0	0	0	0	0	0	0	0	0	0	0	0	1	1	1	0	0	0	0	0	0	0	0	0	0	0	1
BAC0461	zntA/yhhO	Lead, cadmium, zinc and mercury-transporting ATPase	1	0	0	1	0	0	1	0	0	1	1	1	0	0	1	2	2	1	2	0	2	2	2	3	2	2	0	0	1	3	1	0	1	1	0
BAC0463	znuA/yebL	High-affinity zinc uptake system protein ZnuA	1	1	1	1	1	1	1	1	1	1	1	1	1	1	1	1	1	1	0	1	1	1	1	1	1	1	1	1	1	1	1	1	1	1	1
BAC0464	znuB/yebI	High-affinity zinc uptake system membrane protein ZnuB	1	1	1	1	1	1	1	1	1	1	1	1	1	1	1	1	1	1	1	1	1	1	1	1	1	1	1	1	1	1	1	1	1	1	1
BAC0465	znuC/yebM	Zinc import ATP-binding protein ZnuC	1	1	1	1	1	1	1	2	2	1	1	1	1	1	1	1	1	1	1	4	1	1	1	1	1	1	1	1	1	1	1	1	1	1	1
BAC0467	zraR/hydH	Transcriptional regulatory protein ZraR	2	4	0	5	4	1	2	1	1	3	0	2	2	4	2	4	4	5	2	2	1	3	3	3	7	4	4	0	3	3	2	5	2	2	4
BAC0468	zraS/hydG	Sensor protein ZraS	2	1	1	1	1	1	1	1	1	1	1	1	1	0	1	1	1	1	0	1	2	1	1	1	1	0	1	1	1	1	1	1	1	1	1
BAC0470	zur/yjbK	Zinc uptake regulation protein	1	1	1	1	1	1	1	1	1	1	1	1	1	1	1	1	1	1	0	1	1	1	1	1	1	1	1	1	1	1	1	1	1	1	1
* Tellurium resistance genes (ter) are shown by bold font.

## Sheet: Pglacincola_BacMet-count
BacMet ID	Gene	Description	P. glacincola BNF20	Metal Resistance
BAC0003	acn	Aconitate hydratase	2	Iron
BAC0563	acrD	RND family aminoglycoside/multidrug efflux pump	1	Copper, Zinc
BAC0570	actP	Cation/acetate symporter ActP-1	1	Copper, Tellurium
BAC0565	actR	Acid tolerance regulatory protein ActR	2	Cadmium, Zinc
BAC0020	aioA/aoxB	Arsenite oxidase subunit AioA	1	Arsenic
BAC0571	arsA	Arsenical pump-driving ATPase	1	Arsenic, Antimony
BAC0578	arsB	ArsB	1	Arsenic, Antimony
BAC0032	arsC	Protein ArsC	1	Arsenic, Antimony
BAC0583	arsC	Arsenate reductase	1	Arsenic, Antimony
BAC0034	arsH	Arsenic resistance protein ArsH	1	Arsenic
BAC0035	arsM	UbiE/COQ5 methyltransferase	1	Arsenic
BAC0594	arsR	Arsenical resistance operon repressor	1	Arsenic, Antimony, Bismuth
BAC0039	baeR	Transcriptional regulatory protein BaeR	1	Copper, Zinc, Tungsten
BAC0040	baeS	Signal transduction histidine-protein kinase BaeS	1	Copper, Zinc, Tungsten
BAC0048	bfrA	Bacterioferritin	2	Iron
BAC0361	chrI	ChrI, regulatory protein, involved in Chromate resistance	1	Chromium
BAC0538	chrR	Chromate reductase	1	Chromium, Iron
BAC0068	cmeA	CmeA	1	Copper, Cobalt
BAC0076	comR/ycfQ	HTH-type transcriptional repressor ComR	1	Copper
BAC0629	copB	Copper-exporting P-type ATPase B	1	Copper
BAC0631	copC	CopC	1	Copper
BAC0080	copJ	CopJ protein	1	Copper
BAC0083	copR	Transcriptional activator protein CopR	1	Copper
BAC0637	copS	CopS	1	Copper
BAC0086	corA	Magnesium transport protein CorA	1	Magnesium, Cobalt, Nickel, Manganese
BAC0088	corC	Magnesium and cobalt efflux protein CorC	1	Cobalt, Magnesium
BAC0089	corR	Sigma-54 dependent DNA-binding response regulator	1	Cobalt, Magnesium, Copper
BAC0102	cueA	Copper transporter	1	Copper, Silver
BAC0109	cusC/ylcB	Cation efflux system protein CusC	1	Copper, Silver
BAC0111	cusR/ylcA	Transcriptional regulatory protein CusR	1	Copper, Silver
BAC0115	cutE/lnt	Apolipoprotein N-acyltransferase	1	Copper
BAC0122	czcD	Cobalt-zinc-cadmium resistance protein CzcD	1	Cadmiun, Zinc, Cobalt
BAC0133	dnaK	Chaperone protein DnaK	1	Copper
BAC0135	dpsA	DpsA	1	Iron
BAC0136	dsbA	Thiol:disulfide interchange protein DsbA	1	Cadmiun, Zinc, Mercury
BAC0137	dsbB	Disulfide bond formation protein B	1	Cadmium, Mercury
BAC0138	dsbC	Thiol:disulfide interchange protein DsbC	1	Copper
BAC0160	fbpA	Iron-utilization periplasmic protein	1	Iron, Gallium
BAC0161	fbpB	Fe(3+)-transport system permease protein FbpB 2	1	Iron, Gallium
BAC0162	fbpC	Fe(3+) ions import ATP-binding protein FbpC 2	1	Iron, Gallium
BAC0163	fecD	Fe(3+) dicitrate transport system permease protein FecD	1	Nickel, Cobalt
BAC0164	fecE	Fe(3+) dicitrate transport ATP-binding protein FecE	3	Nickel, Cobalt
BAC0166	fetB/ybbM	UPF0014 inner membrane protein YbbM	1	Iron
BAC0168	fptA	Fe(3+)-pyochelin receptor	1	Iron, Cobalt, Nickel, Gallium
BAC0170	frnE	FrnE protein	1	Cadmium
BAC0171	furA	Transcriptional regulator FurA	1	Iron
BAC0490	G2alt	7-cyano-7-deazaguanine synthase	1	Aluminium
BAC0483	hupE	Protein HupE	1	Nickel
BAC0209	mdrL/yfmO	Multidrug efflux protein yfmO	1	Zinc, Cobalt, Chromium
BAC0646	mdtB	Multidrug resistance protein MdtB	1	Zinc
BAC0651	merA	Mercuric reductase	1	Mercury
BAC0229	merG	Mercuric resistance protein	1	Mercury
BAC0231	merP	Mercuric transport protein periplasmic component	1	Mercury
BAC0682	merR1	Mercuric resistance operon regulatory protein	1	Mercury
BAC0252	mntP/yebN	Probable manganese efflux pump MntP	1	Manganese, Magnesium
BAC0598	modA	Molybdenum ABC transporter, periplasmic molybdenum-binding protein	1	Tungsten, Molybdenum
BAC0599	modB	Molybdenum ABC transporter, permease protein	1	Tungsten, Molybdenum
BAC0610	modB	Molybdenum transport system permease protein ModB	1	Tungsten, Molybdenum
BAC0270	nikA	Nickel-binding periplasmic protein	1	Nickel
BAC0271	nikB	Nickel transport system permease protein NikB	1	Nickel
BAC0272	nikC	Nickel transport system permease protein NikC	1	Nickel
BAC0273	nikD	Nickel import ATP-binding protein NikD	1	Nickel
BAC0274	nikE	Nickel import ATP-binding protein NikE	1	Nickel
BAC0287	nrsD/nreB	Nickel resistance protein	1	Nickel, Cobalt
BAC0288	nrsR	OmpR subfamily protein NrsR/RppA/Rre33	2	Nickel
BAC0289	nrsS	Sensory transduction histidine kinase NrsS/RppB/Hik30	1	Nickel
BAC0299	pbrB/pbrC	Lipoprotein signal peptidase	1	Lead
BAC0612	perO	Divalent ion symporter	1	Tungsten, Molybdenum
BAC0312	pitA	Low-affinity inorganic phosphate transporter 1	1	Tellurium, Zinc
BAC0485	pmrC	Putative cytoplasmic membrane protein pmrC	1	Iron
BAC0315	pstA	Phosphate transport system permease protein PstA	1	Arsenic
BAC0316	pstB	Phosphate import ATP-binding protein PstB	1	Arsenic
BAC0317	pstC	Phosphate transport system permease protein PstC	1	Arsenic
BAC0318	pstS	Phosphate-binding protein PstS	1	Arsenic
BAC0356	recG	ATP-dependent DNA helicase RecG	1	Chromium, Tellurium, Selenium
BAC0357	recG	ATP-dependent DNA helicase (Fragment)	1	Chromium, Tellurium, Selenium
BAC0293	ruvB	Malic enzyme family protein (Fragment)	1	Chromium, Tellurium,Selenium
BAC0355	ruvB	Holliday junction ATP-dependent DNA helicase RuvB	1	Chromium, Tellurium,Selenium
BAC0707	sodB	Superoxide dismutase [Fe]	1	Selenium
BAC0371	soxS	Regulatory protein SoxS	1	Zinc
BAC0386	terA	Tellurium resistance protein TerA	1	Tellurium
BAC0388	terC	Tellurium resistance protein TerC	1	Tellurium
BAC0389	terD	Tellurium resistance protein TerD	1	Tellurium
BAC0390	terE	Tellurium resistance protein TerE	1	Tellurium
BAC0392	terZ	Tellurium resistance protein TerZ	2	Tellurium
BAC0601	tunR	Molybdenum-pterin binding domain protein/site-specific recombinase, phage integrase family	1	Tungsten, Molybdenum
BAC0607	tupC	ATPase component of tungstate ABC transporter	1	Tungsten
BAC0604	wtpC	Molybdate/tungstate import ATP-binding protein WtpC	3	Tungsten, Molybdenum
BAC0433	ybtQ	Inner membrane ABC-transporter YbtQ	1	Iron
BAC0440	yfeB	Chelated iron transport system membrane protein YfeB	2	Iron, Manganese
BAC0447	yjaA	Uncharacterized protein YjaA	1	Cadmium
BAC0452	yqjH	NADPH-dependent ferric-chelate reductase	1	Iron
BAC0456	ziaR	Transcriptional repressor SmtB homolog	1	Zinc
BAC0460	zneB/hmxB	Membrane fusion protein (MFP-RND) heavy metal cation tricomponent efflux HmxB (CzcB-like)	1	Zinc
BAC0463	znuA/yebL	High-affinity zinc uptake system protein ZnuA	1	Zinc
BAC0464	znuB/yebI	High-affinity zinc uptake system membrane protein ZnuB	1	Zinc
BAC0465	znuC/yebM	Zinc import ATP-binding protein ZnuC	1	Zinc
BAC0467	zraR/hydH	Transcriptional regulatory protein ZraR	4	Zinc
BAC0468	zraS/hydG	Sensor protein ZraS	1	Zinc, Lead
BAC0470	zur/yjbK	Zinc uptake regulation protein	1	Zinc
* Detailed table of metal resistance genes encoded in P. glacincola BNF20 genome. Tellurium resistance genes (ter) are shown by bold font.
