# Supplementary material for: Comparative genomic analysis of a new tellurite-resistant Psychrobacter strain isolated from the Antarctic Peninsula
Source: PeerJ. 2018 Feb 19;6:e4402. doi: 10.7717/peerj.4402 (PMC5822837; doi:10.7717/peerj.4402)
Supplement: Table S4 [file peerj-06-4402-s004.xlsx]

## Sheet: % Data
	Table S4. Per cent of bacterial genomes exhibiting ter genes.
	Number of ter genes	Phylum	Class	Order	Family	Genus
	1	0.692182	0.703333	0.690654	0.687012	0.679539
	2	0.0278346	0.0313333	0.0258885	0.0256999	0.0230548
	3	0.01228	0.0153333	0.0100921	0.00963745	0.00691643
	4	0.0671306	0.0893333	0.0658183	0.0633318	0.0524496
	5	0.145722	0.0946667	0.151382	0.156035	0.180403
	6	0.0437986	0.048	0.0443177	0.0458926	0.0461095
	7	0.011052	0.018	0.0118473	0.012391	0.0115274
	* Data show the per cent a of bacterial genomes with 1, 2, 3, 4, 5, 6, and 7 ter genes, classified at different taxonomic levels. Only taxonomic clasifications with at least 3 bacterial genomes encoding at least one ter gene were used (same data as Figure 4).

## Sheet: Phylum
Phylum	Number of prokaryotic genomes which present at least one ter gene	genome1	genome2	genome3	genome4	genome5	genome6	genome7	genome8	genome9	genome10	genome11	genome12	genome13	genome14	genome15	genome16	genome17	genome18	genome19	genome20	genome21	genome22	genome23	genome24	genome25	genome26	genome27	genome28	genome29	genome30	genome31	genome32	genome33	genome34	genome35	genome36	genome37	genome38	genome39	genome40	genome41	genome42	genome43	genome44	genome45	genome46	genome47	genome48
Proteobacteria	867	1	1	5	4	5	1	1	1	1	6	1	1	1	2	1	1	1	1	3	1	4	7	5	6	1	1	1	1	1	1	1	5	1	1	5	7	1	1	1	1	1	6	1	1	1	1	1	1
Actinobacteria	854	2	5	5	6	1	1	1	1	1	1	1	1	1	1	1	1	5	6	5	4	5	1	1	1	1	4	1	5	1	1	5	1	1	1	1	1	1	1	1	1	1	1	1	1	1	1	1	4
Firmicutes	361	1	4	5	6	6	2	5	1	2	1	6	1	1	1	1	1	6	4	1	1	4	4	4	1	1	1	1	1	6	1	4	5	1	1	5	5	1	5	3	1	1	1	6	2	1	5	1	6
Bacteroidetes	229	1	1	2	5	1	1	1	5	1	1	1	1	1	1	1	1	1	5	1	1	1	1	4	1	1	1	2	1	5	1	1	5	1	5	1	1	1	1	1	1	1	1	1	1	1	1	1	1
Cyanobacteria	40	4	3	4	4	4	3	3	4	4	4	4	1	1	4	4	4	3	3	1	4	1	5	4	4	4	1	3	3	2	4	4	4	4	1	1	4	4	4	4	4
Deinococcus-Thermus	20	1	6	6	6	1	1	1	6	1	6	4	1	4	1	1	1	6	4	5	5
Spirochaetes	17	1	1	1	1	1	1	1	1	1	1	1	1	1	1	1	4	1
Acidobacteria	16	1	2	1	1	1	1	1	1	1	1	1	1	1	1	1	1
Chloroflexi	13	1	1	1	1	1	1	1	1	1	1	1	1	1
Euryarchaeota	9	1	1	1	1	1	1	1	1	1
Verrucomicrobia	8	1	1	1	6	1	1	1	1
Aquificae	3	1	1	1
Chlorobi	3	1	1	1
Planctomycetes	3	1	1	1
Chlamydiae	2	1	1
Crenarchaeota	2	1	1
Elusimicrobia	2	1	1
Gemmatimonadetes	2	1	1
Ignavibacteriae	2	1	1
Thaumarchaeota	2	1	1
Deferribacteres	1	1
Fusobacteria	1	3
Lentisphaerae	1	1
Nitrospinae	1	1
Nitrospirae	1	5
Tenericutes	1	1
[truncated: 819 more columns]

## Sheet: Class
Class	Number of prokaryotic genomes which present at least one ter gene	genome1	genome2	genome3	genome4	genome5	genome6	genome7	genome8	genome9	genome10	genome11	genome12	genome13	genome14	genome15	genome16	genome17	genome18	genome19	genome20	genome21	genome22	genome23	genome24	genome25	genome26	genome27	genome28	genome29	genome30	genome31	genome32	genome33	genome34	genome35	genome36	genome37	genome38	genome39	genome40	genome41	genome42	genome43	genome44	genome45	genome46	genome47	genome48
Gammaproteobacteria	379	1	1	4	5	1	1	1	1	6	2	1	1	4	7	6	1	1	1	1	1	1	5	7	1	6	1	6	6	1	4	5	7	1	1	1	1	1	1	1	1	1	1	1	1	1	1	1	1
Alphaproteobacteria	253	1	1	1	3	1	1	1	1	1	1	1	1	1	1	1	1	1	1	5	1	1	1	1	1	1	2	1	1	1	1	1	1	1	1	1	1	2	1	1	3	6	1	1	4	1	1	1	1
Bacilli	247	4	5	6	6	5	1	1	6	1	1	1	6	1	1	1	1	1	6	1	4	5	1	1	5	5	1	3	1	1	1	6	2	1	5	1	6	1	4	6	6	1	6	1	1	1	1	1	5
Betaproteobacteria	179	1	1	1	5	1	5	5	1	1	1	1	1	1	1	1	5	1	1	1	1	5	1	1	4	1	5	1	1	6	1	1	1	5	5	1	5	1	1	1	1	1	4	3	1	1	1	1	1
Flavobacteriia	116	1	2	5	1	1	5	1	1	1	1	1	1	5	1	1	1	2	1	5	1	1	5	1	1	1	1	1	1	1	1	1	1	1	1	4	1	1	1	1	1	5	1	1	1	4	1	1	5
Clostridia	102	2	1	4	1	1	4	4	4	1	4	4	4	4	4	4	1	4	1	4	1	1	6	4	1	4	4	4	4	1	1	4	4	1	4	1	1	1	4	1	1	1	4	2	4	4	4	4	5
Cytophagia	53	1	1	1	1	1	1	5	1	1	1	1	1	1	1	1	1	1	1	4	1	1	1	1	1	1	1	5	1	1	1	3	1	1	1	1	1	1	1	4	1	1	1	1	1	1	1	4	3
Bacteroidia	22	1	4	1	1	1	4	4	1	1	1	1	4	1	5	1	4	1	1	1	1	1	1
Sphingobacteriia	22	1	1	1	5	1	1	1	1	5	1	1	5	1	1	5	1	5	1	5	1	1	1
Deinococci	20	1	6	6	6	1	1	1	6	1	6	4	1	4	1	1	1	6	4	5	5
Spirochaetia	17	1	1	1	1	1	1	1	1	1	1	1	1	1	1	1	4	1
Oscillatoriophycideae	13	4	4	4	4	5	4	4	4	4	4	1	4	4
Chitinophagia	11	1	1	1	1	1	1	1	1	3	1	1
Negativicutes	11	1	2	1	5	4	1	1	4	1	1	4
Acidobacteriia	10	1	1	1	1	1	1	1	1	1	1
Thermoleophilia	8	1	1	1	1	1	1	1	1
Chloroflexia	5	1	1	1	1	1
Dehalococcoidia	5	1	1	1	1	1
Halobacteria	4	1	1	1	1
Saprospiria	4	1	1	1	1
Thermoplasmata	4	1	1	1	1
Aquificae	3	1	1	1
Chlorobia	3	1	1	1
Methylacidiphilae	3	1	1	1
Planctomycetia	3	1	1	1
Rubrobacteria	3	1	1	1
Acidimicrobiia	2	1	1
Blastocatellia	2	1	1
Chlamydiia	2	1	1
Gemmatimonadetes	2	1	1
Gloeobacteria	2	1	1
Holophagae	2	2	1
Ignavibacteria	2	1	1
Opitutae	2	1	1
Thermomicrobia	2	1	1
Thermoprotei	2	1	1
Verrucomicrobiae	2	6	1
Acidithiobacillia	1	1
Deferribacteres	1	1
Elusimicrobia	1	1
Endomicrobia	1	1
Fusobacteriia	1	3
Ktedonobacteria	1	1
Lentisphaeria	1	1
Methanomicrobia	1	1
Mollicutes	1	1
Nitrospinia	1	1
Nitrospira	1	5
Spartobacteria	1	1
Tissierellia	1	2
[truncated: 331 more columns]

## Sheet: Order
Order	Number of prokaryotic genomes which present at least one ter gene	genome1	genome2	genome3	genome4	genome5	genome6	genome7	genome8	genome9	genome10	genome11	genome12	genome13	genome14	genome15	genome16	genome17	genome18	genome19	genome20	genome21	genome22	genome23	genome24	genome25	genome26	genome27	genome28	genome29	genome30	genome31	genome32	genome33	genome34	genome35	genome36	genome37	genome38	genome39	genome40	genome41	genome42	genome43	genome44	genome45	genome46	genome47	genome48
Micrococcales	225	2	1	1	1	1	1	1	1	1	1	1	1	1	1	1	1	1	1	1	1	1	1	1	1	1	1	1	1	1	1	1	1	1	1	1	1	1	5	1	1	1	1	5	1	5	1	1	1
Corynebacteriales	201	6	1	1	5	6	4	1	4	5	1	5	1	1	1	2	1	5	1	5	1	1	1	1	1	1	1	1	1	1	1	1	1	1	1	1	5	5	1	5	2	1	1	5	5	5	1	1	5
Streptomycetales	149	5	5	5	5	5	5	6	5	5	5	5	5	5	5	5	5	5	5	6	5	5	5	5	5	5	5	5	5	6	5	5	5	5	5	5	5	5	5	5	5	5	6	5	5	5	6	5	5
Bacillales	148	4	5	6	6	5	6	1	1	6	1	6	1	4	5	1	1	5	5	1	3	1	6	2	5	1	6	1	4	6	6	6	1	1	5	5	1	1	6	5	5	1	1	4	1	1	5	1	5
Flavobacteriales	116	1	2	5	1	1	5	1	1	1	1	1	1	5	1	1	1	2	1	5	1	1	5	1	1	1	1	1	1	1	1	1	1	1	1	4	1	1	1	1	1	5	1	1	1	4	1	1	5
Rhizobiales	111	1	1	1	3	1	1	1	1	1	1	1	1	1	1	1	1	6	1	1	1	1	1	1	2	1	1	1	1	1	1	1	1	3	1	1	1	1	1	1	1	1	1	1	1	1	1	1	1
Burkholderiales	104	1	5	1	5	1	1	5	1	1	4	5	6	1	1	4	3	1	1	1	1	6	1	1	5	1	1	5	1	1	1	1	2	1	1	1	4	1	1	1	4	1	1	1	4	1	1	5	5
Clostridiales	101	2	1	4	1	1	4	4	4	1	4	4	4	4	4	4	1	4	1	4	1	1	6	4	1	4	4	4	4	1	1	4	4	1	4	1	1	1	4	1	1	1	4	2	4	4	4	4	5
Enterobacterales	101	1	1	1	1	1	1	7	1	7	1	6	7	1	1	1	1	7	1	7	1	1	1	7	7	2	1	1	1	7	1	1	1	1	7	1	1	6	1	1	1	1	1	7	7	7	7	1	7
Lactobacillales	99	1	1	1	1	1	1	1	1	1	1	1	1	1	1	1	4	1	2	1	1	1	1	1	3	3	1	1	1	1	1	1	1	1	1	1	1	1	1	1	1	1	1	1	1	1	1	1	1
Pseudomonadales	76	6	4	1	1	1	1	1	4	2	1	1	3	3	1	1	2	6	5	5	1	1	5	1	4	3	1	1	4	1	1	1	1	1	1	5	5	5	1	1	1	1	1	1	1	1	1	1	6
Cytophagales	53	1	1	1	1	1	1	5	1	1	1	1	1	1	1	1	1	1	1	4	1	1	1	1	1	1	1	5	1	1	1	3	1	1	1	1	1	1	1	4	1	1	1	1	1	1	1	4	3
Sphingomonadales	53	1	1	5	1	1	4	1	1	1	1	1	4	1	4	1	1	1	1	1	1	1	1	1	1	1	1	5	1	1	1	1	5	4	4	1	1	2	4	1	1	1	4	1	1	1	1	1	1
Propionibacteriales	51	1	1	4	1	1	1	1	5	4	1	1	1	1	1	1	1	1	1	1	6	4	1	1	1	1	4	4	1	4	4	5	5	4	1	1	1	1	1	1	4	4	1	1	1	1	1	1	1
Pseudonocardiales	48	1	1	1	1	1	1	1	1	1	1	1	1	1	1	2	1	1	2	5	1	1	1	1	1	1	1	1	1	1	1	1	1	1	1	6	1	1	1	1	1	1	1	1	2	1	1	1	1
Neisseriales	45	1	1	5	1	1	1	1	1	1	1	5	1	1	1	1	1	5	1	1	1	1	1	1	1	1	1	1	4	1	1	1	1	1	1	2	1	1	1	1	5	1	1	1	1	1
Vibrionales	42	1	4	1	1	1	1	1	1	1	1	1	1	1	1	1	1	1	1	1	1	1	1	3	1	1	1	1	1	1	1	1	1	1	1	1	1	1	1	1	1	2	1
Xanthomonadales	39	4	1	1	1	1	2	2	1	1	2	1	1	1	1	1	1	1	1	1	1	1	1	1	1	1	1	1	1	1	1	1	2	1	1	1	1	1	1	1
Actinomycetales	36	1	1	1	1	1	1	1	1	1	1	1	1	1	1	1	1	1	1	1	1	1	1	1	1	1	1	1	1	1	1	1	1	1	1	1	1
Bifidobacteriales	36	1	1	1	1	1	1	1	1	1	1	1	1	1	1	1	1	1	1	1	1	1	1	1	1	1	1	1	1	1	1	1	1	1	1	1	1
Streptosporangiales	35	6	5	1	1	1	1	1	1	1	1	2	1	1	1	1	1	5	4	1	1	1	1	1	5	1	1	1	1	1	5	1	5	1	1	5
Rhodospirillales	30	1	1	1	2	1	1	1	1	2	1	3	1	6	6	3	1	1	1	1	2	1	1	1	1	6	1	1	1	1	1
Rhodobacterales	26	1	1	1	1	1	1	1	1	1	1	1	1	1	1	1	1	1	1	1	1	1	1	1	1	1	1
Sphingobacteriales	22	1	1	1	5	1	1	1	1	5	1	1	5	1	1	5	1	5	1	5	1	1	1
Oceanospirillales	21	1	1	1	3	5	6	1	2	7	1	1	1	1	1	1	1	1	6	6	5	1
Bacteroidales	20	1	4	1	1	1	4	4	1	1	1	4	1	5	4	1	1	1	1	1	1
Micromonosporales	20	1	1	1	1	5	1	1	1	1	1	1	1	6	1	1	1	1	1	1	1
Alteromonadales	17	6	5	1	5	1	1	1	1	1	1	1	5	5	1	1	1	1
Rickettsiales	16	1	1	1	1	1	1	1	1	1	1	1	1	1	1	1	1
Deinococcales	15	1	6	6	6	1	6	6	4	1	4	1	6	4	5	5
Legionellales	15	1	1	1	1	1	1	1	1	1	1	1	1	1	1	1
Rhodocyclales	15	1	1	5	1	1	1	1	1	1	1	1	1	1	1	6
Aeromonadales	14	1	1	5	4	1	1	2	1	1	1	1	1	1	2
Chromatiales	13	1	1	1	6	6	6	1	6	6	6	6	4	1
Methylococcales	13	5	1	6	5	6	1	5	1	5	1	5	6	5
Nitrosomonadales	13	1	1	5	1	1	1	1	1	1	1	1	1	1
Caulobacterales	11	1	1	1	1	2	1	1	1	1	5	1
Chitinophagales	11	1	1	1	1	1	1	1	1	3	1	1
Acidobacteriales	10	1	1	1	1	1	1	1	1	1	1
Frankiales	10	1	5	1	5	5	5	6	5	6	1
Oscillatoriales	9	4	4	4	5	4	4	4	4	4
Geodermatophilales	8	1	1	1	1	1	1	1	1
Solirubrobacterales	8	1	1	1	1	1	1	1	1
Selenomonadales	7	1	1	5	4	1	4	4
Glycomycetales	5	1	2	1	1	1
Thermales	5	1	1	1	1	1
Thiotrichales	5	2	6	5	4	1
Chloroflexales	4	1	1	1	1
Chroococcales	4	4	4	1	4
Methanomassiliicoccales	4	1	1	1	1
Pasteurellales	4	5	5	1	1
Saprospirales	4	1	1	1	1
Spirochaetales	4	1	1	1	4
Actinopolysporales	3	1	1	1
Aquificales	3	1	1	1
Cardiobacteriales	3	1	1	5
Cellvibrionales	3	1	5	1
Chlorobiales	3	1	1	1
Dehalococcoidales	3	1	1	1
Jiangellales	3	1	1	1
Planctomycetales	3	1	1	1
Rubrobacterales	3	1	1	1
Acidaminococcales	2	2	1
Acidimicrobiales	2	1	1
Catenulisporales	2	2	2
Gemmatimonadales	2	1	1
Gloeobacterales	2	1	1
Haloferacales	2	1	1
Holophagales	2	2	1
Ignavibacteriales	2	1	1
Kiloniellales	2	1	1
Kineosporiales	2	1	6
Marinilabiliales	2	1	1
Nakamurellales	2	5	6
Natrialbales	2	1	1
Nevskiales	2	1	1
Opitutales	2	1	1
Orbales	2	1	5
Parachlamydiales	2	1	1
Salinisphaerales	2	2	2
Veillonellales	2	1	1
Verrucomicrobiales	2	6	1
Acidilobales	1	1
Acidithiobacillales	1	1
Acidothermales	1	1
Deferribacterales	1	1
Elusimicrobiales	1	1
Endomicrobiales	1	1
Ferrovales	1	1
Fusobacteriales	1	3
Herpetosiphonales	1	1
Holosporales	1	1
Ktedonobacterales	1	1
Lentisphaerales	1	1
Magnetococcales	1	2
Methanomicrobiales	1	1
Mycoplasmatales	1	1
Nitrospinales	1	1
Nitrospirales	1	5
Sulfolobales	1	1
Thermoanaerobacterales	1	1
Thermomicrobiales	1	1
[truncated: 177 more columns]

## Sheet: Family
Family	Number of prokaryotic genomes which present at least one ter gene	genome1	genome2	genome3	genome4	genome5	genome6	genome7	genome8	genome9	genome10	genome11	genome12	genome13	genome14	genome15	genome16	genome17	genome18	genome19	genome20	genome21	genome22	genome23	genome24	genome25	genome26	genome27	genome28	genome29	genome30	genome31	genome32	genome33	genome34	genome35	genome36	genome37	genome38	genome39	genome40	genome41	genome42	genome43	genome44	genome45	genome46	genome47	genome48
Streptomycetaceae	149	5	5	5	5	5	5	6	5	5	5	5	5	5	5	5	5	5	5	6	5	5	5	5	5	5	5	5	5	6	5	5	5	5	5	5	5	5	5	5	5	5	6	5	5	5	6	5	5
Flavobacteriaceae	114	1	2	5	1	1	5	1	1	1	1	1	1	5	1	1	1	2	1	5	1	1	5	1	1	1	1	1	1	1	1	1	1	1	1	4	1	1	1	1	1	5	1	1	1	4	1	1	5
Microbacteriaceae	86	2	1	1	1	1	1	1	1	1	1	1	1	1	1	1	1	1	1	5	1	1	1	1	1	1	1	1	1	1	1	1	1	1	1	1	2	1	1	1	1	2	1	1	1	1	1	1	1
Bacillaceae	84	4	6	5	6	1	1	6	6	5	6	6	6	6	1	1	5	5	1	5	1	1	5	6	5	6	4	1	6	5	6	1	5	5	5	1	5	5	6	6	4	5	5	6	4	5	1	6	5
Lactobacillaceae	82	1	1	1	1	1	1	1	1	1	1	1	1	2	1	1	1	1	1	1	1	1	1	1	1	1	1	1	1	1	1	1	1	1	1	1	1	1	1	1	1	1	1	1	1	2	1	1	1
Corynebacteriaceae	72	1	1	1	1	1	1	1	1	1	1	1	1	1	1	1	1	1	1	1	1	1	1	1	1	1	1	1	1	1	1	1	1	1	1	1	1	1	1	1	1	1	1	1	1	1	1	1	1
Micrococcaceae	55	1	1	1	1	1	1	5	1	1	1	1	1	1	1	1	4	1	1	1	1	5	1	1	1	1	1	1	1	1	1	1	1	1	1	1	1	1	1	1	1	1	1	1	1	1	1	1	1
Mycobacteriaceae	55	1	1	2	1	2	1	1	1	1	1	1	1	1	1	1	1	1	1	1	1	1	1	1	1	1	1	1	1	1	1	1	1	1	1	1	1	2	1	1	6	1	1	2	1	1	1	1	1
Pseudonocardiaceae	48	1	1	1	1	1	1	1	1	1	1	1	1	1	1	2	1	1	2	5	1	1	1	1	1	1	1	1	1	1	1	1	1	1	1	6	1	1	1	1	1	1	1	1	2	1	1	1	1
Moraxellaceae	45	4	1	1	1	1	1	4	2	1	3	3	1	5	5	1	1	5	1	4	3	1	4	1	1	5	5	5	1	1	1	4	5	1	5	1	4	1	1	4	1	1	1	5	1	1
Nocardiaceae	45	6	5	6	4	5	5	5	5	5	5	5	5	5	5	5	5	5	5	5	5	5	5	5	6	5	5	5	6	5	5	1	1	6	6	5	5	1	5	5	6	5	2	6	5	1
Sphingomonadaceae	45	1	1	5	1	1	4	1	1	1	1	1	4	1	1	1	1	1	1	1	1	1	1	5	1	1	5	4	4	1	1	2	4	1	1	1	4	1	1	1	1	1	1	4	1	1
Vibrionaceae	42	1	4	1	1	1	1	1	1	1	1	1	1	1	1	1	1	1	1	1	1	1	1	3	1	1	1	1	1	1	1	1	1	1	1	1	1	1	1	1	1	2	1
Clostridiaceae	39	1	1	4	1	4	4	1	6	4	1	4	4	4	1	1	1	1	1	1	4	4	5	1	4	4	5	1	1	5	1	1	4	1	1	4	1	1	4	3
Comamonadaceae	39	1	1	1	6	1	3	1	1	1	1	2	1	1	1	1	1	1	1	4	2	1	1	2	1	1	1	4	1	1	1	2	1	1	1	1	1	1	5	1
Paenibacillaceae	39	6	1	6	1	4	5	1	1	5	5	1	2	6	5	1	1	2	1	2	5	1	6	6	5	4	1	6	5	5	5	6	3	3	1	5	5	1	6	6
Enterobacteriaceae	37	1	1	1	7	1	1	1	7	7	2	1	1	1	1	1	7	1	1	1	1	1	7	1	1	7	1	1	1	1	7	1	1	1	7	1	1	1
Xanthomonadaceae	37	4	1	1	1	1	2	2	1	1	2	1	1	1	1	1	1	1	1	1	1	1	1	1	1	1	1	1	1	1	2	1	1	1	1	1	1	1
Actinomycetaceae	36	1	1	1	1	1	1	1	1	1	1	1	1	1	1	1	1	1	1	1	1	1	1	1	1	1	1	1	1	1	1	1	1	1	1	1	1
Bifidobacteriaceae	36	1	1	1	1	1	1	1	1	1	1	1	1	1	1	1	1	1	1	1	1	1	1	1	1	1	1	1	1	1	1	1	1	1	1	1	1
Nocardioidaceae	35	1	4	1	1	5	4	1	1	1	1	6	4	1	1	1	4	4	1	4	4	5	5	4	1	1	1	1	1	4	4	1	1	1	1	5
Pseudomonadaceae	31	6	1	1	2	6	1	1	1	1	1	1	1	1	1	1	1	1	6	1	1	1	6	1	2	1	1	1	1	6	1	1
Rhizobiaceae	29	3	1	1	1	1	1	1	2	1	1	1	1	1	1	1	1	1	1	4	1	1	1	1	1	1	3	1	1	1
Intrasporangiaceae	26	1	1	1	1	1	1	4	1	1	1	2	1	1	1	1	1	1	1	1	1	1	1	1	1	1	1
Oxalobacteraceae	25	5	5	4	5	1	4	6	5	1	4	4	4	5	5	5	5	1	5	1	1	1	1	5	3	1
Erwiniaceae	24	1	1	1	1	1	7	7	1	6	1	7	7	7	1	1	1	7	1	1	1	1	1	1	1
Neisseriaceae	24	1	1	5	1	5	1	5	1	1	1	1	1	1	1	1	1	1	1	1	1	5	1	1	1
Rhodobacteraceae	24	1	1	1	1	1	1	1	1	1	1	1	1	1	1	1	1	1	1	1	1	1	1	1	1
Lachnospiraceae	22	4	4	4	4	4	1	1	2	4	4	4	4	3	4	4	2	4	1	4	1	1	4
Sphingobacteriaceae	22	1	1	1	5	1	1	1	1	5	1	1	5	1	1	5	1	5	1	5	1	1	1
Chromobacteriaceae	21	1	1	1	1	1	1	1	1	1	1	1	1	1	4	1	1	1	2	1	1	1
Cytophagaceae	20	1	1	1	1	1	1	1	1	1	4	1	1	1	1	1	1	1	4	1	3
Gordoniaceae	20	4	5	5	1	5	1	1	1	5	5	5	5	5	5	1	1	5	4	5	1
Micromonosporaceae	20	1	1	1	1	5	1	1	1	1	1	1	1	6	1	1	1	1	1	1	1
Methylobacteriaceae	19	1	1	1	1	1	1	1	1	1	1	1	1	1	1	1	1	1	1	1
Nocardiopsaceae	18	1	1	1	1	1	1	1	2	1	1	1	1	1	1	1	1	1	1
Rhodospirillaceae	18	1	2	1	1	1	6	6	1	1	2	1	1	1	6	1	1	1	1
Cellulomonadaceae	16	1	5	1	1	1	1	5	1	1	1	1	1	1	5	1	1
Propionibacteriaceae	16	1	1	1	1	1	1	1	1	1	1	1	1	1	1	1	1
Rickettsiaceae	16	1	1	1	1	1	1	1	1	1	1	1	1	1	1	1	1
Deinococcaceae	15	1	6	6	6	1	6	6	4	1	4	1	6	4	5	5
Hymenobacteraceae	15	1	1	1	1	1	1	1	1	1	1	1	1	1	1	1
Legionellaceae	15	1	1	1	1	1	1	1	1	1	1	1	1	1	1	1
Hyphomicrobiaceae	14	1	1	1	1	1	1	1	1	1	1	1	1	1	2
Prevotellaceae	14	1	1	1	4	1	1	1	5	4	1	1	1	1	1
Burkholderiaceae	13	5	1	1	5	1	1	1	1	1	1	2	1	4
Halomonadaceae	13	1	1	1	2	1	1	1	1	1	1	6	6	1
Methylococcaceae	13	5	1	6	5	6	1	5	1	5	1	5	6	5
Phyllobacteriaceae	13	1	1	1	1	1	3	1	1	1	2	1	1	1
Yersiniaceae	13	7	1	1	1	1	7	7	1	1	1	7	1	1
Morganellaceae	12	1	7	1	1	7	1	7	1	7	7	7	7
Acetobacteraceae	11	1	1	1	2	1	3	3	1	1	1	1
Aurantimonadaceae	11	1	1	1	1	1	1	1	1	1	6	1
Caulobacteraceae	11	1	1	1	1	2	1	1	1	1	5	1
Chitinophagaceae	11	1	1	1	1	1	1	1	1	3	1	1
Acidobacteriaceae	10	1	1	1	1	1	1	1	1	1	1
Aeromonadaceae	10	1	4	1	2	1	1	1	1	1	1
Bradyrhizobiaceae	10	1	6	1	1	1	1	1	1	1	1
Peptococcaceae	10	4	4	6	5	6	4	5	6	5	1
Ruminococcaceae	10	2	4	4	4	1	5	4	2	4	4
Streptosporangiaceae	10	1	1	1	1	5	1	1	1	1	1
Zoogloeaceae	10	5	1	1	1	1	1	1	1	1	6
Alcaligenaceae	9	1	1	1	1	1	1	1	1	1
Chromatiaceae	9	1	6	6	1	6	6	6	6	1
Pectobacteriaceae	9	7	1	1	1	1	1	1	1	1
Planococcaceae	9	5	4	1	4	5	4	4	4	4
Erythrobacteraceae	8	4	1	1	1	1	1	1	1
Frankiaceae	8	5	1	5	5	5	6	5	6
Geodermatophilaceae	8	1	1	1	1	1	1	1	1
Leuconostocaceae	8	1	1	1	1	1	1	1	1
Peptostreptococcaceae	8	4	4	1	4	4	4	4	4
Brevibacteriaceae	7	1	1	1	1	1	1	1
Cyclobacteriaceae	7	1	1	1	1	1	1	1
Demequinaceae	7	1	1	1	1	1	1	1
Flammeovirgaceae	7	1	1	1	1	3	1	3
Shewanellaceae	7	1	1	1	1	1	1	1
Thermomonosporaceae	7	6	5	5	4	5	5	5
Alteromonadaceae	6	6	1	1	1	1	5
Dermabacteraceae	6	1	1	1	1	1	1
Dermacoccaceae	6	1	5	1	2	1	5
Glycomycetaceae	5	1	2	1	1	1
Microcoleaceae	5	4	4	4	4	4
Nitrosomonadaceae	5	5	1	1	1	1
Oceanospirillaceae	5	3	5	6	7	5
Thermaceae	5	1	1	1	1	1
Thiotrichaceae	5	2	6	5	4	1
Carnobacteriaceae	4	1	4	4	1
Chloroflexineae	4	1	1	1	1
Dermatophilaceae	4	1	1	1	1
Ectothiorhodospiraceae	4	1	1	6	4
Eubacteriaceae	4	4	4	1	4
Listeriaceae	4	1	1	1	1
Methanomassiliicoccaceae	4	1	1	1	1
Methylocystaceae	4	1	1	1	1
Pasteurellaceae	4	5	5	1	1
Promicromonosporaceae	4	1	1	1	1
Sporomusaceae	4	1	1	4	1
Staphylococcaceae	4	1	1	1	1
Succinivibrionaceae	4	1	5	1	2
Actinopolysporaceae	3	1	1	1
Aquificaceae	3	1	1	1
Brucellaceae	3	1	1	1
Budviciaceae	3	1	6	1
Cardiobacteriaceae	3	1	1	5
Cellvibrionaceae	3	1	5	1
Chlorobiaceae	3	1	1	1
Dehalococcoidaceae	3	1	1	1
Dietziaceae	3	1	1	1
Enterococcaceae	3	1	1	1
Jiangellaceae	3	1	1	1
Methylacidiphilaceae	3	1	1	1
Oscillatoriaceae	3	4	5	4
Patulibacteraceae	3	1	1	1
Planctomycetaceae	3	1	1	1
Psychromonadaceae	3	5	1	5
Rhodocyclaceae	3	1	1	1
Rubrobacteraceae	3	1	1	1
Selenomonadaceae	3	5	4	4
Spirochaetaceae	3	1	1	4
Thermoactinomycetaceae	3	3	1	2
Thiobacillaceae	3	1	1	1
Acidaminococcaceae	2	2	1
Acidimicrobiaceae	2	1	1
Aphanothecaceae	2	4	1
Azonexaceae	2	1	1
Bacteroidaceae	2	4	4
Beijerinckiaceae	2	4	1
Bernardetiaceae	2	5	4
Conexibacteraceae	2	1	1
Dysgonamonadaceae	2	4	1
Gemmatimonadaceae	2	1	1
Gloeobacteraceae	2	1	1
Hafniaceae	2	1	1
Hahellaceae	2	1	1
Haliscomenobacteraceae	2	1	1
Holophagaceae	2	2	1
Hyphomonadaceae	2	1	1
Jonesiaceae	2	1	1
Kiloniellaceae	2	1	1
Kineosporiaceae	2	1	6
Lewinellaceae	2	1	1
Marinilabiliaceae	2	1	1
Methylophilaceae	2	1	1
Nakamurellaceae	2	5	6
Natrialbaceae	2	1	1
Opitutaceae	2	1	1
Orbaceae	2	1	5
Oscillospiraceae	2	4	1
Rhodanobacteraceae	2	1	1
Rhodobiaceae	2	1	1
Salinisphaeraceae	2	2	2
Sanguibacteraceae	2	1	5
Segniliparaceae	2	1	1
Sinobacteraceae	2	1	1
Solirubrobacteraceae	2	1	1
Sterolibacteriaceae	2	1	1
Streptococcaceae	2	3	3
Sutterellaceae	2	1	2
Tsukamurellaceae	2	1	1
Veillonellaceae	2	1	1
Xanthobacteraceae	2	1	1
Acidothermaceae	1	1
Actinospicaceae	1	2
Alcanivoracaceae	1	1
Alicyclobacillaceae	1	1
Beutenbergiaceae	1	1
Bogoriellaceae	1	2
Borreliaceae	1	1
Caldisphaeraceae	1	1
Catenulisporaceae	1	2
Chroococcaceae	1	4
Criblamydiaceae	1	1
Crocinitomicaceae	1	1
Cryptosporangiaceae	1	1
Cyanobacteriaceae	1	4
Deferribacteraceae	1	1
Elusimicrobiaceae	1	1
Endomicrobiaceae	1	1
Ferrovaceae	1	1
Gallionellaceae	1	1
Gomontiellaceae	1	4
Haloferacaceae	1	1
Halorubraceae	1	1
Herpetosiphonaceae	1	1
Ignavibacteriaceae	1	1
Ktedonobacteraceae	1	1
Lentisphaeraceae	1	1
Leptotrichiaceae	1	3
Magnetococcaceae	1	2
Melioribacteraceae	1	1
Methanomicrobiaceae	1	1
Microscillaceae	1	4
Moritellaceae	1	5
Mycoplasmataceae	1	1
Nitrospinaceae	1	1
Nitrospiraceae	1	5
Paludibacteraceae	1	1
Parachlamydiaceae	1	1
Rikenellaceae	1	1
Ruaniaceae	1	1
Schleiferiaceae	1	1
Sporichthyaceae	1	1
Sulfolobaceae	1	1
Symbiobacteriaceae	1	1
Thermithiobacillaceae	1	1
Thermoanaerobacteraceae	1	1
Thermomicrobiaceae	1	1
Thermonemataceae	1	5
Verrucomicrobiaceae	1	6
Williamsiaceae	1	5
[truncated: 101 more columns]

## Sheet: Genus
Genus	Number of prokaryotic genomes which present at least one ter gene	genome1	genome2	genome3	genome4	genome5	genome6	genome7	genome8	genome9	genome10	genome11	genome12	genome13	genome14	genome15	genome16	genome17	genome18	genome19	genome20	genome21	genome22	genome23	genome24	genome25	genome26	genome27	genome28	genome29	genome30	genome31	genome32	genome33	genome34	genome35	genome36	genome37	genome38	genome39	genome40	genome41	genome42	genome43	genome44	genome45	genome46	genome47	genome48
Streptomyces	137	5	5	5	5	5	5	6	5	5	5	5	5	5	5	5	5	5	5	6	5	5	5	5	5	5	5	5	5	6	5	5	5	5	5	5	5	5	5	5	5	6	5	5	5	6	5	5	5
Lactobacillus	76	1	1	1	1	1	1	1	1	1	1	1	1	2	1	1	1	1	1	1	1	1	1	1	1	1	1	1	1	1	1	1	1	1	1	1	1	1	1	1	1	1	1	1	1	2	1	1	1
Corynebacterium	71	1	1	1	1	1	1	1	1	1	1	1	1	1	1	1	1	1	1	1	1	1	1	1	1	1	1	1	1	1	1	1	1	1	1	1	1	1	1	1	1	1	1	1	1	1	1	1	1
Bacillus	65	6	5	6	1	1	6	6	6	6	6	1	1	5	1	5	1	5	6	5	6	4	1	6	5	6	5	5	6	6	5	5	6	4	1	6	5	5	4	1	6	4	1	4	6	1	5	1	5
Mycobacterium	54	1	1	2	1	2	1	1	1	1	1	1	1	1	1	1	1	1	1	1	1	1	1	1	1	1	1	1	1	1	1	1	1	1	1	1	1	2	1	1	6	1	2	1	1	1	1	1	1
Clostridium	38	1	4	1	4	1	6	4	1	4	4	1	1	1	1	1	1	4	5	1	4	1	5	4	1	1	5	1	4	1	1	4	1	1	4	1	1	4	3
Microbacterium	38	1	1	1	1	1	5	1	1	1	1	1	1	1	1	1	1	1	1	1	1	1	1	1	1	1	1	1	1	1	1	1	1	1	1	1	1	1	1
Paenibacillus	33	6	6	1	4	5	1	1	5	1	2	6	5	1	1	2	5	1	6	6	5	4	1	6	5	5	5	3	3	1	5	5	1	6
Arthrobacter	32	1	1	1	5	1	1	1	1	1	1	1	5	1	1	1	1	1	1	1	1	1	1	1	1	1	1	1	1	1	1	1	1
Flavobacterium	32	5	1	5	1	1	1	1	2	1	5	1	1	5	1	1	1	1	1	1	1	1	1	1	1	1	1	1	1	1	5	5	5
Bifidobacterium	31	1	1	1	1	1	1	1	1	1	1	1	1	1	1	1	1	1	1	1	1	1	1	1	1	1	1	1	1	1	1	1
Nocardia	31	4	5	5	5	5	5	5	5	5	5	5	5	5	5	5	5	5	5	5	5	6	5	5	5	6	5	5	6	5	5	5
Pseudomonas	30	6	1	1	2	6	1	1	1	1	1	1	1	1	1	1	1	1	6	1	1	1	6	1	1	1	1	1	6	1	1
Acinetobacter	28	1	1	1	1	1	5	5	1	1	5	1	1	1	1	5	5	1	1	1	1	1	1	1	1	1	5	1	1
Chryseobacterium	25	5	1	1	5	1	5	4	5	5	1	5	5	5	5	5	5	1	1	5	5	5	5	1	5	5
Actinomyces	24	1	1	1	1	1	1	1	1	1	1	1	1	1	1	1	1	1	1	1	1	1	1	1	1
Vibrio	23	4	1	1	1	1	1	1	1	1	1	1	1	1	1	1	1	1	1	1	1	1	2	1
Nocardioides	21	4	5	4	1	1	6	4	1	4	4	1	4	4	5	5	4	1	1	4	4	5
Gordonia	20	4	5	5	1	5	1	1	1	5	5	5	5	5	5	1	1	5	4	5	1
Rhizobium	18	3	1	1	1	1	1	1	1	1	1	1	1	1	4	1	3	1	1
Rickettsia	16	1	1	1	1	1	1	1	1	1	1	1	1	1	1	1	1
Candidatus	15	1	4	1	5	1	1	1	2	1	1	1	1	1	5	1
Deinococcus	15	1	6	6	6	1	6	6	4	1	4	1	6	4	5	5
Legionella	15	1	1	1	1	1	1	1	1	1	1	1	1	1	1	1
Nocardiopsis	15	1	1	1	1	1	1	1	2	1	1	1	1	1	1	1
Novosphingobium	15	1	1	5	1	1	1	1	1	1	5	1	5	1	1	1
Methylobacterium	14	1	1	1	1	1	1	1	1	1	1	1	1	1	1
Rhodococcus	14	6	5	6	1	1	6	5	1	5	5	6	2	6	1
Cellulomonas	13	1	1	1	1	1	5	1	1	1	1	1	5	1
Photobacterium	13	1	1	1	1	1	1	1	3	1	1	1	1	1
Prevotella	13	1	1	1	4	1	1	1	5	4	1	1	1	1
Sphingomonas	13	1	1	4	4	1	1	4	1	1	2	4	1	4
Devosia	11	1	1	1	1	1	1	1	1	1	1	2
Leptospira	11	1	1	1	1	1	1	1	1	1	1	1
Neisseria	11	1	1	1	1	1	1	1	1	1	1	1
Acidovorax	10	2	1	1	4	1	1	1	1	1	1
Erwinia	10	1	1	1	7	7	1	1	1	1	1
Pedobacter	10	1	1	1	5	1	1	5	1	1	1
Stenotrophomonas	10	1	1	1	1	1	1	1	1	1	1
Aeromonas	9	1	4	1	2	1	1	1	1	1
Geobacter	9	1	1	1	1	1	1	1	1	1
Kocuria	9	1	1	1	1	1	1	1	1	1
Leifsonia	9	1	1	1	1	1	1	1	1	1
Massilia	9	5	5	4	4	5	5	5	5	5
Psychrobacter	9	4	3	3	4	5	4	5	4	4
Saccharomonospora	9	1	1	1	1	1	1	2	1	1
Sphingobium	9	1	1	1	1	1	4	1	1	1
Xanthomonas	9	2	2	1	1	1	1	1	2	1
Amycolatopsis	8	1	1	1	1	1	1	1	1
Aureimonas	8	1	1	1	1	1	1	6	1
Desulfovibrio	8	1	1	1	1	1	1	1	1
Frankia	8	5	1	5	5	5	6	5	6
Hymenobacter	8	1	1	1	1	1	1	1	1
Leucobacter	8	1	1	1	2	2	1	1	1
Pantoea	8	1	1	7	7	1	7	7	1
Paracoccus	8	1	1	1	1	1	1	1	1
Propionibacterium	8	1	1	1	1	1	1	1	1
Serratia	8	7	1	1	1	1	1	7	1
Sphingobacterium	8	1	1	1	1	1	5	5	1
Weissella	8	1	1	1	1	1	1	1	1
Actinoplanes	7	1	5	1	1	1	1	1
Brevibacterium	7	1	1	1	1	1	1	1
Escherichia	7	1	7	7	1	1	1	1
Herbaspirillum	7	1	1	1	1	1	1	1
Kitasatospora	7	5	5	5	5	5	5	5
Pseudonocardia	7	1	1	1	1	1	1	6
Shewanella	7	1	1	1	1	1	1	1
Sphingopyxis	7	1	1	1	1	1	1	1
Aeromicrobium	6	1	1	1	1	1	1
Agrobacterium	6	2	1	1	1	1	1
Bradyrhizobium	6	1	1	1	1	1	1
Demequina	6	1	1	1	1	1	1
Desulfosporosinus	6	4	6	6	5	6	5
Enterobacter	6	1	1	1	1	1	7
Halomonas	6	1	1	1	1	6	1
Helicobacter	6	5	5	1	5	5	5
Lysinibacillus	6	5	5	5	5	5	5
Moraxella	6	4	2	4	3	1	5
Pediococcus	6	1	1	1	1	1	1
Actinomadura	5	6	5	5	4	5
Agromyces	5	1	1	1	1	1
Arenimonas	5	1	1	1	1	1
Azoarcus	5	1	1	1	1	6
Brachybacterium	5	1	1	1	1	1
Brevundimonas	5	1	1	1	1	1
Eubacterium	5	4	4	1	4	4
Janthinobacterium	5	5	4	6	4	5
Knoellia	5	1	2	1	1	1
Lysobacter	5	1	1	1	1	1
Maribacter	5	1	1	1	5	1
Mesorhizobium	5	1	1	3	1	1
Micromonospora	5	1	1	1	1	1
Microvirga	5	1	1	1	1	1
Nitratireductor	5	1	1	2	1	1
Nitrosomonas	5	5	1	1	1	1
Nonlabens	5	1	1	1	1	1
Saccharothrix	5	1	1	2	5	1
Streptacidiphilus	5	5	5	5	5	5
Tetrasphaera	5	1	1	4	1	1
Actinobaculum	4	1	1	1	1
Azospirillum	4	2	1	1	1
Burkholderia	4	1	5	1	4
Chromobacterium	4	1	1	4	1
Comamonas	4	1	1	1	1
Cupriavidus	4	1	1	1	1
Curtobacterium	4	1	1	1	1
Dyadobacter	4	1	1	1	1
Erythrobacter	4	1	1	1	1
Exiguobacterium	4	1	1	1	1
Listeria	4	1	1	1	1
Meiothermus	4	1	1	1	1
Nonomuraea	4	1	1	1	1
Phycicoccus	4	1	1	1	1
Pontibacter	4	1	1	1	1
Pseudoxanthomonas	4	4	1	1	1
Ruminococcus	4	2	4	4	4
Thauera	4	1	1	1	1
Xenorhabdus	4	7	7	7	7
Achromobacter	3	1	1	1
Actinokineospora	3	1	1	1
Actinopolyspora	3	1	1	1
Arenibacter	3	1	1	1
Bdellovibrio	3	1	1	1
Blastococcus	3	1	1	1
Blautia	3	4	4	2
Bordetella	3	1	1	1
Buchnera	3	1	1	1
Campylobacter	3	5	1	1
Capnocytophaga	3	4	4	4
Caulobacter	3	1	2	1
Cellulophaga	3	1	1	4
Chlorobium	3	1	1	1
Chloroflexus	3	1	1	1
Dehalococcoides	3	1	1	1
Desulfotomaculum	3	4	5	4
Dickeya	3	1	1	1
Dietzia	3	1	1	1
Domibacillus	3	4	4	5
Ensifer	3	1	1	1
Flavihumibacter	3	1	1	1
Frigoribacterium	3	5	1	1
Glycomyces	3	2	1	1
Intrasporangium	3	1	1	1
Janibacter	3	1	1	1
Jiangella	3	1	1	1
Kingella	3	1	1	1
Klebsiella	3	1	7	7
Kluyvera	3	1	2	7
Leeuwenhoekiella	3	1	1	1
Leptolyngbya	3	3	4	3
Limnohabitans	3	1	1	1
Marinobacter	3	1	1	5
Marmoricola	3	1	1	1
Methylacidiphilum	3	1	1	1
Methylobacter	3	6	5	5
Methylomicrobium	3	1	1	6
Modestobacter	3	1	1	1
Muricauda	3	1	1	1
Myroides	3	2	1	5
Myxococcus	3	1	1	1
Nesterenkonia	3	1	1	1
Paraburkholderia	3	1	1	2
Patulibacter	3	1	1	1
Planococcus	3	4	4	4
Polaromonas	3	1	1	4
Pontibacillus	3	5	5	1
Providencia	3	1	1	7
Psychromonas	3	5	1	5
Rathayibacter	3	1	1	1
Rhodospirillum	3	6	6	1
Roseomonas	3	2	1	1
Rubrobacter	3	1	1	1
Runella	3	1	1	1
Saccharopolyspora	3	1	1	1
Serinicoccus	3	1	1	1
Spirosoma	3	1	1	1
Staphylococcus	3	1	1	1
Thiobacillus	3	1	1	1
Thiothrix	3	2	6	5
Treponema	3	1	1	4
Yersinia	3	7	1	1
Acidipropionibacterium	2	1	1
Acidobacterium	2	1	1
Aequorivita	2	1	1
Algoriphagus	2	1	1
Alicycliphilus	2	3	1
Aliivibrio	2	1	1
Alkaliphilus	2	4	4
Alloscardovia	2	1	1
Altererythrobacter	2	1	1
Aquabacterium	2	1	1
Aquitalea	2	1	1
Arcanobacterium	2	1	1
Asticcacaulis	2	1	5
Aurantimonas	2	1	1
Bacteroides	2	4	4
Beggiatoa	2	4	1
Brenneria	2	1	1
Brevibacillus	2	2	6
Cardiobacterium	2	1	5
Carnobacterium	2	4	4
Cellvibrio	2	1	1
Chitinilyticum	2	1	2
Chromohalobacter	2	1	1
Clostridioides	2	4	4
Conchiformibius	2	1	5
Conexibacter	2	1	1
Cytophaga	2	1	1
Dermacoccus	2	5	2
Desulfuromonas	2	1	1
Echinicola	2	1	1
Enterococcus	2	1	1
Enterovibrio	2	1	1
Flammeovirga	2	3	3
Flexibacter	2	5	4
Gemmatimonas	2	1	1
Geodermatophilus	2	1	1
Gloeobacter	2	1	1
Gramella	2	1	1
Granulicella	2	1	1
Grimontia	2	1	1
Hydrogenophaga	2	1	1
Hyphomonas	2	1	1
Ideonella	2	1	1
Ilumatobacter	2	1	1
Jonesia	2	1	1
Kaistia	2	1	1
Kibdelosporangium	2	1	1
Kiloniella	2	1	1
Kribbella	2	1	1
Kurthia	2	5	5
Lewinella	2	1	1
Luteipulveratus	2	1	5
Methylosarcina	2	5	6
Methylotenera	2	1	1
Microbispora	2	1	1
Mobiluncus	2	1	1
Nakamurella	2	5	6
Neptunomonas	2	5	5
Niabella	2	1	1
Nitrosoarchaeum	2	1	1
Nitrosococcus	2	6	6
Ochrobactrum	2	1	1
Oscillibacter	2	4	1
Pelobacter	2	1	1
Pelomonas	2	2	2
Phyllobacterium	2	1	1
Planomicrobium	2	4	4
Pleomorphomonas	2	1	1
Pseudogulbenkiania	2	1	1
Pseudorhodobacter	2	1	1
Rheinheimera	2	1	1
Rhizobacter	2	1	2
Rhodobacter	2	1	1
Rhodopseudomonas	2	1	1
Riemerella	2	1	1
Rothia	2	1	4
Rubellimicrobium	2	1	1
Rufibacter	2	1	1
Saccharibacillus	2	5	6
Salinisphaera	2	2	2
Salinispora	2	1	1
Salmonella	2	1	1
Sanguibacter	2	1	5
Scardovia	2	1	1
Segniliparus	2	1	1
Selenomonas	2	5	4
Shigella	2	1	1
Skermanella	2	2	1
Sodalis	2	1	1
Solirubrobacter	2	1	1
Streptococcus	2	3	3
Streptosporangium	2	1	1
Sutterella	2	1	2
Synechococcus	2	3	3
Synechocystis	2	3	4
Tatumella	2	1	1
Terriglobus	2	1	1
Thermaerobacter	2	1	1
Thermoactinomyces	2	1	2
Thermocrinis	2	1	1
Thermocrispum	2	1	1
Thioalkalivibrio	2	1	1
Thiomonas	2	1	1
Trueperella	2	1	1
Tsukamurella	2	1	1
Veillonella	2	1	1
Vitreoscilla	2	5	1
Xylella	2	1	1
Zobellia	2	1	1
Acaricomes	1	1
Acaryochloris	1	2
Acetivibrio	1	2
Acetonema	1	1
Acidiphilium	1	1
Acidisphaera	1	3
Acidocella	1	1
Acidothermus	1	1
Actinoalloteichus	1	1
Actinocatenispora	1	1
Actinomycetospora	1	1
Actinopolymorpha	1	1
Actinospica	1	2
Actinosynnema	1	1
Actinotalea	1	1
Actinotignum	1	1
Adhaeribacter	1	1
Aestuariimicrobium	1	1
Agarivorans	1	1
Agreia	1	1
Agrococcus	1	1
Alcanivorax	1	1
Alishewanella	1	1
Alistipes	1	1
Alkanindiges	1	1
alkenigignens	1	1
Allochromatium	1	6
Alloiococcus	1	1
Allokutzneria	1	1
Allosalinactinospora	1	1
Altibacter	1	1
Alysiella	1	5
Amantichitinum	1	1
Aminobacter	1	1
Ammonifex	1	1
Amorphus	1	1
Amycolicicoccus	1	1
Anabaena	1	4
Anaeroarcus	1	1
Anaerobacillus	1	4
Anaerobiospirillum	1	1
Anaeromyxobacter	1	1
Anaerostipes	1	1
Anaerotruncus	1	4
Anaerovorax	1	1
Andreprevotia	1	1
Aneurinibacillus	1	1
Angustibacter	1	1
Anoxybacillus	1	1
Aphanizomenon	1	3
Apibacter	1	1
Aquaspirillum	1	1
Aquimarina	1	4
Aquincola	1	1
Archangium	1	1
Arcticibacter	1	5
Arenitalea	1	1
Arsenicicoccus	1	1
Arsenophonus	1	1
Arthrospira	1	4
Atlantibacter	1	7
Atopococcus	1	1
Austwickia	1	1
Azohydromonas	1	1
Azonexus	1	1
Azorhizobium	1	1
Azotobacter	1	2
Azovibrio	1	1
Beijerinckia	1	4
Belnapia	1	1
Bergeyella	1	1
Beutenbergia	1	1
Bibersteinia	1	5
Bilophila	1	1
Bizionia	1	1
Borrelia	1	1
Bosea	1	1
Brachymonas	1	1
Budvicia	1	6
Buttiauxella	1	1
Butyricicoccus	1	4
Butyrivibrio	1	1
Caedibacter	1	1
Caenimonas	1	1
Caenispirillum	1	1
Caldimonas	1	1
Caldisphaera	1	1
Calditerricola	1	1
Calditerrivibrio	1	1
Calothrix	1	4
Carnimonas	1	1
Catelliglobosispora	1	1
Catenulispora	1	2
Cecembia	1	1
Cedecea	1	1
Cellulosilyticum	1	4
Cellulosimicrobium	1	1
Centipeda	1	4
Cesiribacter	1	1
Chamaesiphon	1	3
Chelatococcus	1	1
Chelonobacter	1	1
Chitinibacter	1	1
Chitinimonas	1	5
Chitiniphilus	1	1
Chitinophaga	1	3
Chondromyces	1	1
Citricoccus	1	1
Citrobacter	1	1
Clavibacter	1	1
Clostridiisalibacter	1	1
Cobetia	1	6
Cohnella	1	1
Competibacter	1	6
Contendobacter	1	6
Coprococcus	1	3
Corallococcus	1	1
Criblamydia	1	1
Crinalium	1	4
Croceibacter	1	1
Croceicoccus	1	1
Crocinitomix	1	1
Crocosphaera	1	4
Cronobacter	1	1
Cryobacterium	1	2
Cryocola	1	1
Cryptosporangium	1	1
Curvibacter	1	1
Cutibacterium	1	1
Cyanobacterium	1	4
Cylindrospermum	1	1
Cystobacter	1	1
Dactylococcopsis	1	4
Dactylosporangium	1	6
Dechloromonas	1	1
Dechlorosoma	1	1
Deefgea	1	1
Delftia	1	1
Demetria	1	1
Dermatophilus	1	1
Derxia	1	1
Desulfitobacterium	1	1
Desulfobulbus	1	1
Desulfococcus	1	1
Desulfocurvus	1	1
Desulfomicrobium	1	1
Desulforegula	1	1
Dichelobacter	1	1
Duganella	1	5
Dysgonomonas	1	4
Edaphobacter	1	1
Edwardsiella	1	1
Eikenella	1	1
Elioraea	1	1
Elizabethkingia	1	1
Elstera	1	1
Elusimicrobium	1	1
Empedobacter	1	1
Emticicia	1	1
Endomicrobium	1	1
Endozoicomonas	1	1
Epilithonimonas	1	1
Epulopiscium	1	4
Eudoraea	1	1
Ferrovum	1	1
Fibrella	1	4
Fibrisoma	1	1
Fictibacillus	1	6
Flectobacillus	1	3
Flexithrix	1	1
Frischella	1	5
Fulvimarina	1	1
Fulvivirga	1	1
Galbibacter	1	1
Gallibacterium	1	5
Gayadomonas	1	6
Geminocystis	1	4
Geofilum	1	1
Georgenia	1	2
Geothrix	1	2
Gilliamella	1	1
Glaciibacter	1	1
Granulicoccus	1	1
Gulbenkiania	1	1
Gulosibacter	1	1
Haematobacter	1	1
Haliscomenobacter	1	1
Halobacillus	1	1
Halobellus	1	1
Halobiforma	1	1
Halocynthiibacter	1	1
Haloglycomyces	1	1
Halorubrum	1	1
Halotalea	1	1
Hamadaea	1	1
Helcobacillus	1	1
Herbiconiux	1	1
Herbidospora	1	1
Herpetosiphon	1	1
Holophaga	1	1
Humibacter	1	1
Hyalangium	1	1
Hydrocarboniphaga	1	1
Hydrogenobacter	1	1
Hylemonella	1	1
Hyphomicrobium	1	1
Ignavibacterium	1	1
Indibacter	1	1
Inquilinus	1	1
Isoptericola	1	1
Johnsonella	1	4
Joostella	1	1
Kamptonema	1	4
Kineococcus	1	6
Kineosphaera	1	1
Komagataeibacter	1	1
Kordia	1	1
Ktedonobacter	1	1
Kushneria	1	1
Kutzneria	1	1
Kytococcus	1	1
Labrenzia	1	1
Lachnobacterium	1	4
Lampropedia	1	1
Laribacter	1	1
Lawsonia	1	1
Leadbetterella	1	1
Lechevalieria	1	1
Leclercia	1	1
Leeia	1	1
Leminorella	1	1
Lentisphaera	1	1
Lentzea	1	1
Leptonema	1	1
Leptothrix	1	1
Limnobacter	1	1
Limnoraphis	1	5
Longispora	1	1
Lonsdalea	1	7
Luteibacter	1	1
Lyngbya	1	4
Lysinimicrobium	1	1
Magnetococcus	1	2
Magnetospirillum	1	1
Marinagarivorans	1	5
Marinobacterium	1	3
Marinomonas	1	7
Marivirga	1	1
Mastigocladus	1	1
Melioribacter	1	1
Mesoflavibacter	1	1
Metallosphaera	1	1
Methanoculleus	1	1
Methanomassiliicoccus	1	1
methylaliphatogenes	1	1
Methylocaldum	1	5
Methyloceanibacter	1	1
Methylogaea	1	1
Methylomonas	1	1
Methylopila	1	1
Methyloversatilis	1	1
Methylovulum	1	5
Micrococcus	1	1
Microcoleus	1	4
Microlunatus	1	1
Microscilla	1	4
Microtetraspora	1	5
Microvirgula	1	1
Mizugakiibacter	1	1
Mobilicoccus	1	1
Moellerella	1	1
Morganella	1	7
Moritella	1	5
Mucilaginibacter	1	5
Muribacter	1	1
Mycetocola	1	1
Mycoplasma	1	1
Myxosarcina	1	4
Nafulsella	1	1
Natrialba	1	1
Neosynechococcus	1	1
Niastella	1	1
Nitritalea	1	1
Nitrococcus	1	6
Nitrospina	1	1
Niveispirillum	1	1
Nostoc	1	4
Noviherbaspirillum	1	1
Novispirillum	1	1
Obesumbacterium	1	1
Oceanospirillum	1	6
Oerskovia	1	1
Olivibacter	1	1
Opitutaceae	1	1
Opitutus	1	1
Ornithinibacillus	1	1
Ornithinimicrobium	1	1
Ornithobacterium	1	1
Oscillatoria	1	4
Oscillochloris	1	1
Paeniglutamicibacter	1	1
Paenirhodobacter	1	1
Paenisporosarcina	1	1
Paludibacter	1	1
Paludibacterium	1	1
Pannonibacter	1	1
Parachlamydia	1	1
Paraoerskovia	1	5
Parascardovia	1	1
Parvibaculum	1	1
Paucibacter	1	1
Pectobacterium	1	1
Pedosphaera	1	1
Pelagibacterium	1	1
Pelosinus	1	4
Peptoanaerobacter	1	4
Peptoclostridium	1	4
Perlucidibaca	1	1
Phaeodactylibacter	1	1
Phaeospirillum	1	6
Phascolarctobacterium	1	1
Phaseolibacter	1	6
Phenylobacterium	1	1
Photorhabdus	1	1
Pimelobacter	1	1
Planctomyces	1	1
Planktothrix	1	4
Plantibacter	1	5
Plautia	1	1
Plesiocystis	1	1
Plesiomonas	1	1
Pleurocapsa	1	4
Pluralibacter	1	1
Polycyclovorans	1	1
Porphyrobacter	1	4
Pragia	1	1
Prauserella	1	1
Promicromonospora	1	1
Propionicicella	1	1
Propionimicrobium	1	1
Proteiniphilum	1	1
Proteus	1	7
Protochlamydia	1	1
Pseudacidovorax	1	1
Pseudanabaena	1	1
Pseudarthrobacter	1	1
Pseudobacteroides	1	5
Pseudochrobactrum	1	1
Pseudoclavibacter	1	1
Pseudoduganella	1	4
Pseudoglutamicibacter	1	1
Psychroflexus	1	1
Pusillimonas	1	1
Rahnella	1	1
Ramlibacter	1	1
Raphidiopsis	1	4
Renibacterium	1	1
Rhodoferax	1	1
Rhodomicrobium	1	1
Rhodonellum	1	1
Rhodopirellula	1	1
Rhodovulum	1	1
Robiginitalea	1	1
Roseateles	1	1
Roseburia	1	4
Roseivivax	1	1
Roseovarius	1	1
Rouxiella	1	7
Ruania	1	1
Rubidibacter	1	1
Rubritepida	1	1
Rubrivivax	1	1
Rudanella	1	1
Saccharibacter	1	3
Salinarimonas	1	6
Salinibacterium	1	1
Salinicoccus	1	1
Salisaeta	1	1
Sandaracinus	1	1
Sarcina	1	4
Saxeibacter	1	5
Schleiferia	1	1
Schlesneria	1	1
Sciscionella	1	2
Sebaldella	1	3
Sediminibacterium	1	1
Segetibacter	1	1
selenatireducens	1	1
Shimazuella	1	3
Shimwellia	1	1
Siccibacter	1	1
Silanimonas	1	1
Silvibacterium	1	1
Simonsiella	1	5
Simplicispira	1	6
Sinomonas	1	4
Snodgrassella	1	1
Solibacter	1	1
Solitalea	1	1
Sphaerotilus	1	1
Spirillospora	1	5
Spirulina	1	4
Sporichthya	1	1
Sporocytophaga	1	4
Stackebrandtia	1	1
Stanieria	1	4
Stenoxybacter	1	1
Stigmatella	1	1
Streptomonospora	1	1
Succinatimonas	1	2
Succinimonas	1	5
Succinispira	1	2
Succinivibrio	1	1
Sulfitobacter	1	1
Sulfuricella	1	1
Sulfuricurvum	1	1
Sulfuritalea	1	1
Symbiobacterium	1	1
Syntrophus	1	1
Tepidimonas	1	1
Terasakiella	1	1
Terrabacter	1	1
Terracidiphilus	1	1
Terrimonas	1	1
Terrisporobacter	1	4
Tessaracoccus	1	1
Tetragenococcus	1	1
Thalassobaculum	1	1
Thermithiobacillus	1	1
Thermobifida	1	1
Thermomicrobium	1	1
Thermomonas	1	2
Thermomonospora	1	5
Thermonema	1	5
Thermophagus	1	1
Thermosinus	1	1
Thermus	1	1
Thiocapsa	1	1
Thiocystis	1	6
Thioflavicoccus	1	6
Thiorhodococcus	1	6
Thiorhodospira	1	4
Tistrella	1	1
Tolumonas	1	1
Tolypothrix	1	4
Tomitella	1	6
Trabulsiella	1	1
Trichodesmium	1	4
Tropheryma	1	1
Tumebacillus	1	1
Turicella	1	1
Turneriella	1	1
Uliginosibacterium	1	5
Varibaculum	1	1
Verminephrobacter	1	2
Verrucomicrobium	1	6
Verrucosispora	1	1
Virgibacillus	1	2
Viridibacillus	1	4
Vogesella	1	1
Vulgatibacter	1	1
Weeksella	1	1
Williamsia	1	5
Xanthobacter	1	1
Xenococcus	1	4
Xylanibacter	1	1
Xylanimonas	1	1
Yaniella	1	1
Yokenella	1	1
Zhouia	1	1
Zimmermannella	1	1
Zooshikella	1	1
Zymobacter	1	2
Zymomonas	1	4
[truncated: 89 more columns]
